# Supplementary material for: Coping, mood and health-related quality of life: a cross-sectional study in Chinese patients with advanced lung cancer
Source: PubMed Central journal article supplement — BMJ Open. 2019 May 5;9(5):e023672. doi: 10.1136/bmjopen-2018-023672 (PMC6501988; doi:10.1136/bmjopen-2018-023672), 2019-05-05

Table 1 Mood and Health-related Quality of Life by Socio-demographic and Clinical Characteristics

| <b>Variables</b>                                 | <b>M(SD) / n (%)</b> | <b>Positive mood</b> | <b>Negative mood</b> | <b>Mobility</b> | <b>Self-care</b> | <b>Usual activities</b> | <b>Pain/discomfort</b> | <b>Anxiety/depression</b> | <b>EQ-5D utility index</b> |
|--------------------------------------------------|----------------------|----------------------|----------------------|-----------------|------------------|-------------------------|------------------------|---------------------------|----------------------------|
| <b>Age (years)</b>                               | 59.99 (9.53)         |                      |                      |                 |                  |                         |                        |                           |                            |
| <b>Gender</b>                                    |                      |                      |                      |                 |                  |                         |                        |                           |                            |
| Male                                             | 183 (70.1%)          | 2.41 (0.75)          | 1.80 (0.73)          | 4.39 (0.95)     | 4.63 (0.79)      | 4.33 (0.92)             | 4.03 (0.87)            | 4.24 (0.75)               | 0.81 (0.17)                |
| Female                                           | 78 (29.9%)           | 2.34 (0.78)          | 1.93 (0.83)          | 4.21 (1.04)     | 4.50 (0.96)      | 4.06 (1.05)             | 3.91 (0.87)            | 4.21 (0.65)               | 0.78 (0.21)                |
| <b>Education</b>                                 |                      |                      |                      |                 |                  |                         |                        |                           |                            |
| Elementary school or lower                       | 55 (21.1%)           | 2.28 (0.79)          | 1.82 (0.73)          | 4.54 (0.92)     | 4.64 (0.80)      | 4.31 (0.96)             | 3.98 (0.91)            | 4.11 (0.74)               | 0.80 (0.18)                |
| Middle school                                    | 91 (34.9%)           | 2.35 (0.69)          | 1.94 (0.79)          | 4.24 (0.96)     | 4.57 (0.86)      | 4.14 (1.04)             | 3.90 (0.87)            | 4.16 (0.79)               | 0.78 (0.19)                |
| High school                                      | 66 (25.3%)           | 2.46 (0.77)          | 1.71 (0.63)          | 4.32 (1.08)     | 4.59 (0.89)      | 4.29 (0.96)             | 4.05 (0.79)            | 4.32 (0.66)               | 0.82 (0.17)                |
| College or higher                                | 49 (18.8%)           | 2.51 (0.84)          | 1.83 (0.88)          | 4.41 (0.96)     | 4.59 (0.84)      | 4.35 (0.86)             | 4.10 (0.94)            | 4.35 (0.63)               | 0.83 (0.20)                |
| <b>Marital status</b>                            |                      |                      |                      |                 |                  |                         |                        |                           |                            |
| Married                                          | 247 (94.6%)          | 2.40 (0.77)          | 1.83 (0.76)          | 4.34 (0.98)     | 4.60 (0.85)      | 4.25 (0.98)             | 3.98 (0.89)            | 4.23 (0.71)               | 0.80 (0.19)                |
| Single/divorced/widowed                          | 14 (5.4%)            | 2.23 (0.58)          | 1.86 (0.82)          | 4.21 (1.05)     | 4.57 (0.85)      | 4.29 (0.83)             | 4.21 (0.58)            | 4.07 (1.00)               | 0.78 (0.18)                |
| <b>Perceived cancer-related financial burden</b> |                      |                      |                      |                 |                  |                         |                        |                           |                            |
| None                                             | 37 (14.2%)           | 2.72 (0.89)          | 1.47 (0.50)          | 4.86 (0.42)     | 4.92 (0.28)      | 4.81 (0.46)             | 4.51 (0.56)            | 4.59 (0.50)               | 0.92 (0.08)                |
| Slight                                           | 100 (38.3%)          | 2.27 (0.74)          | 1.74 (0.63)          | 4.21 (1.09)     | 4.54 (0.88)      | 4.23 (0.91)             | 3.91 (0.79)            | 4.22 (0.56)               | 0.78 (0.19)                |
| Moderate                                         | 63 (24.1%)           | 2.53 (0.80)          | 1.87 (0.74)          | 4.43 (0.86)     | 4.65 (0.79)      | 4.17 (0.98)             | 3.90 (0.93)            | 4.27 (0.70)               | 0.80 (0.18)                |
| Severe                                           | 36 (13.8%)           | 2.16 (0.51)          | 1.94 (0.84)          | 4.25 (0.77)     | 4.64 (0.68)      | 4.22 (0.90)             | 4.06 (1.01)            | 4.19 (0.71)               | 0.82 (0.14)                |
| Very Severe                                      | 25 (9.6%)            | 2.38 (0.62)          | 2.52 (1.02)          | 3.96 (1.34)     | 4.12 (1.33)      | 3.76 (1.42)             | 3.68 (0.95)            | 3.64 (1.19)               | 0.68 (0.26)                |
| <b>Time since diagnosis<sup>a</sup></b>          |                      |                      |                      |                 |                  |                         |                        |                           |                            |
| Less than 6 months                               | 144 (55.2%)          | 2.38 (0.77)          | 1.84 (0.77)          | 4.40 (0.96)     | 4.60 (0.84)      | 4.24 (1.02)             | 3.95 (0.90)            | 4.19 (0.76)               | 0.80 (0.19)                |
| 6-12months                                       | 32 (12.3%)           | 2.54 (0.68)          | 1.91 (0.72)          | 4.19 (1.28)     | 4.50 (1.05)      | 4.19 (1.12)             | 4.19 (0.78)            | 4.19 (0.82)               | 0.79 (0.23)                |
| 12-24 months                                     | 31 (11.9%)           | 2.54 (0.87)          | 1.71 (0.75)          | 4.35 (0.80)     | 4.71 (0.53)      | 4.42 (0.62)             | 3.97 (0.71)            | 4.32 (0.65)               | 0.83 (0.11)                |

|                                     |             |             |             |             |             |             |             |             |             |
|-------------------------------------|-------------|-------------|-------------|-------------|-------------|-------------|-------------|-------------|-------------|
| More than 24 months                 | 46 (17.6%)  | 2.25 (0.72) | 1.86 (0.75) | 4.17 (1.00) | 4.48 (0.96) | 4.17 (0.93) | 3.91 (0.96) | 4.26 (0.61) | 0.78 (0.20) |
| <b>Stage</b>                        |             |             |             |             |             |             |             |             |             |
| III                                 | 82 (31.4%)  | 2.50 (0.71) | 1.96 (0.90) | 4.35 (0.93) | 4.55 (0.86) | 4.20 (1.09) | 3.95 (0.94) | 4.13 (0.78) | 0.79 (0.19) |
| IV                                  | 179 (68.6%) | 2.34 (0.78) | 1.78 (0.68) | 4.33 (1.00) | 4.61 (0.84) | 4.28 (0.91) | 4.01 (0.84) | 4.27 (0.69) | 0.81 (0.18) |
| <b>Lung cancer type<sup>b</sup></b> |             |             |             |             |             |             |             |             |             |
| NSC-Adenocarcinoma                  | 140 (53.6%) | 2.39 (0.78) | 1.88 (0.79) | 4.28 (0.99) | 4.56 (0.85) | 4.20 (0.94) | 3.91 (0.92) | 4.18 (0.70) | 0.79 (0.19) |
| NSC-Squamous                        | 47 (18.0%)  | 2.50 (0.81) | 1.84 (0.80) | 4.45 (0.85) | 4.68 (0.63) | 4.32 (0.86) | 4.00 (0.81) | 4.26 (0.57) | 0.81 (0.14) |
| NSC-Poorly differentiated           | 24 (9.2%)   | 2.46 (0.61) | 1.77 (0.67) | 4.08 (1.25) | 4.38 (1.21) | 3.88 (1.39) | 3.75 (0.94) | 4.13 (0.99) | 0.72 (0.24) |
| NSC-others                          | 7 (2.7%)    | 2.30 (0.60) | 1.64 (0.40) | 4.71 (0.49) | 5.00 (0.00) | 4.71 (0.49) | 4.71 (0.49) | 4.57 (0.53) | 0.92 (0.10) |
| Small cell                          | 43 (16.5%)  | 2.26 (0.76) | 1.76 (0.71) | 4.49 (0.96) | 4.67 (0.87) | 4.49 (0.88) | 4.26 (0.73) | 4.35 (0.78) | 0.85 (0.17) |
| <b>Treatment</b>                    |             |             |             |             |             |             |             |             |             |
| Received surgery                    |             |             |             |             |             |             |             |             |             |
| Yes                                 | 61 (23.4%)  | 2.49 (0.78) | 1.95 (0.85) | 4.20 (0.98) | 4.51 (0.83) | 4.20 (0.96) | 3.97 (0.86) | 4.30 (0.74) | 0.80 (0.18) |
| No                                  | 200 (76.6%) | 2.36 (0.75) | 1.80 (0.73) | 4.38 (0.98) | 4.62 (0.85) | 4.27 (0.97) | 4.00 (0.88) | 4.21 (0.72) | 0.80 (0.19) |
| Received chemotherapy               |             |             |             |             |             |             |             |             |             |
| Yes                                 | 252 (96.6%) | 2.40 (0.76) | 1.83 (0.76) | 4.33 (0.99) | 4.59 (0.86) | 4.25 (0.98) | 4.00 (0.87) | 4.22 (0.73) | 0.80 (0.19) |
| No                                  | 9 (3.4%)    | 2.16 (0.68) | 1.83 (0.72) | 4.44 (0.73) | 4.67 (0.50) | 4.33 (0.71) | 3.67 (1.00) | 4.33 (0.50) | 0.81 (0.16) |
| Received radiotherapy               |             |             |             |             |             |             |             |             |             |
| Yes                                 | 61 (23.4%)  | 2.36 (0.70) | 2.04 (0.87) | 4.05 (1.19) | 4.33 (1.21) | 4.02 (1.09) | 3.74 (1.05) | 4.13 (0.62) | 0.74 (0.23) |
| No                                  | 200 (76.6%) | 2.40 (0.78) | 1.77 (0.71) | 4.43 (0.89) | 4.68 (0.69) | 4.33 (0.92) | 4.07 (0.80) | 4.26 (0.75) | 0.82 (0.16) |
| Received targeted therapy           |             |             |             |             |             |             |             |             |             |
| Yes                                 | 38 (14.6%)  | 2.24 (0.79) | 1.83 (0.56) | 4.21 (1.14) | 4.47 (1.08) | 4.11 (1.09) | 3.79 (1.04) | 4.26 (0.64) | 0.77 (0.25) |
| No                                  | 223 (85.4%) | 2.42 (0.75) | 1.83 (0.79) | 4.36 (0.95) | 4.61 (0.80) | 4.28 (0.95) | 4.03 (0.84) | 4.22 (0.74) | 0.81 (0.17) |

Scale range: Confrontation, resigned acceptance: 1 (never) – 4 (very often); Positive mood, negative mood: 1 (very slightly) – 5 (extremely); Mobility, self-care, usual activities, pain/discomfort, anxiety/depression: 1 (very severe) – 5 (no); EQ-5D utility index: -1 (worse than death) – 1 (full health)

Figure 1 Flow Chart of the Sample Selection Procedure

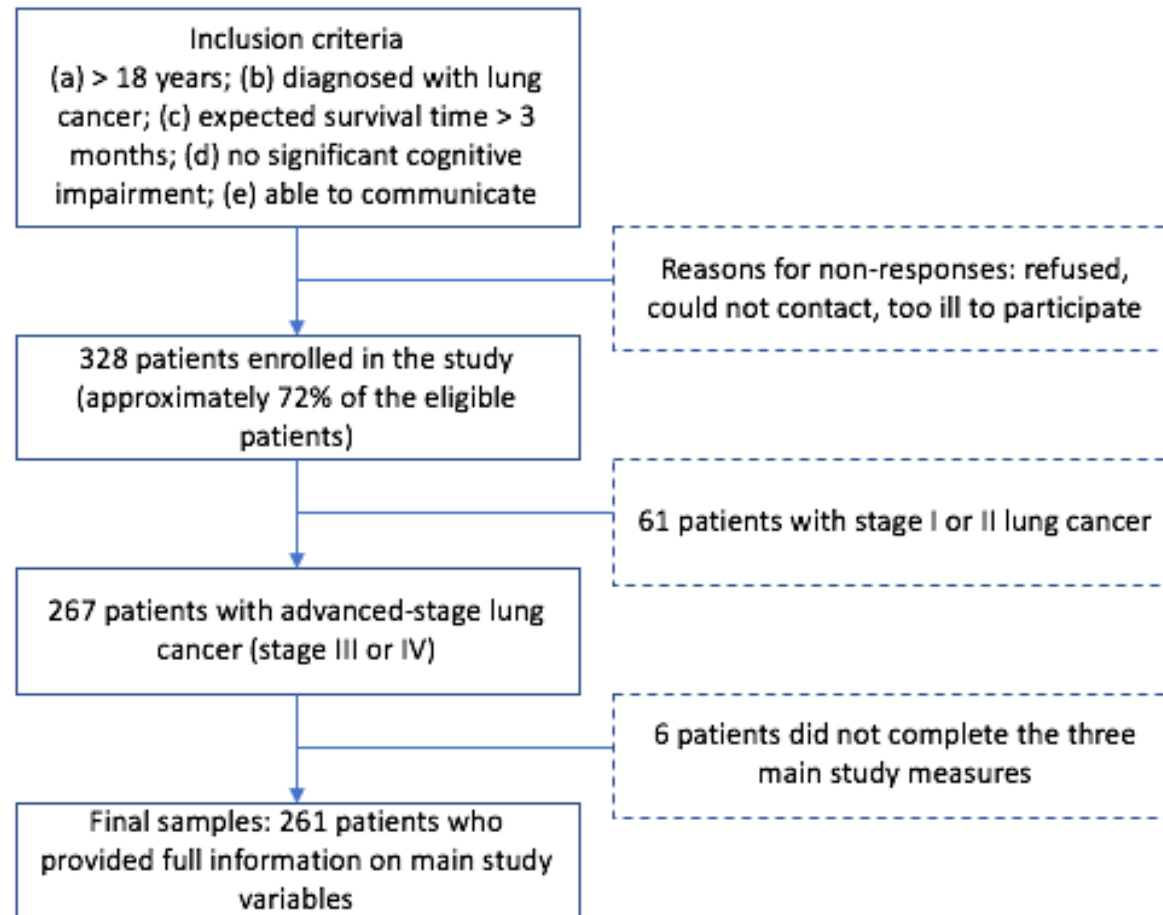

Supplement: bmjopen-2018-023672supp001.pdf [file bmjopen-2018-023672supp001.pdf]
