# Supplementary material for: Coping, mood and health-related quality of life: a cross-sectional study in Chinese patients with advanced lung cancer
Source: PubMed Central journal article supplement — BMJ Open. 2019 May 5;9(5):e023672. doi: 10.1136/bmjopen-2018-023672 (PMC6501988; doi:10.1136/bmjopen-2018-023672), 2019-05-05
Supplement: bmjopen-2018-023672.draft_revisions.pdf [file bmjopen-2018-023672.draft_revisions.pdf]

# BMJ Open

BMJ Open is committed to open peer review. As part of this commitment we make the peer review history of every article we publish publicly available.

When an article is published we post the peer reviewers' comments and the authors' responses online. We also post the versions of the paper that were used during peer review. These are the versions that the peer review comments apply to.

The versions of the paper that follow are the versions that were submitted during the peer review process. They are not the versions of record or the final published versions. They should not be cited or distributed as the published version of this manuscript.

BMJ Open is an open access journal and the full, final, typeset and author-corrected version of record of the manuscript is available on our site with no access controls, subscription charges or pay-per-view fees (<http://bmjopen.bmj.com>).

If you have any questions on BMJ Open's open peer review process please email [editorial.bmjopen@bmj.com](mailto:editorial.bmjopen@bmj.com)

# BMJ Open

## Coping and health-related quality of life in patients with advanced lung cancer: The mediating role of positive and negative mood

|                               |                                                                                                                                                                                                                                                                                                                                                                                                                                                                                                                                                                                                                                                                                                                                                                                                                                                                                                                                                                                                                                                                                                                                                                                                            |
|-------------------------------|------------------------------------------------------------------------------------------------------------------------------------------------------------------------------------------------------------------------------------------------------------------------------------------------------------------------------------------------------------------------------------------------------------------------------------------------------------------------------------------------------------------------------------------------------------------------------------------------------------------------------------------------------------------------------------------------------------------------------------------------------------------------------------------------------------------------------------------------------------------------------------------------------------------------------------------------------------------------------------------------------------------------------------------------------------------------------------------------------------------------------------------------------------------------------------------------------------|
| Journal:                      | <i>BMJ Open</i>                                                                                                                                                                                                                                                                                                                                                                                                                                                                                                                                                                                                                                                                                                                                                                                                                                                                                                                                                                                                                                                                                                                                                                                            |
| Manuscript ID                 | bmjopen-2018-023672                                                                                                                                                                                                                                                                                                                                                                                                                                                                                                                                                                                                                                                                                                                                                                                                                                                                                                                                                                                                                                                                                                                                                                                        |
| Article Type:                 | Research                                                                                                                                                                                                                                                                                                                                                                                                                                                                                                                                                                                                                                                                                                                                                                                                                                                                                                                                                                                                                                                                                                                                                                                                   |
| Date Submitted by the Author: | 25-Apr-2018                                                                                                                                                                                                                                                                                                                                                                                                                                                                                                                                                                                                                                                                                                                                                                                                                                                                                                                                                                                                                                                                                                                                                                                                |
| Complete List of Authors:     | <p>He, Yaping; Shanghai Jiao Tong University, School of Public Health; Shanghai Jiao Tong University, Center for Health Technology Assessment, Shanghai Jiao Tong University China Hospital Development Institute</p> <p>Jian, Hong; Shanghai Chest Hospital, Shanghai Jiao Tong University, Department of Oncology</p> <p>Yan, Meiqiong; Shanghai Chest Hospital, Shanghai Jiao Tong University, Department of Oncology</p> <p>Zhu, Jingfen; Shanghai Jiao Tong University, School of Public Health; Shanghai Jiao Tong University, Center for Health Technology Assessment, Shanghai Jiao Tong University China Hospital Development Institute</p> <p>Li, Guohong; Shanghai Jiao Tong University, School of Public Health; Shanghai Jiao Tong University, Center for Health Technology Assessment, Shanghai Jiao Tong University China Hospital Development Institute</p> <p>Lou, Vivian W. Q.; The University of Hong Kong, Department of Social Work &amp; Social Administration; The University of Hong Kong, Sau Po Centre on Ageing</p> <p>Chen, Jieling; The University of Hong Kong, Department of Social Work and Social Administration; The University of Hong Kong, Sau Po Centre on Aging</p> |
| Keywords:                     | coping, quality of life, lung cancer, mood                                                                                                                                                                                                                                                                                                                                                                                                                                                                                                                                                                                                                                                                                                                                                                                                                                                                                                                                                                                                                                                                                                                                                                 |

SCHOLARONE™  
Manuscripts

## COPING, MOOD AND HRQOL IN LUNG CANCER PATIENTS

Coping and health-related quality of life in patients with advanced lung cancer: The  
mediating role of positive and negative mood

He, Yaping<sup>1,2</sup>

Jian, Hong<sup>3</sup>

Yan, Meiqiong<sup>3</sup>

Zhu, Jingfen<sup>1,2</sup>

Li, Guohong<sup>1,2</sup>

Lou, Weiqun, Vivian<sup>4,5</sup>

Chen, Elaine, Jieling<sup>4,5</sup>

Affiliation:

1. School of Public Health, Shanghai Jiao Tong University
2. Center for Health Technology Assessment, Shanghai Jiao Tong University China  
Hospital Development Institute
3. Department of Oncology, Shanghai Chest Hospital, Shanghai Jiao Tong University
4. Department of Social Work & Social Administration, The University of Hong Kong
5. Sau Po Centre on Ageing, The University of Hong Kong

Corresponding author: Chen Jieling, Elaine, Department of Social Work & Social  
Administration, The University of Hong Kong, Pokfulam Road, Hong Kong,  
elaine09@connect.hku.hk; Lou, Weiqun, Vivian, PhD, Department of Social Work & Social  
Administration, Sau Po Centre on Ageing, The University of Hong Kong, Pokfulam Road,  
Hong Kong, (+852)39174835, wlou@hku.hk.

## COPING, MOOD AND HRQOL IN LUNG CANCER PATIENTS

## Abstract

**Objectives:** The ways patients coping with the life-threatening illness can influence their health-related quality of life (HRQoL). This study aims to examine the mediating role of positive and negative mood in the relationship between coping and HRQoL in patients with advanced lung cancer.

**Methods:** A sample of 261 patients (mean age: 59.99±9.53) with diagnosis of stage III or IV lung cancer was recruited from the inpatient unit in a hospital that specializes in chest-related disease in Shanghai, China. Participants completed measurements including Medical Coping Modes Questionnaire, Positive and Negative Affect Schedule, and 5-level EuroQol 5-dimension instrument.

**Results:** Despite the total effects of confrontation on HRQoL were not significant, competing indirect effects via mood were identified: (1) Positive indirect effects were found for confrontation on mobility, usual activities, pain/discomfort, and overall utility index through positive mood; (2) Negative indirect effects were found for confrontation on mobility, pain/discomfort, anxiety/depression, and overall utility index through negative mood. Resigned acceptance was negatively associated with HRQoL, and consistent indirect effects via mood were identified: (1) Negative indirect effects were found for resigned acceptance on mobility, self-care, usual activities, pain/discomfort, and overall utility index through positive mood; (2) Negative indirect effect were found for resigned acceptance on domains of HRQOL and overall utility index through negative mood.

**Conclusions:** Confronting advanced lung cancer can fuel ambivalent emotional experiences, which contribute to health outcomes. Nevertheless, accepting the illness in a resigned way can be maladaptive for health outcomes. Interventions are suggested to consider the role of

## COPING, MOOD AND HRQOL IN LUNG CANCER PATIENTS

positive and negative mood, and their relationships with coping to help to improve or maintain quality of life in patients with advanced lung cancer.

**Keywords:** coping; quality of life; mood; lung cancer

## Strengths and limitations of this study

- The study addressed health-related quality of life (HRQoL), an important health outcome of treatment for advanced lung cancer, and examined the psychological factors associated with HRQoL.
- The study examined the mediating role of positive and negative mood in relationship between coping and a range of health outcomes (mobility, self-care, usual activities, pain/discomfort, anxiety/depression, overall HRQoL), which identifies the potential pathways between coping and HRQoL in patients with advanced lung cancer.
- Convenience sampling could compromise the generalizability of the findings.
- Cross-sectional design.

## 1. Introduction

During the past decade, lung cancer has become a major cause of cancer incidence and mortality in China and many other countries [1, 2]. Lung cancer survival rates are poor, with a five-year survival rate in China of 16.1% [3]. As curative treatments are limited for advanced lung cancer, improving or maintaining quality of life is the main focus of treatment. Prognostic value of health-related quality of life (HRQoL) in patients with lung cancer is supported by a number of studies [4, 5]. In addition, positive mood is associated with increased longevity [6, 7], independent of negative affect, prior medical conditions, functional status and self-rated health [6].

The diagnosis of lung cancer can result in enormous stress for patients and their families, such as symptom burden [8], decisions about treatment options [9], and financial concerns [10]. The quality of life is significantly affected in patients with an advanced lung cancer [11]. Previous research has investigated correlates of HRQoL in cancer patients, such as sociodemographic characteristics (e.g., older age, being female), clinical factors (e.g., stage, metastasis, time since diagnosis, treatment options), and psychosocial factors (e.g., coping, social support) [12]. Specifically, the manner in which patients cope with the life-threatening illness is indicated to contribute to mood and HRQoL in patients with advanced cancer [13, 14]. Two coping strategies, confrontation and resigned acceptance, are regarded as important in cancer patients [15]. Confrontation is a form of active coping that involves seeking information from various sources, asking for advice, and cognitive redefinition [15]. Some studies indicated that confrontation was adaptive for cancer patients, which was associated with less negative mood [16-18], and better quality of life [19, 20]. However, other studies found insignificant associations between confrontation and health outcomes among cancer patients [21-23]. For instance, Nipp et al. [23] studied 350 patients with incurable lung or gastrointestinal cancer, and found that using active coping was not

## COPING, MOOD AND HRQOL IN LUNG CANCER PATIENTS

1  
2  
3 associated with psychological distress or quality of life. It is suggested that confrontation  
4  
5 could direct one's attention to the disease and its side effects, making it less effective in  
6  
7 coping with cancer [15, 19]. On the other hand, resigned acceptance is a form of passive  
8  
9 coping, in which individuals accept the stressful situation without endeavors to alter it [24,  
10  
11 25]. Research shows that resigned acceptance could be maladaptive, which was associated  
12  
13 with less favorable outcomes, such as negative mood and low quality of life, in cancer  
14  
15 patients and survivors [21, 26, 27].  
16  
17

18  
19 Although research shows that coping is associated with HRQoL in cancer patients, the  
20  
21 mechanism of the link between coping and HRQoL remains largely unexamined in cancer  
22  
23 patients. Preliminary exploration suggests that behavioral, cognitive, mood factors may be  
24  
25 potential pathways between coping and health outcomes [28-32]. Studies among cancer  
26  
27 patients and survivors indicate that negative mood is associated with poor HRQOL, whereas  
28  
29 positive mood is associated with better HRQoL [27, 33, 34]. Negative and positive mood  
30  
31 involves different physiological responses (e.g., nervous, endocrine, and immune system  
32  
33 functioning), which can influence overall physical health [35, 36]. Additionally, the broaden-  
34  
35 and-build theory of positive mood indicates that positive mood can broaden one's attention  
36  
37 scope and thought-action repertoires, which could be beneficial for physical health; In  
38  
39 contrast, negative mood can fueled a narrowed, socially isolating thought-action tendencies,  
40  
41 which could result in poor health outcomes [37, 38]. Several studies examined the mediating  
42  
43 role of mood in linking coping and health outcomes [30-32]. For instance, in a prospective  
44  
45 study among HIV caregivers, higher social coping predicted an increase in positive affect,  
46  
47 which decreased levels of physical symptoms, whereas higher cognitive avoidance predicted  
48  
49 enhanced negative affect, which resulted in higher levels of physical symptoms [30]. In  
50  
51 another study involving a sample of hypertensive patients, depressive symptoms were found  
52  
53 to mediate the relationship between emotional coping and quality of life [32]. However, in  
54  
55  
56  
57

## COPING, MOOD AND HRQOL IN LUNG CANCER PATIENTS

1  
2  
3 the context of advanced cancer, to our knowledge, no study has examined the possible  
4  
5 pathways between coping and HRQoL. Since patients with advanced cancer can encounter  
6  
7 numerous stress, understanding the effect of coping on health and identifying the pathways  
8  
9 through which patients maintain health and quality of life can provide important insights for  
10  
11 clinical practice and interventions.  
12  
13

14  
15 Taken together, the current study addresses the relationships between coping, mood,  
16  
17 and HRQoL among patients with advanced lung cancer. We examined the effect of  
18  
19 confrontation and resigned acceptance coping on positive mood, negative mood, and HRQoL,  
20  
21 and tested mediating role of positive and negative mood in the relationship between coping  
22  
23 and HRQoL.  
24  
25

## 26 **2. Method**

### 27 **2.1 Participants and Public Involvement**

28  
29  
30  
31 Participants were recruited from the inpatient unit of the department of chest-  
32  
33 oncology medicine at a public hospital that specializes in chest-related disease in Shanghai,  
34  
35 China. The hospital is well recognized for its expertise, resources, and treatments for chest-  
36  
37 related disease. A large number of patients with lung cancer in east China come to this  
38  
39 hospital and receive treatment there. Patients were eligible in the study if they (a) were 18  
40  
41 years or older, (b) had been diagnosed with lung cancer, (c) had an expected survival time > 3  
42  
43 months, (d) had no significant cognitive impairment, and (e) were able to communicate with  
44  
45 interviewers. Those who could not understand the questions were excluded from the sample.  
46  
47  
48 Between June 2016 and July 2016, 328 patients met the inclusion criteria and were enrolled  
49  
50  
51 in the study.  
52

53  
54 Data collection was conducted by trained undergraduate students majoring in  
55  
56 medicine and public health. Doctors and nurses at the inpatient unit of department of chest-  
57



## COPING, MOOD AND HRQOL IN LUNG CANCER PATIENTS

1  
2  
3 oncology medicine recommended the eligible patients, and researcher approached them and  
4 introduced the study. Those who agreed to participate in the study provided informed consent.  
5  
6 Face-to-face interviews were then conducted. Disease and treatment information was  
7  
8 extracted from medical records. The study was approved by the Ethics Committee of  
9  
10 Shanghai Chest Hospital, Shanghai Jiao Tong University (No. KS1353). According to our  
11  
12 study aim, we focused on 267 patients with advanced-stage lung cancer (stage III or IV), and  
13  
14 261 participants who provided full information on the main study variables (coping, mood,  
15  
16 and HRQoL) were included in the data analysis.  
17  
18  
19  
20

## 2.2 Measures

21  
22  
23 **2.2.1 Health-related quality of life.** The 5-level EuroQol 5-dimension (EQ-5D-5L)  
24  
25 was used to measure HRQoL in this study [39]. It contained five questions to assess five  
26  
27 health dimensions, as experienced in the recent days, namely mobility, self-care, usual  
28  
29 activities, pain/discomfort, and anxiety/depression. Respondents rated the severity on 5 levels:  
30  
31 “no” (1), “only a little” (2), “moderate” (3), “severe” (4), and “very severe” (5). In the current  
32  
33 study, EQ-5D-5L domain scores and overall utility index were calculated. Domain scores  
34  
35 were recoded reversely based on the original levels of each domain, with higher scores  
36  
37 indicating better quality in the domain. EQ-5D-5L utility index was calculated based on value  
38  
39 sets developed by the EuroQol Group. To our knowledge, no value sets have been developed  
40  
41 in the Chinese representative sample for the calculation of utility index, and in this study,  
42  
43 utility index was calculated based on value sets weighted from a representative sample of the  
44  
45 English general population [40]. The EQ-5D-5L utility index ranged from -1 to 1, with 1  
46  
47 representing full health, 0 representing a state of death, and negative values representing a  
48  
49 state worse than death.  
50  
51  
52  
53  
54  
55  
56  
57  
58  
59  
60

## COPING, MOOD AND HRQOL IN LUNG CANCER PATIENTS

1  
2  
3           **2.2.2 Coping.** Two subscales of the Chinese version of the Medical Coping Modes  
4 Questionnaire (MCMQ) were used to measure confrontation and resigned acceptance coping  
5 styles for lung cancer. MCMQ was developed by Feifel, Strack, and Nagy [15] among  
6 patients with a variety of life-threatening and chronic illnesses, and it is widely used for  
7 assessing coping strategies in patients in China [19, 41]. In the original questionnaire,  
8 acceptance-resignation had five items, and confrontation had eight items [15]. One item in  
9 the confrontation subscale assessing how often participants “obtained information through  
10 books, magazines, and newspapers in the past several months”, in addition to that, we added  
11 one item assessing how often participants “obtained information through the Internet and new  
12 media in the past several months”, as the Internet and new media have become important  
13 sources of information that supplement books, magazines, and newspaper. All the items were  
14 rated on a 4-point Likert scale ranging from 1 (*never*) to 4 (*very often*). The mean score of  
15 each coping style was calculated, with a higher score indicating higher probability of using  
16 that particular coping strategy. The Cronbach’s  $\alpha$  coefficients of confrontation and resigned  
17 acceptance in this study were 0.72 and 0.71, respectively.  
18  
19  
20  
21  
22  
23  
24  
25  
26  
27  
28  
29  
30  
31  
32  
33  
34  
35

36           **2.2.3 Mood.** Mood was measured using the Positive and Negative Affect Schedule  
37 (PANAS) in the current study [42]. The PANAS contained items to describe 10 positive  
38 affects (e.g., inspired, excited, determined) and 10 negative affects (e.g., afraid, upset,  
39 distressed). Respondents rated their experiences of each affect during the past two weeks on a  
40 5-point Likert scale ranging from 1 (*very slightly*) to 5 (*extremely*). The mean scores of items  
41 on the two subscales were calculated for positive mood and negative mood, respectively. In  
42 the current study, the Cronbach’s  $\alpha$  coefficients of negative mood and positive mood were  
43 0.91 and 0.86, respectively.  
44  
45  
46  
47  
48  
49  
50  
51  
52  
53

54           **2.2.4 Covariates.** Sociodemographic factors included age, gender, education  
55 (elementary school or lower, middle school, high school, college or higher), and marital  
56  
57  
58  
59  
60

## COPING, MOOD AND HRQOL IN LUNG CANCER PATIENTS

1  
2  
3 status (married, single, divorced, widowed). Perceived cancer-related financial burden was  
4  
5 assessed by the question, “Have your disease and treatment caused you and your family  
6  
7 financial difficulty”, and participants answered on a 5-point scale ranging from 0 (*No*) to 4  
8  
9 (*Very much*). Clinical factors included time of diagnosis, cancer stage, lung cancer type  
10  
11 (adenocarcinoma, squamous, poorly differentiated, small cell, not otherwise specified),  
12  
13 metastasis (none, one location, multi-locations), and received treatment (surgery,  
14  
15 chemotherapy, radiotherapy, targeted therapy).  
16  
17

### 18 **2.3 Data Analysis**

21 First, descriptive statistics were presented for sociodemographic and clinical  
22  
23 characteristics, and main study variables. Mean and standard deviation, or frequency and  
24  
25 percentage, were computed for continuous and categorical variables, respectively.  
26  
27 Independent *t* test, analysis of variance, and post-hoc comparison were conducted to analyze  
28  
29 the effect of sociodemographic and clinical factors on positive mood, negative mood, and  
30  
31 HRQoL. Correlational analyses were performed to examine the associations between the  
32  
33 continuous variables.  
34  
35  
36

37 Second, multivariate, hierarchical, linear regression analyses were employed to  
38  
39 examine the relationships among coping, mood, and HRQoL. The stepwise regressions with  
40  
41 HRQoL (domain scores and EQ-5D utility index) as dependent variable involved three steps:  
42  
43 In step one, gender, age, cancer stage, and covariates that were significantly correlated with  
44  
45 mood and HRQoL (i.e., financial burden, poorly differentiated lung cancer, small cell lung  
46  
47 cancer, received radiotherapy) were entered; In step two, confrontation and resigned  
48  
49 acceptance were entered; In step three, positive and negative mood were entered.  
50  
51  
52

53 Third, the mediating effects of positive and negative mood in the relationship between  
54  
55 coping and HRQoL were tested using the *MEDIATE* macro for SPSS developed by Preacher  
56  
57

1  
2  
3 and Hayes [43]. Bootstrapping techniques using 5000 samples were used for the analysis,  
4  
5 which was regarded as providing a more reliable estimate for the small sample size.

6  
7 Significant indirect effect was indicated by a 95% confidence interval of indirect effect  
8  
9 without zero. All tests were two tailed, and a  $p$ -value of  $<0.05$  was considered statistically  
10  
11 significant.  
12

### 13 14 **3. Results**

#### 15 16 17 **3.1 Sociodemographic and Clinical Characteristics**

18  
19 The sociodemographic and clinical characteristics for the samples are shown in Table  
20  
21 1. A total sample of 261 participants had a mean age of 59.99 years ( $SD = 9.53$ ). Males  
22  
23 represented 70.1% of the samples. Most participants were married (94.6%) and perceived a  
24  
25 slight to very severe cancer-related financial burden (85.8%). More than half of the  
26  
27 participants had been diagnosed in the past 6 months (55.2%), and multi-locations metastasis  
28  
29 was present in 29.1% of the participants. More than 90% of the participants received  
30  
31 chemotherapy (96.6%), whereas a certain proportion had ever received surgery (23.4%),  
32  
33 radiotherapy (23.4%), or targeted therapy (14.6%).  
34  
35  
36  
37  
38  
39  
40  
41  
42  
43  
44  
45  
46  
47  
48  
49  
50  
51  
52  
53  
54  
55  
56  
57  
58  
59  
60

## COPING, MOOD AND HRQOL IN LUNG CANCER PATIENTS

Table 1 Sample Characteristics

| Variables                                        | M(SD) / n (%) | Positive mood | Negative mood | Mobility    | Self-care   | Usual activities | Pain/discomfort | Anxiety/depression | EQ-5D utility index |
|--------------------------------------------------|---------------|---------------|---------------|-------------|-------------|------------------|-----------------|--------------------|---------------------|
| <b>Age (years)</b>                               | 59.99 (9.53)  |               |               |             |             |                  |                 |                    |                     |
| <b>Gender</b>                                    |               |               |               |             |             |                  |                 |                    |                     |
| Male                                             | 183 (70.1%)   | 2.41 (0.75)   | 1.80 (0.73)   | 4.39 (0.95) | 4.63 (0.79) | 4.33 (0.92)      | 4.03 (0.87)     | 4.24 (0.75)        | 0.81 (0.17)         |
| Female                                           | 78 (29.9%)    | 2.34 (0.78)   | 1.93 (0.83)   | 4.21 (1.04) | 4.50 (0.96) | 4.06 (1.05)      | 3.91 (0.87)     | 4.21 (0.65)        | 0.78 (0.21)         |
| <b>Education</b>                                 |               |               |               |             |             |                  |                 |                    |                     |
| Elementary school or lower                       | 55 (21.1%)    | 2.28 (0.79)   | 1.82 (0.73)   | 4.54 (0.92) | 4.64 (0.80) | 4.31 (0.96)      | 3.98 (0.91)     | 4.11 (0.74)        | 0.80 (0.18)         |
| Middle school                                    | 91 (34.9%)    | 2.35 (0.69)   | 1.94 (0.79)   | 4.24 (0.96) | 4.57 (0.86) | 4.14 (1.04)      | 3.90 (0.87)     | 4.16 (0.79)        | 0.78 (0.19)         |
| High school                                      | 66 (25.3%)    | 2.46 (0.77)   | 1.71 (0.63)   | 4.32 (1.08) | 4.59 (0.89) | 4.29 (0.96)      | 4.05 (0.79)     | 4.32 (0.66)        | 0.82 (0.17)         |
| College or higher                                | 49 (18.8%)    | 2.51 (0.84)   | 1.83 (0.88)   | 4.41 (0.96) | 4.59 (0.84) | 4.35 (0.86)      | 4.10 (0.94)     | 4.35 (0.63)        | 0.83 (0.20)         |
| <b>Marital status</b>                            |               |               |               |             |             |                  |                 |                    |                     |
| Married                                          | 247 (94.6%)   | 2.40 (0.77)   | 1.83 (0.76)   | 4.34 (0.98) | 4.60 (0.85) | 4.25 (0.98)      | 3.98 (0.89)     | 4.23 (0.71)        | 0.80 (0.19)         |
| Single/divorced/<br>widowed                      | 14 (5.4%)     | 2.23 (0.58)   | 1.86 (0.82)   | 4.21 (1.05) | 4.57 (0.85) | 4.29 (0.83)      | 4.21 (0.58)     | 4.07 (1.00)        | 0.78 (0.18)         |
| <b>Perceived cancer-related financial burden</b> |               |               |               |             |             |                  |                 |                    |                     |
| None                                             | 37 (14.2%)    | 2.72 (0.89)   | 1.47 (0.50)   | 4.86 (0.42) | 4.92 (0.28) | 4.81 (0.46)      | 4.51 (0.56)     | 4.59 (0.50)        | 0.92 (0.08)         |

## COPING, MOOD AND HRQOL IN LUNG CANCER PATIENTS

|    |                             |             |             |             |             |             |             |             |             |             |
|----|-----------------------------|-------------|-------------|-------------|-------------|-------------|-------------|-------------|-------------|-------------|
| 5  | Slight                      | 100 (38.3%) | 2.27 (0.74) | 1.74 (0.63) | 4.21 (1.09) | 4.54 (0.88) | 4.23 (0.91) | 3.91 (0.79) | 4.22 (0.56) | 0.78 (0.19) |
| 7  | Moderate                    | 63 (24.1%)  | 2.53 (0.80) | 1.87 (0.74) | 4.43 (0.86) | 4.65 (0.79) | 4.17 (0.98) | 3.90 (0.93) | 4.27 (0.70) | 0.80 (0.18) |
| 8  | Severe                      | 36 (13.8%)  | 2.16 (0.51) | 1.94 (0.84) | 4.25 (0.77) | 4.64 (0.68) | 4.22 (0.90) | 4.06 (1.01) | 4.19 (0.71) | 0.82 (0.14) |
| 10 | Very Severe                 | 25 (9.6%)   | 2.38 (0.62) | 2.52 (1.02) | 3.96 (1.34) | 4.12 (1.33) | 3.76 (1.42) | 3.68 (0.95) | 3.64 (1.19) | 0.68 (0.26) |
| 12 | <b>Time since diagnosis</b> |             |             |             |             |             |             |             |             |             |
| 15 | Less than 6 months          | 144 (55.2%) | 2.38 (0.77) | 1.84 (0.77) | 4.40 (0.96) | 4.60 (0.84) | 4.24 (1.02) | 3.95 (0.90) | 4.19 (0.76) | 0.80 (0.19) |
| 17 | 6-12months                  | 32 (12.3%)  | 2.54 (0.68) | 1.91 (0.72) | 4.19 (1.28) | 4.50 (1.05) | 4.19 (1.12) | 4.19 (0.78) | 4.19 (0.82) | 0.79 (0.23) |
| 19 | 12-24 months                | 31 (11.9%)  | 2.54 (0.87) | 1.71 (0.75) | 4.35 (0.80) | 4.71 (0.53) | 4.42 (0.62) | 3.97 (0.71) | 4.32 (0.65) | 0.83 (0.11) |
| 21 | More than 24 months         | 46 (17.6%)  | 2.25 (0.72) | 1.86 (0.75) | 4.17 (1.00) | 4.48 (0.96) | 4.17 (0.93) | 3.91 (0.96) | 4.26 (0.61) | 0.78 (0.20) |
| 24 | <b>Stage</b>                |             |             |             |             |             |             |             |             |             |
| 25 | III                         | 82 (31.4%)  | 2.50 (0.71) | 1.96 (0.90) | 4.35 (0.93) | 4.55 (0.86) | 4.20 (1.09) | 3.95 (0.94) | 4.13 (0.78) | 0.79 (0.19) |
| 27 | IV                          | 179 (68.6%) | 2.34 (0.78) | 1.78 (0.68) | 4.33 (1.00) | 4.61 (0.84) | 4.28 (0.91) | 4.01 (0.84) | 4.27 (0.69) | 0.81 (0.18) |
| 29 | <b>Lung cancer type</b>     |             |             |             |             |             |             |             |             |             |
| 30 | Adenocarcinoma              | 140 (53.6%) | 2.39 (0.78) | 1.88 (0.79) | 4.28 (0.99) | 4.56 (0.85) | 4.20 (0.94) | 3.91 (0.92) | 4.18 (0.70) | 0.79 (0.19) |
| 32 | Squamous                    | 47 (18.0%)  | 2.50 (0.81) | 1.84 (0.80) | 4.45 (0.85) | 4.68 (0.63) | 4.32 (0.86) | 4.00 (0.81) | 4.26 (0.57) | 0.81 (0.14) |
| 34 | Poorly differentiated       | 24 (9.2%)   | 2.46 (0.61) | 1.77 (0.67) | 4.08 (1.25) | 4.38 (1.21) | 3.88 (1.39) | 3.75 (0.94) | 4.13 (0.99) | 0.72 (0.24) |
| 36 | Small cell                  | 43 (16.5%)  | 2.26 (0.76) | 1.76 (0.71) | 4.49 (0.96) | 4.67 (0.87) | 4.49 (0.88) | 4.26 (0.73) | 4.35 (0.78) | 0.85 (0.17) |
| 38 | Not otherwise               | 7 (2.7%)    | 2.30 (0.60) | 1.64 (0.40) | 4.71 (0.49) | 5.00 (0.00) | 4.71 (0.49) | 4.71 (0.49) | 4.57 (0.53) | 0.92 (0.10) |

1  
2  
3  
4  
5  
6  
7  
8  
9  
10  
11  
12  
13  
14  
15  
16  
17  
18  
19  
20  
21  
22  
23  
24  
25  
26  
27  
28  
29  
30  
31  
32  
33  
34  
35  
36  
37  
38  
39  
40  
41  
42  
43  
44  
45  
46  
47

## COPING, MOOD AND HRQOL IN LUNG CANCER PATIENTS

specified

**Metastasis**

|                 |             |             |             |             |             |             |             |             |             |
|-----------------|-------------|-------------|-------------|-------------|-------------|-------------|-------------|-------------|-------------|
| None            | 85 (32.6%)  | 2.43 (0.68) | 1.96 (0.88) | 4.40 (0.85) | 4.55 (0.85) | 4.25 (1.01) | 3.91 (0.91) | 4.22 (0.70) | 0.80 (0.19) |
| One location    | 100 (38.3%) | 2.40 (0.83) | 1.77 (0.78) | 4.32 (1.06) | 4.68 (0.75) | 4.35 (0.89) | 4.12 (0.78) | 4.24 (0.77) | 0.81 (0.17) |
| Multi-locations | 76 (29.1%)  | 2.34 (0.75) | 1.78 (0.57) | 4.29 (1.02) | 4.53 (0.96) | 4.13 (1.01) | 3.92 (0.93) | 4.21 (0.70) | 0.79 (0.20) |

**Treatment**

Received surgery

|     |             |             |             |             |             |             |             |             |             |
|-----|-------------|-------------|-------------|-------------|-------------|-------------|-------------|-------------|-------------|
| Yes | 61 (23.4%)  | 2.49 (0.78) | 1.95 (0.85) | 4.20 (0.98) | 4.51 (0.83) | 4.20 (0.96) | 3.97 (0.86) | 4.30 (0.74) | 0.80 (0.18) |
| No  | 200 (76.6%) | 2.36 (0.75) | 1.80 (0.73) | 4.38 (0.98) | 4.62 (0.85) | 4.27 (0.97) | 4.00 (0.88) | 4.21 (0.72) | 0.80 (0.19) |

Received chemotherapy

|     |             |             |             |             |             |             |             |             |             |
|-----|-------------|-------------|-------------|-------------|-------------|-------------|-------------|-------------|-------------|
| Yes | 252 (96.6%) | 2.40 (0.76) | 1.83 (0.76) | 4.33 (0.99) | 4.59 (0.86) | 4.25 (0.98) | 4.00 (0.87) | 4.22 (0.73) | 0.80 (0.19) |
| No  | 9 (3.4%)    | 2.16 (0.68) | 1.83 (0.72) | 4.44 (0.73) | 4.67 (0.50) | 4.33 (0.71) | 3.67 (1.00) | 4.33 (0.50) | 0.81 (0.16) |

Received radiotherapy

|     |             |             |             |             |             |             |             |             |             |
|-----|-------------|-------------|-------------|-------------|-------------|-------------|-------------|-------------|-------------|
| Yes | 61 (23.4%)  | 2.36 (0.70) | 2.04 (0.87) | 4.05 (1.19) | 4.33 (1.21) | 4.02 (1.09) | 3.74 (1.05) | 4.13 (0.62) | 0.74 (0.23) |
| No  | 200 (76.6%) | 2.40 (0.78) | 1.77 (0.71) | 4.43 (0.89) | 4.68 (0.69) | 4.33 (0.92) | 4.07 (0.80) | 4.26 (0.75) | 0.82 (0.16) |

Received targeted therapy

|     |             |             |             |             |             |             |             |             |             |
|-----|-------------|-------------|-------------|-------------|-------------|-------------|-------------|-------------|-------------|
| Yes | 38 (14.6%)  | 2.24 (0.79) | 1.83 (0.56) | 4.21 (1.14) | 4.47 (1.08) | 4.11 (1.09) | 3.79 (1.04) | 4.26 (0.64) | 0.77 (0.25) |
| No  | 223 (85.4%) | 2.42 (0.75) | 1.83 (0.79) | 4.36 (0.95) | 4.61 (0.80) | 4.28 (0.95) | 4.03 (0.84) | 4.22 (0.74) | 0.81 (0.17) |

1  
2 COPING, MOOD AND HRQOL IN LUNG CANCER PATIENTS  
3  
4  
5  
6  
7

8 Scale range: Confrontation, resigned acceptance: 1 (never) – 4 (very often); Positive mood, negative mood: 1 (very slightly) – 5 (extremely);

9  
10 Mobility, self-care, usual activities, pain/discomfort, anxiety/depression: 1 (very severe) – 5 (no); EQ-5D utility index: -1 (worse than death) – 1  
11 (full health)  
12  
13  
14  
15  
16  
17  
18  
19  
20  
21  
22  
23  
24  
25  
26  
27  
28  
29  
30  
31  
32  
33  
34  
35  
36  
37  
38  
39  
40  
41  
42  
43  
44  
45  
46  
47

For peer review only



## COPING, MOOD AND HRQOL IN LUNG CANCER PATIENTS

Age was inversely correlated with positive mood ( $r = -0.14$ ,  $p = 0.030$ ), but not with negative mood and HRQoL. Perceived cancer-related financial burden was associated with health outcomes. Patients reporting no perceived financial burden had lower negative mood, and higher levels of positive mood and HRQoL (mobility, usual activities, pain/discomfort, anxiety/depression, and EQ-5D utility index), compared with those reporting financial burden ranging from slight to severe.

Analysis of variance test found HRQoL differed in lung cancer type, as those with poorly differentiated lung cancer had slightly lower EQ-5D utility index ( $M = 0.72$ ,  $SD = 0.24$ ) compared with those with small cell lung cancer ( $M = 0.85$ ,  $SD = 0.17$ ). Moreover, independent  $t$  test showed that the HRQoL and negative mood differed significantly in terms of having received radiotherapy. Patients treated with radiotherapy showed significantly lower EQ-5D utility index ( $M = 0.74$ ,  $SD = 0.23$ ) and reported more negative affect ( $M = 20.38$ ,  $SD = 8.72$ ) than those that were not (EQ-5D utility index:  $M = 0.82$ ,  $SD = 0.16$ ; Negative mood:  $M = 17.73$ ,  $SD = 7.15$ ). Other sociodemographic and clinical characteristics did not show a significant association with mood and HRQoL.

### 3.2 Coping, Mood, and HRQoL

Pearson correlation analysis was performed to examine the relationships between coping, mood, and HRQoL (see Table 2). A positive correlation was observed between confrontation coping and positive mood ( $r = 0.21$ ). Resigned acceptance was positively correlated with negative mood ( $r = 0.46$ ), but inversely correlated with positive mood ( $r = -0.27$ ). Use of resigned acceptance was correlated with more difficulties in mobility ( $r = -0.21$ ), self-care ( $r = -0.19$ ), usual activities ( $r = -0.19$ ), pain/discomfort ( $r = -0.19$ ), anxiety/depression ( $r = -0.41$ ), and lower EQ-5D utility index ( $r = -0.28$ ).

## COPING, MOOD AND HRQOL IN LUNG CANCER PATIENTS

Table 2 Correlation among coping, affect and HRQOL

|                                | <b>M (SD)</b> | <b>1</b> | <b>2</b> | <b>3</b> | <b>4</b> | <b>5</b> | <b>6</b> | <b>7</b> | <b>8</b> | <b>9</b> |
|--------------------------------|---------------|----------|----------|----------|----------|----------|----------|----------|----------|----------|
| <b>1. Confrontation</b>        | 2.37 (0.49)   | 1        |          |          |          |          |          |          |          |          |
| <b>2. Resigned acceptance</b>  | 1.92 (0.62)   | -0.03    | 1        |          |          |          |          |          |          |          |
| <b>3. Positive mood</b>        | 2.40 (0.76)   | 0.21**   | -0.27**  | 1        |          |          |          |          |          |          |
| <b>4. Negative mood</b>        | 1.84 (0.76)   | 0.11     | 0.46**   | -0.11    | 1        |          |          |          |          |          |
| <b>5. Mobility</b>             | 4.32 (0.99)   | -0.05    | -0.21**  | 0.19**   | -0.28**  | 1        |          |          |          |          |
| <b>6. Self-care</b>            | 4.58 (0.86)   | -0.06    | -0.19**  | 0.15*    | -0.28**  | 0.78**   | 1        |          |          |          |
| <b>7. Usual activities</b>     | 4.24 (0.97)   | -0.10    | -0.19**  | 0.16*    | -0.27**  | 0.78**   | 0.73**   | 1        |          |          |
| <b>8. Pain/discomfort</b>      | 3.98 (0.87)   | -0.08    | -0.19**  | 0.14*    | -0.28**  | 0.45**   | 0.43**   | 0.46**   | 1        |          |
| <b>9. Anxiety/depression</b>   | 4.22 (0.73)   | -0.03    | -0.41**  | 0.19**   | -0.50**  | 0.21**   | 0.21**   | 0.25**   | 0.27**   | 1        |
| <b>10. EQ-5D utility index</b> | 0.80 (0.19)   | -0.10    | -0.28**  | 0.20**   | -0.38**  | 0.84**   | 0.82**   | 0.84**   | 0.69**   | 0.45**   |

\* $p < 0.05$ , \*\* $p < 0.01$

## COPING, MOOD AND HRQOL IN LUNG CANCER PATIENTS

1  
2  
3 Hierarchical regression analyses were used to examine the relationship of  
4 confrontation and resigned acceptance coping with positive mood, negative mood, and  
5 HRQoL (see Table 3). Age, gender, cancer stage, and significant covariates found in  
6 descriptive statistics, including perceived cancer-related financial burden, having received  
7 radiotherapy, and lung cancer type (poorly differentiated versus small cell), were controlled  
8 in the hierarchical regression analyses. Regarding positive mood, in addition to covariates,  
9 confrontation and resigned acceptance were found to be significant factors, as confrontation  
10 was associated with higher positive mood ( $\beta = 0.19, p = 0.002$ ), whereas resigned acceptance  
11 was associated lower positive mood ( $\beta = -0.25, p < 0.001$ ). Regarding negative mood, in  
12 addition to covariates, confrontation and resigned acceptance were significant factors, as use  
13 of confrontation ( $\beta = 0.11, p = 0.040$ ) and resigned acceptance ( $\beta = 0.44, p < 0.001$ ) were  
14 associated with higher negative mood.  
15  
16  
17  
18  
19  
20  
21  
22  
23  
24  
25  
26  
27  
28

29  
30 Regarding the EQ-5D domain scores, after controlling sociodemographic and clinical  
31 covariates, confrontation was not associated with all domains, whereas resigned acceptance  
32 was inversely associated with all domains. Positive mood was associated with less difficulty  
33 in mobility, usual activities, pain/discomfort, but not associated self-care and  
34 anxiety/depression. Negative mood was negatively associated with more difficulty in all  
35 domains.  
36  
37  
38  
39  
40  
41  
42

43 Regarding EQ-5D utility index, after controlling sociodemographic and clinical  
44 covariates, resigned acceptance was inversely associated with EQ-5D utility index ( $\beta = -0.22,$   
45  $p < 0.001$ ), whereas confrontation was not associated with EQ-5D utility index. Moreover,  
46 the effects of mood on EQ-5D utility index were significant, as positive mood was associated  
47 with higher EQ-5D utility index ( $\beta = 0.17, p = 0.005$ ), whereas negative mood was associated  
48 with lower EQ-5D utility index ( $\beta = -0.28, p < 0.001$ ).  
49  
50  
51  
52  
53  
54  
55  
56  
57

## COPING, MOOD AND HRQOL IN LUNG CANCER PATIENTS

Table 3 Multiple regression results for predictors of mood and HRQOL

|                                                      | Positive mood |                  | Negative mood |                  | Mobility  |              | Self-care |              | Usual activities |              | Pain / discomfort |              | Anxiety / depression |                  | EQ-5D utility index |                  |
|------------------------------------------------------|---------------|------------------|---------------|------------------|-----------|--------------|-----------|--------------|------------------|--------------|-------------------|--------------|----------------------|------------------|---------------------|------------------|
|                                                      | $\beta^e$     | <i>p</i>         | $\beta^e$     | <i>p</i>         | $\beta^e$ | <i>p</i>     | $\beta^e$ | <i>p</i>     | $\beta^e$        | <i>p</i>     | $\beta^e$         | <i>p</i>     | $\beta^e$            | <i>p</i>         | $\beta^e$           | <i>p</i>         |
| <b>Step 1</b>                                        |               |                  |               |                  |           |              |           |              |                  |              |                   |              |                      |                  |                     |                  |
| <b>Age</b>                                           | -0.15         | <b>0.021</b>     | -0.04         | 0.53             | -0.13     | <b>0.040</b> | -0.13     | <b>0.046</b> | -0.06            | 0.31         | -0.07             | 0.25         | 0.01                 | 0.91             | -0.10               | 0.09             |
| <b>Gender<sup>a</sup></b>                            | -0.07         | 0.32             | 0.05          | 0.40             | -0.07     | 0.29         | -0.06     | 0.35         | -0.09            | 0.15         | -0.01             | 0.85         | 0.02                 | 0.76             | -0.03               | 0.68             |
| <b>Financial burden<sup>d</sup></b>                  | -0.14         | 0.032            | 0.30          | <b>&lt;0.001</b> | -0.16     | <b>0.010</b> | -0.15     | <b>0.017</b> | -0.20            | <b>0.002</b> | -0.15             | <b>0.018</b> | -0.25                | <b>&lt;0.001</b> | -0.22               | <b>0.001</b>     |
| <b>Cancer stage<sup>b</sup></b>                      | -0.09         | 0.16             | -0.07         | 0.22             | 0.00      | 0.99         | 0.05      | 0.46         | 0.03             | 0.67         | 0.04              | 0.58         | 0.04                 | 0.51             | 0.04                | 0.53             |
| <b>Cancer type-poorly differentiated<sup>c</sup></b> | 0.01          | 0.93             | -0.03         | 0.58             | -0.07     | 0.26         | -0.08     | 0.19         | -0.12            | 0.053        | -0.08             | 0.19         | -0.04                | 0.51             | -0.14               | <b>0.027</b>     |
| <b>Cancer type-small cell<sup>c</sup></b>            | -0.08         | 0.21             | -0.01         | 0.85             | 0.05      | 0.44         | 0.03      | 0.66         | 0.08             | 0.22         | 0.14              | <b>0.025</b> | 0.07                 | 0.29             | 0.10                | 0.12             |
| <b>Received radiotherapy<sup>c</sup></b>             | -0.03         | 0.63             | 0.16          | <b>0.009</b>     | -0.17     | <b>0.006</b> | -0.19     | <b>0.003</b> | -0.14            | <b>0.026</b> | -0.20             | <b>0.002</b> | -0.07                | 0.24             | -0.20               | <b>0.001</b>     |
| <b><math>\Delta R^2</math></b>                       | 0.054         |                  | 0.141         |                  | 0.079     |              | 0.081     |              | 0.097            |              | 0.094             |              | 0.080                |                  | 0.124               |                  |
| <b>Step 2</b>                                        |               |                  |               |                  |           |              |           |              |                  |              |                   |              |                      |                  |                     |                  |
| <b>Confrontation</b>                                 | 0.19          | <b>0.002</b>     | 0.11          | <b>0.040</b>     | -0.05     | 0.40         | -0.05     | 0.39         | -0.07            | 0.25         | -0.07             | 0.29         | -0.01                | 0.81             | -0.08               | 0.17             |
| <b>Resigned acceptance</b>                           | -0.25         | <b>&lt;0.001</b> | 0.44          | <b>&lt;0.001</b> | -0.16     | <b>0.013</b> | -0.15     | <b>0.019</b> | -0.16            | <b>0.012</b> | -0.14             | <b>0.029</b> | -0.41                | <b>&lt;0.001</b> | -0.22               | <b>&lt;0.001</b> |

COPING, MOOD AND HRQOL IN LUNG CANCER PATIENTS

1  
2  
3  
4  
5  
6  
7  
8  
9  
10  
11  
12  
13  
14  
15  
16  
17  
18  
19  
20  
21  
22  
23  
24  
25  
26  
27  
28  
29  
30  
31  
32  
33  
34  
35  
36  
37  
38  
39  
40  
41  
42  
43  
44  
45  
46  
47

|                               |       |       |       |              |       |              |       |              |       |              |       |                  |       |                  |
|-------------------------------|-------|-------|-------|--------------|-------|--------------|-------|--------------|-------|--------------|-------|------------------|-------|------------------|
| $\Delta R^2$                  | 0.098 | 0.191 | 0.025 | 0.023        | 0.027 | 0.021        | 0.155 | 0.053        |       |              |       |                  |       |                  |
| <b>Step 3</b>                 |       |       |       |              |       |              |       |              |       |              |       |                  |       |                  |
| <b>Positive mood</b>          |       |       | 0.16  | <b>0.013</b> | 0.12  | 0.078        | 0.14  | <b>0.026</b> | 0.14  | <b>0.029</b> | 0.10  | 0.076            | 0.17  | <b>0.005</b>     |
| <b>Negative mood</b>          |       |       | -0.22 | <b>0.003</b> | -0.20 | <b>0.006</b> | -0.17 | <b>0.020</b> | -0.20 | <b>0.005</b> | -0.36 | <b>&lt;0.001</b> | -0.28 | <b>&lt;0.001</b> |
| $\Delta R^2$                  |       |       | 0.053 |              | 0.039 |              | 0.036 |              | 0.044 |              | 0.093 |                  | 0.076 |                  |
| <b>Adjusted R<sup>2</sup></b> | 0.120 | 0.307 | 0.118 | 0.103        | 0.122 | 0.121        | 0.298 | 0.218        |       |              |       |                  |       |                  |

Note. a. 0=Male, 1=Female; b. 1=stage III, 2=stage IV; c. 0=No, 1=Yes; d. range:1 (no difficulty) – 5 (very much); e. standardized coefficients

For Peer review only

### 3.3 Mediating Effect of Mood on the Association between Coping and HRQoL

The MEDIANTE macro was used to examine the mediating effect of mood in the relationship between coping and HRQoL, controlling for age, gender, cancer stage, perceived cancer-related financial burden, having received radiotherapy, and lung cancer type (poorly differentiated versus small cell; see Table 4). The indirect effect ( $ab$ ) was estimated as the product of regression coefficients predicting mood from each coping ( $a$ ), and HRQoL from mood ( $b$ ) (see Figure 1). Bootstrapping techniques using 5000 samples revealed significant indirect effects for confrontation and resigned acceptance on HRQoL through positive and negative mood, respectively.

Despite the total effects of confrontation on EQ-5D domains scores and utility index were not significant, competing indirect effects via mood were identified. On one hand, positive indirect effects were found for confrontation on mobility (point estimate = 0.06,  $SE$  = 0.03, 95% CI [0.01, 0.13]), usual activities (point estimate = 0.05,  $SE$  = 0.03, 95% CI [0.01, 0.12]), pain/discomfort (point estimate = 0.05,  $SE$  = 0.03, 95% CI [0.004, 0.11]), and overall utility index (point estimate = 0.01,  $SE$  = 0.01, 95% CI [0.003, 0.03]) through positive mood. On the other hand, negative indirect effects were found for confrontation on mobility (point estimate = -0.05,  $SE$  = 0.03, 95% CI [-0.12, -0.002]), pain/discomfort (point estimate = -0.04,  $SE$  = 0.02, 95% CI [-0.10, -0.001]), anxiety/depression (point estimate = -0.06,  $SE$  = 0.03, 95% CI [-0.13, -0.003]), and overall utility index (point estimate = -0.01,  $SE$  = 0.01, 95% CI [-0.03, -0.001]) via negative mood. The direct effects of confrontation on EQ-5D domains scores and utility index were not significant.

Resigned acceptance has a significant negative total effect on EQ-5D domains scores and utility index. Furthermore, indirect effects of resigned acceptance on HRQoL via positive and negative mood were identified. Use of resigned acceptance was associated with decrease

## COPING, MOOD AND HRQOL IN LUNG CANCER PATIENTS

1  
2  
3 in positive mood, and increase in negative mood, which could lead to more difficulty in  
4  
5 mobility, self-care, usual activities, pain/discomfort, anxiety/depression, and overall utility  
6  
7 index (indirect effect via positive mood: point estimate = -0.01, *SE* = 0.01, 95% CI [-0.03, -  
8  
9 0.003]; indirect effect via negative mood: point estimate = -0.04, *SE* = 0.01, 95% CI [-0.06, -  
10  
11 0.02]).  
12  
13  
14  
15  
16  
17  
18  
19  
20  
21  
22  
23  
24  
25  
26  
27  
28  
29  
30  
31  
32  
33  
34  
35  
36  
37  
38  
39  
40  
41  
42  
43  
44  
45  
46  
47  
48  
49  
50  
51  
52  
53  
54  
55  
56  
57  
58  
59  
60

For peer review only

## COPING, MOOD AND HRQOL IN LUNG CANCER PATIENTS

Table 4 Mediation model testing the direct and indirect effect of coping on HRQOL via mood

| Outcome          | Predictor           | Mediator      | Path a          | Path b          | Path ab: indirect effect of coping on HRQOL |                 | Path c': Direct effect of coping on HRQOL | Path c: Total effect of coping on HRQOL |
|------------------|---------------------|---------------|-----------------|-----------------|---------------------------------------------|-----------------|-------------------------------------------|-----------------------------------------|
|                  |                     |               | coef (se)       | coef (se)       | coef (se)                                   | 95% CI          | coef (se)                                 | coef (se)                               |
| HRQOL            | Confrontation       | Positive mood | 0.30** (0.09)   | 0.04** (0.01)   | 0.01 (0.01)                                 | [0.003, 0.03]   | -0.03 (0.02)                              | -0.03 (0.02)                            |
|                  |                     | Negative mood | 0.17* (0.08)    | -0.07*** (0.02) | -0.01 (0.01)                                | [-0.03, -0.001] |                                           |                                         |
|                  | Resigned acceptance | Positive mood | -0.31*** (0.08) |                 | -0.01 (0.01)                                | [-0.03, -0.003] | -0.02 (0.02)                              | -0.07*** (0.02)                         |
|                  |                     | Negative mood | 0.54*** (0.07)  |                 | -0.04 (0.01)                                | [-0.06, -0.02]  |                                           |                                         |
| Mobility         | Confrontation       | Positive mood | 0.30** (0.09)   | 0.21* (0.08)    | 0.06 (0.03)                                 | [0.01, 0.13]    | -0.12 (0.13)                              | -0.10 (0.12)                            |
|                  |                     | Negative mood | 0.17* (0.08)    | -0.28** (0.09)  | -0.05 (0.03)                                | [-0.12, -0.002] |                                           |                                         |
|                  | Resigned acceptance | Positive mood | -0.31*** (0.08) |                 | -0.06 (0.03)                                | [-0.13, -0.01]  | -0.03 (0.11)                              | -0.25* (0.10)                           |
|                  |                     | Negative mood | 0.54*** (0.07)  |                 | -0.15 (0.06)                                | [-0.27, -0.05]  |                                           |                                         |
| Self-care        | Confrontation       | Positive mood | 0.30** (0.09)   | 0.13 (0.07)     | 0.04 (0.03)                                 | [-0.003, 0.10]  | -0.09 (0.11)                              | -0.09 (0.11)                            |
|                  |                     | Negative mood | 0.17* (0.08)    | -0.23** (0.08)  | -0.04 (0.03)                                | [-0.10, 0.002]  |                                           |                                         |
|                  | Resigned acceptance | Positive mood | -0.31*** (0.08) |                 | -0.04 (0.03)                                | [-0.10, -0.003] | -0.04 (0.10)                              | -0.21* (0.09)                           |
|                  |                     | Negative mood | 0.54*** (0.07)  |                 | -0.14 (0.05)                                | [-0.24, -0.05]  |                                           |                                         |
| Usual Activities | Confrontation       | Positive mood | 0.30** (0.09)   | 0.18* (0.08)    | 0.05 (0.03)                                 | [0.01, 0.12]    | -0.16 (0.12)                              | -0.14 (0.12)                            |
|                  |                     | Negative mood | 0.17* (0.08)    | -0.22* (0.09)   | -0.04 (0.02)                                | [-0.09, 0.001]  |                                           |                                         |
|                  | Resigned acceptance | Positive mood | -0.31*** (0.08) |                 | -0.06 (0.03)                                | [-0.12, -0.01]  | -0.07 (0.11)                              | -0.25* (0.10)                           |
|                  |                     | Negative mood | 0.54*** (0.07)  |                 | -0.12 (0.05)                                | [-0.22, -0.02]  |                                           |                                         |



1  
2  
3  
4  
5  
6  
7  
8  
9  
10  
11  
12  
13  
14  
15  
16  
17  
18  
19  
20  
21  
22  
23  
24  
25  
26  
27  
28  
29  
30  
31  
32  
33  
34  
35  
36  
37  
38  
39  
40  
41  
42  
43  
44  
45  
46  
47

COPING, MOOD AND HRQOL IN LUNG CANCER PATIENTS

|                             |                     |                 |                 |                 |                |                 |                 |               |
|-----------------------------|---------------------|-----------------|-----------------|-----------------|----------------|-----------------|-----------------|---------------|
| <b>Pain / Discomfort</b>    | Confrontation       | Positive mood   | 0.30** (0.09)   | 0.16* (0.07)    | 0.05 (0.03)    | [0.004, 0.11]   | -0.12 (0.11)    | -0.12 (0.11)  |
|                             |                     | Negative mood   | 0.17* (0.08)    | -0.23** (0.08)  | -0.04 (0.02)   | [-0.10, -0.001] |                 |               |
| <b>Anxiety / Depression</b> | Resigned acceptance | Positive mood   | -0.31*** (0.08) |                 | -0.05 (0.03)   | [-0.11, -0.005] | -0.02 (0.10)    | -0.19* (0.09) |
|                             |                     | Negative mood   | 0.54*** (0.07)  |                 | -0.13 (0.05)   | [-0.23, -0.04]  |                 |               |
|                             | Confrontation       | Positive mood   | 0.30** (0.09)   | 0.10 (0.05)     | 0.03 (0.02)    | [-0.003, 0.74]  | 0.01 (0.08)     | -0.02 (0.08)  |
|                             |                     | Negative mood   | 0.17* (0.08)    | -0.34*** (0.06) | -0.06 (0.03)   | [-0.13, -0.003] |                 |               |
| Resigned acceptance         | Positive mood       | -0.31*** (0.08) |                 | -0.03 (0.02)    | [-0.07, 0.003] | -0.26** (0.07)  | -0.48*** (0.07) |               |
|                             | Negative mood       | 0.54*** (0.07)  |                 | -0.18 (0.04)    | [-0.27, -0.11] |                 |                 |               |

Note. Age, gender, financial burden, disease stage, cancer type, and received radiotherapy were controlled in the mediation model. All coefficients (a, b, c', c) were unstandardized coefficients. \* $p < 0.05$ , \*\* $p < 0.01$ , \*\*\* $p < 0.001$

#### 4. Discussion

To our knowledge, this is the first study to examine the relationship between coping, positive and negative mood, and HRQoL, and the mediating role of mood in the relationship between coping and HRQoL among patients with advanced lung cancer. The findings of this study indicated that examining pathway via positive and negative mood can generate a new understanding of the effect of coping on HRQoL among patients with advanced lung cancer, regardless of sociodemographic and clinical factors. The confrontation coping strategy was not directly associated with domains of HRQoL or overall HRQoL, but two significant indirect pathways via mood were identified. On one hand, confrontation had positive indirect effect on mobility, usual activities, pain, and overall HRQoL via positive mood; On the other hand, confrontation had negative indirect effect on mobility, pain, anxiety, and overall HRQoL via negative mood; Positive and negative indirect effect of confrontation on mobility, pain, and overall HRQoL could counteract, resulting in a nonsignificant total effect. In contrast, use of resigned acceptance coping was associated with an increase in negative mood and decrease in positive mood, which could in turn result in more difficulty in mobility, self-care, usual activities, pain, and poor overall HRQoL. On the whole, this is a unique finding that indicates the ambivalence of confrontation and the maladaptive nature of resigned acceptance among patients with advanced lung cancer.

Research on the effects of coping on health indicated that the way people deal with stress can predict psychological and physical health [44]. Results support this theory and suggest that coping could play a role in adapting to the diagnosis and treatment of lung cancer, which could in turn influence health outcomes. In line with previous studies indicating resigned acceptance was associated with less favorable outcomes [21, 26], the current study indicated that use of resigned acceptance was associated with increased negative mood, decreased positive mood, and lower HRQoL among the patients with

## COPING, MOOD AND HRQOL IN LUNG CANCER PATIENTS

1  
2  
3 advanced lung cancer. Although accommodative coping, such as acceptance and meaning-  
4 making coping, was suggested to be effective in dealing circumstances beyond a person's  
5 control, resigned acceptance—characterized as giving up control in the actual situation, or  
6 even other aspects of life; negative expectations about the future; and a loss of hope [24]—  
7 could still reduce positive mood, such as hope and inspiration, and contribute to the  
8 emotional distress and poor health outcomes.  
9  
10  
11  
12  
13  
14  
15

16 Confrontation was found to be associated with increased positive and negative mood.  
17  
18 In the current study, confrontation was characterized by attempts such as seeking information  
19 from various sources, asking for advice from family and clinicians, and conducting shared  
20 decision making. Through such efforts, patients may regain a sense of control and redirect  
21 energy to constructive actions during treatment and daily living, which might facilitate the  
22 occurrence of positive mood. However, it is also possible that individuals could encounter  
23 various stressful decisions and pieces of information when they actively confront the  
24 advanced disease, which might lead to negative mood.  
25  
26  
27  
28  
29  
30  
31  
32  
33

34 Our findings are in line with other studies reporting a nonsignificant association  
35 between confrontation and overall HRQoL among cancer patients [21-23]. Particularly, the  
36 findings on the mediating role of mood can help to clarify the mechanisms underlying the  
37 nonsignificant association. Use of confrontation increased both positive and negative mood,  
38 which in turn were associated with overall HRQoL in opposite directions. Therefore, the  
39 coexisting positive and negative indirect effect could counteract one another, resulting in a  
40 null, or weak, total effect on overall HRQoL. We consider that this may reflect *ambivalence*  
41 of confrontation: despite that confronting the advanced cancer may have some benefits (e.g.,  
42 sense of control, constructive actions and skills), it may also remind the patients of the life-  
43 threatening disease (e.g., ruminative thoughts) and increase distress.  
44  
45  
46  
47  
48  
49  
50  
51  
52  
53  
54  
55  
56  
57  
58  
59  
60

## COPING, MOOD AND HRQOL IN LUNG CANCER PATIENTS

1  
2  
3 This study indicated that mood can be a pathway between coping and health  
4  
5 outcomes. One explanation is related to physiology of mood [45], as positive and negative  
6  
7 mood are associated with physiological levels in different directions, which can lead to  
8  
9 different health outcomes. The second explanation is related to thought-action repertoires  
10  
11 [38]. Negative mood is suggested to narrow the thought-action repertoires, and increase  
12  
13 unhealthy lifestyle and social isolation [38, 46], which could result in poor health outcomes;  
14  
15 In contrast, positive affect is suggested to broaden the scope of attention and thought-action  
16  
17 repertoires, and build up personal and social resources [38], which could be beneficial to  
18  
19 health outcomes. Another explanation is related to attributional interpretation [30]. HRQoL  
20  
21 refers to a self-perceived health status, and it is possible that participants in a negative mood  
22  
23 tend to perceive lower health status (more difficulties in daily living and symptoms) than  
24  
25 those in a positive mood.  
26  
27

28  
29 This study has some limitations. First, causality on the relationships between coping,  
30  
31 mood, and HRQoL could not be drawn out from the cross-sectional study. Second, although  
32  
33 Medical Coping Modes Questionnaire measured three coping strategies (i.e., confrontation,  
34  
35 acceptance-resignation, avoidance), reliability of avoidance, indicated by Cronbach'  $\alpha$   
36  
37 coefficient, was low in current study, which restricted us to analyze the effect of avoidance  
38  
39 strategy. Third, the sample was recruited from one hospital in China, which could  
40  
41 compromise the generalizability of the findings.  
42  
43  
44

45 Considering the effect of coping strategies, the findings of our study suggest specific  
46  
47 attention to the use of resigned acceptance among patients with advanced cancer, which was  
48  
49 associated with more negative mood and poor HRQoL. Despite patients accepting the reality  
50  
51 of disease, practitioners may assist them to regain a sense of control and develop constructive  
52  
53 and meaningful responses. Additionally, patients who actively confront the advanced cancer  
54  
55 may experience both positive and negative mood. We suggest that practitioners consider this  
56  
57

## COPING, MOOD AND HRQOL IN LUNG CANCER PATIENTS

1  
2  
3 ambivalent emotional experience and relieve patients' distress in the face of the life-  
4 threatening disease. Finally, when implementing interventions for the improvement of  
5 HRQoL, we suggest that practitioners consider the role of both positive and negative mood,  
6 which could serve as pathways between coping and HRQoL among patients with advanced  
7 lung cancer.  
8  
9  
10  
11  
12  
13

14 **Figure 1** Positive and negative mood as mediators of the association between coping and  
15 HRQoL  
16  
17

### 18 **Acknowledgements**

19  
20  
21  
22 The authors thank all the participants for their involvement, and all healthcare workers for  
23 their kind support in the study.  
24  
25  
26

### 27 **Contributors**

28  
29  
30  
31  
32  
33  
34  
35  
36  
37  
38  
39  
40  
41  
42  
43  
44  
45  
46  
47  
48  
49  
50  
51  
52  
53  
54  
55  
56  
57  
58  
59  
60  
HY, JH, LV, CJ designed the study. HY, JH, YM, ZJ, and LG collected data. HY and CJ  
analyzed the data. HY and CJ drafted the manuscript. HY, JH, YM, ZJ, LG, LV, CJ revised  
the manuscript.

### 37 **Funding**

38  
39  
40  
41  
42  
43  
44  
45  
46  
47  
48  
49  
50  
51  
52  
53  
54  
55  
56  
57  
58  
59  
60  
The study is supported by Shanghai Municipal Health Bureau Foundation (No. 201740116),  
School of Medicine of Shanghai Jiao Tong University Core Education Project (No.  
ZD150603), The Fourth Round of Three-year Action Plan on Public Health Discipline and  
Talent Program: Evidence-based Public Health and Health Economics (No.15GWZK0901)

### 49 **Competing interests**

50  
51  
52  
53  
54  
55  
56  
57  
58  
59  
60  
The authors declare that they have no conflict of interest.

### 54 **Patient consent**

## COPING, MOOD AND HRQOL IN LUNG CANCER PATIENTS

1  
2  
3  
4  
5  
6  
7  
8  
9  
10  
11  
12  
13  
14  
15  
16  
17  
18  
19  
20  
21  
22  
23  
24  
25  
26  
27  
28  
29  
30  
31  
32  
33  
34  
35  
36  
37  
38  
39  
40  
41  
42  
43  
44  
45  
46  
47  
48  
49  
50  
51  
52  
53  
54  
55  
56  
57  
58  
59  
60

Obtained.

**Data sharing statement**

No additional data were available.

**References**

1. Chen WQ, Zheng RS, Baade PD et al. Cancer Statistics in China, 2015. *Ca-a Cancer Journal for Clinicians* 2016; 66: 115-132.
2. Stewart B, Wild CP. World cancer report 2014. Health 2017.
3. Zeng HM, Zheng RS, Guo YM et al. Cancer survival in China, 2003-2005: A population-based study. *International Journal of Cancer* 2015; 136: 1921-1930.
4. Gupta D, Braun DP, Staren ED. Association between changes in quality of life scores and survival in non-small cell lung cancer patients. *European Journal of Cancer Care* 2012; 21: 614-622.
5. Maione P, Perrone F, Gallo C et al. Pretreatment quality of life and functional status assessment significantly predict survival of elderly patients with advanced non-small-cell lung cancer receiving chemotherapy: A prognostic analysis of the Multicenter Italian Lung Cancer in the Elderly Study. *Journal of Clinical Oncology* 2005; 23: 6865-6872.
6. Gana K, Broc G, Saada Y et al. Subjective wellbeing and longevity: Findings from a 22-year cohort study. *Journal of Psychosomatic Research* 2016; 85: 28-34.
7. Xu JP, Roberts RE. The Power of Positive Emotions: It's a Matter of Life or Death- Subjective Well-Being and Longevity Over 28 Years in a General Population. *Health Psychology* 2010; 29: 9-19.
8. Ma YX, Yang YP, Huang Y et al. An investigation of symptom burden and quality of life in Chinese chemo-naive advanced lung cancer patients by using the Instrument-Cloud QOL System. *Lung Cancer* 2014; 84: 301-306.
9. Schmidt K, Damm K, Prenzler A et al. Preferences of lung cancer patients for treatment and decision-making: a systematic literature review. *European Journal of Cancer Care* 2016; 25: 580-591.
10. Huang H-Y, Shi J-F, Guo L-W et al. Expenditure and financial burden for common cancers in China: a hospital-based multicentre cross-sectional study. *The Lancet* 2016; 388: S10.
11. Chouaid C, Agulnik J, Goker E et al. Health-Related Quality of Life and Utility in Patients with Advanced Non-Small-Cell Lung Cancer: A Prospective Cross-Sectional Patient Survey in a Real-World Setting. *Journal of Thoracic Oncology* 2013; 8: 997-1003.
12. Polanski J, Jankowska-Polanska B, Rosinczuk J et al. Quality of life of patients with lung cancer. *Oncotargets and Therapy* 2016; 9: 1023-1028.
13. Mosher CE, Ott MA, Hanna N et al. Coping with physical and psychological symptoms: a qualitative study of advanced lung cancer patients and their family caregivers. *Supportive Care in Cancer* 2015; 23: 2053-2060.
14. Nipp RD, Greer JA, El-Jawahri A et al. Coping and Prognostic Awareness in Patients With Advanced Cancer. *Journal of Clinical Oncology* 2017; 35: 2551-+.

## COPING, MOOD AND HRQOL IN LUNG CANCER PATIENTS

15. Feifel H, Strack S, Nagy VT. Coping strategies and associated features of medically ill patients. *Psychosomatic Medicine* 1987; 49: 616-625.
16. Hong JF, Wei ZZ, Wang WL. Preoperative psychological distress, coping and quality of life in Chinese patients with newly diagnosed gastric cancer. *Journal of Clinical Nursing* 2015; 24: 2439-2447.
17. van Laarhoven HWM, Schilderman J, Bleijenberg G et al. Coping, Quality of Life, Depression, and Hopelessness in Cancer Patients in a Curative and Palliative, End-of-Life Care Setting. *Cancer Nursing* 2011; 34: 302-314.
18. Sorato DB, Osorio FL. Coping, psychopathology, and quality of life in cancer patients under palliative care. *Palliative & Supportive Care* 2015; 13: 517-525.
19. Wu XD, Qin HY, Zhang JE et al. The prevalence and correlates of symptom distress and quality of life in Chinese oesophageal cancer patients undergoing chemotherapy after radical oesophagectomy. *European Journal of Oncology Nursing* 2015; 19: 502-508.
20. Ma YM, Ba CF, Wang YB. Analysis of factors affecting the life quality of the patients with late stomach cancer. *Journal of Clinical Nursing* 2014; 23: 1257-1262.
21. Xu L, Pan QO, Lin RQ. Prevalence rate and influencing factors of preoperative anxiety and depression in gastric cancer patients in China: Preliminary study. *Journal of International Medical Research* 2016; 44: 377-388.
22. He GP, Liu S. Quality of life and coping styles in Chinese nasopharyngeal cancer patients after hospitalization. *Cancer Nursing* 2005; 28: 179-186.
23. Nipp RD, El-Jawahri A, Fishbein JN et al. The relationship between coping strategies, quality of life, and mood in patients with incurable cancer. *Cancer* 2016; 122: 2110-2116.
24. Nakamura YM, Orth U. Acceptance as a coping reaction: adaptive or not? *Swiss Journal of Psychology* 2005; 64: 281-292.
25. Feifel H, Strack S, Nagy VT. Degree of life-threat and differential use of coping modes. *Journal of Psychosomatic Research* 1987; 31: 91-99.
26. Hack TF, Degner LF. Coping responses following breast cancer diagnosis predict psychological adjustment three years later. *Psycho-Oncology* 2004; 13: 235-247.
27. Yeung NCY, Lu Q. Affect mediates the association between mental adjustment styles and quality of life among Chinese cancer survivors. *Journal of Health Psychology* 2014; 19: 1420-1429.
28. Park CL, Iacocca MO. A stress and coping perspective on health behaviors: theoretical and methodological considerations. *Anxiety, Stress, & Coping* 2014; 27: 123-137.
29. Drach-Zahavy A, Somech A. Coping with health problems: the distinctive relationships of Hope sub-scales with constructive thinking and resource allocation. *Personality and Individual Differences* 2002; 33: 103-117.
30. Billings DW, Folkman S, Acree M, Moskowitz JT. Coping and physical health during caregiving: The roles of positive and negative affect. *Journal of Personality and Social Psychology* 2000; 79: 131-142.
31. Katter JKQ, Greenglass E. The Influence of Mood on the Relation between Proactive Coping and Rehabilitation Outcomes. *Canadian Journal on Aging-Revue Canadienne Du Vieillissement* 2013; 32: 13-20.
32. Rueda B, Perez-Garcia AM. Coping strategies, depressive symptoms and quality of life in hypertensive patients: Mediation and prospective relations. *Psychology & Health* 2013; 28: 1152-1170.
33. Hirsch JK, Floyd AR, Duberstein PR. Perceived health in lung cancer patients: the role of positive and negative affect. *Quality of Life Research* 2012; 21: 187-194.

## COPING, MOOD AND HRQOL IN LUNG CANCER PATIENTS

- 1
- 2
- 3 34. Weitzner MA, Meyers CA, Stuebing KK, Saleeba AK. Relationship between quality of
- 4 life and mood in long-term survivors of breast cancer treated with mastectomy. *Supportive*
- 5 *Care in Cancer* 1997; 5: 241-248.
- 6 35. Stellar JE, John-Henderson N, Anderson CL et al. Positive Affect and Markers of
- 7 Inflammation: Discrete Positive Emotions Predict Lower Levels of Inflammatory Cytokines.
- 8 *Emotion* 2015; 15: 129-133.
- 9 36. Messay B, Lim A, Marsland AL. Current understanding of the bi-directional
- 10 relationship of major depression with inflammation. *Biology of Mood & Anxiety Disorders*
- 11 *2012*; 2.
- 12 37. Fredrickson BL. The broaden-and-build theory of positive emotions. *Philosophical*
- 13 *Transactions of the Royal Society of London Series B-Biological Sciences* 2004; 359: 1367-
- 14 1377.
- 15 38. Garland EL, Fredrickson B, Kring AM et al. Upward spirals of positive emotions
- 16 counter downward spirals of negativity: Insights from the broaden-and-build theory and
- 17 affective neuroscience on the treatment of emotion dysfunctions and deficits in
- 18 psychopathology. *Clinical Psychology Review* 2010; 30: 849-864.
- 19 39. Luo N, Li MH, Liu GG et al. Developing the Chinese version of the new 5-level EQ-5D
- 20 descriptive system: the response scaling approach. *Quality of Life Research* 2013; 22: 885-
- 21 890.
- 22 40. Feng Y, Devlin N, Shah K et al. New methods for modelling EQ-5D-5L value sets: an
- 23 application to English data. 2016.
- 24 41. Deng MH, Lan YH, Luo SL. Quality of life estimate in stomach, colon, and rectal
- 25 cancer patients in a hospital in China. *Tumor Biology* 2013; 34: 2809-2815.
- 26 42. Watson D, Clark LA, Tellegen A. Development and validation of brief measures of
- 27 positive and negative affect-The PANAS scales. *Journal of Personality and Social Psychology*
- 28 *1988*; 54: 1063-1070.
- 29 43. Preacher KJ, Hayes AF. Asymptotic and resampling strategies for assessing and
- 30 comparing indirect effects in multiple mediator models. *Behavior research methods* 2008;
- 31 *40*: 879-891.
- 32 44. Aldwin CM, Park CL. Coping and physical health outcomes: An overview. *Psychology*
- 33 *& Health* 2004; 19: 277-281.
- 34 45. Trudel-Fitzgerald C, Qureshi F, Appleton AA, Kubzansky LD. A healthy mix of
- 35 emotions: underlying biological pathways linking emotions to physical health. *Current*
- 36 *Opinion in Behavioral Sciences* 2017; 15: 16-21.
- 37 46. Walker MS, Larsen RJ, Zona DM et al. Smoking urges and relapse among lung cancer
- 38 patients: findings from a preliminary retrospective study. *Preventive Medicine* 2004; 39:
- 39 449-457.
- 40
- 41
- 42
- 43
- 44
- 45
- 46
- 47
- 48
- 49
- 50
- 51
- 52
- 53
- 54
- 55
- 56
- 57
- 58
- 59
- 60



1  
2  
3  
4  
5  
6  
7  
8  
9  
10  
11  
12  
13  
14  
15  
16  
17  
18  
19  
20  
21  
22  
23  
24  
25  
26  
27  
28  
29  
30  
31  
32  
33  
34  
35  
36  
37  
38  
39  
40  
41  
42  
43  
44  
45  
46  
47  
48  
49  
50  
51  
52  
53  
54  
55  
56  
57  
58  
59  
60

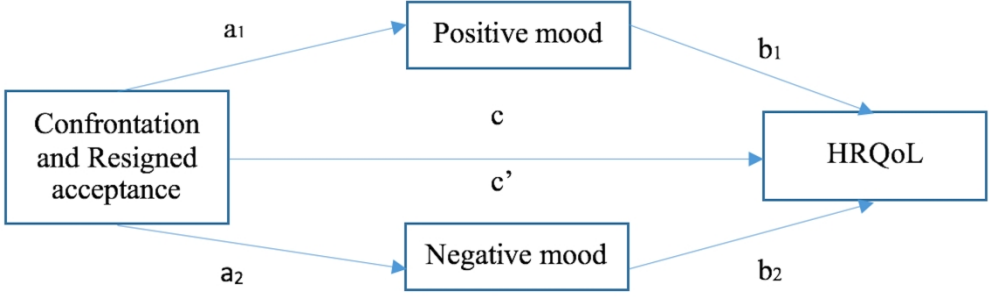

Positive and negative mood as mediators of the association between coping and HRQoL

### The STROBE-Vet statement checklist.

| <b>Item</b>                     | <b>STROBE-Vet recommendation</b> | <b>Page #</b>                                                                                                                                |          |
|---------------------------------|----------------------------------|----------------------------------------------------------------------------------------------------------------------------------------------|----------|
| <b>Title and Abstract</b>       | 1                                | (a) Indicate that the study was an observational study and, if applicable, use a common study design term                                    | 1        |
|                                 |                                  | (b) Indicate why the study was conducted, the design, the results, the limitations, and the relevance of the findings                        | 2        |
| <b>Background / rationale</b>   | 2                                | Explain the scientific background and rationale for the investigation being reported                                                         | 4-5      |
| <b>Objectives</b>               | 3                                | (a) State specific objectives, including any primary or secondary prespecified hypotheses or their absence                                   | 6        |
|                                 |                                  | (b) Ensure that the level of organization <sup>a</sup> is clear for each objective and hypothesis                                            | 4-6      |
| <b>Study design</b>             | 4                                | Present key elements of study design early in the paper                                                                                      | 6        |
| <b>Setting</b>                  | 5                                | (a) Describe the setting, locations, and relevant dates, including periods of recruitment, exposure, follow-up, and data collection          | 6        |
|                                 |                                  | (b) If applicable, include information at each level of organization                                                                         |          |
| <b>Participants<sup>b</sup></b> | 6                                | (a) Describe the eligibility criteria for the owners/managers and for the animals, at each relevant level of organization                    | 6        |
|                                 |                                  | (b) Describe the sources and methods of selection for the owners/managers and for the animals, at each relevant level of organization        | 6        |
|                                 |                                  | (c) Describe the method of follow-up                                                                                                         | —        |
|                                 |                                  | (d) For matched studies, describe matching criteria and the number of matched individuals per subject (e.g., number of controls per case)    | —        |
| <b>Variables</b>                | 7                                | (a) Clearly define all outcomes, exposures, predictors, potential confounders, and effect modifiers. If applicable, give diagnostic criteria | 7-8      |
|                                 |                                  | (b) Describe the level of organization at which each variable was measured                                                                   | 7-8      |
|                                 |                                  | (c) For hypothesis-driven studies, the putative causal-structure among variables should be described (a diagram is strongly encouraged)      | Figure 1 |

|                                   |     |                                                                                                                                                                                                                                                                                                       |                |
|-----------------------------------|-----|-------------------------------------------------------------------------------------------------------------------------------------------------------------------------------------------------------------------------------------------------------------------------------------------------------|----------------|
| <b>Data sources / measurement</b> | 8*  | (a) For each variable of interest, give sources of data and details of methods of assessment (measurement). If applicable, describe comparability of assessment methods among groups and over time                                                                                                    | 7-8            |
|                                   |     | (b) If a questionnaire was used to collect data, describe its development, validation, and administration                                                                                                                                                                                             | 7-8            |
|                                   |     | (c) Describe whether or not individuals involved in data collection were blinded, when applicable                                                                                                                                                                                                     | -              |
|                                   |     | (d) Describe any efforts to assess the accuracy of the data (including methods used for "data cleaning" in primary research, or methods used for validating secondary data)                                                                                                                           | -              |
| <b>Bias</b>                       | 9   | Describe any efforts to address potential sources of bias due to confounding, selection, or information bias                                                                                                                                                                                          | 8 (covariates) |
| <b>Study size</b>                 | 10  | (a) Describe how the study size was arrived at for each relevant level of organization                                                                                                                                                                                                                | -              |
|                                   |     | (b) Describe how non-independence of measurements was incorporated into sample-size considerations, if applicable                                                                                                                                                                                     | -              |
|                                   |     | (c) If a formal sample-size calculation was used, describe the parameters, assumptions, and methods that were used, including a justification for the effect size selected                                                                                                                            | -              |
| <b>Quantitative variables</b>     | 11  | Explain how quantitative variables were handled in the analyses. If applicable, describe which groupings were chosen, and why                                                                                                                                                                         | 7-8            |
| <b>Statistical methods</b>        | 12  | (a) Describe all statistical methods for each objective, at a level of detail sufficient for a knowledgeable reader to replicate the methods. Include a description of the approaches to variable selection, control of confounding, and methods used to control for non-independence of observations | 9              |
|                                   |     | (b) Describe the rationale for examining subgroups and interactions and the methods used                                                                                                                                                                                                              | -              |
|                                   |     | (c) Explain how missing data were addressed                                                                                                                                                                                                                                                           | 6              |
|                                   |     | (d) If applicable, describe the analytical approach to loss to follow-up, matching, complex sampling, and multiplicity of analyses                                                                                                                                                                    | -              |
|                                   |     | (e) Describe any methods used to assess the robustness of the analyses (e.g., sensitivity analyses or quantitative bias assessment)                                                                                                                                                                   | -              |
|                                   |     |                                                                                                                                                                                                                                                                                                       |                |
| <b>Participants</b>               | 13* | (a) Report the numbers of owners/managers and animals at each stage of study and at each relevant level of organization - e.g., numbers eligible, included in the study, completing follow-up, and analyzed                                                                                           | 6              |

|                                                                |     |                                                                                                                                                                                                                                                   |                   |
|----------------------------------------------------------------|-----|---------------------------------------------------------------------------------------------------------------------------------------------------------------------------------------------------------------------------------------------------|-------------------|
|                                                                |     | (b) Give reasons for non-participation at each stage and at each relevant level of organization                                                                                                                                                   | -                 |
|                                                                |     | (c) Consider use of a flow diagram and/or a diagram of the organizational structure                                                                                                                                                               | -                 |
| <b>Descriptive data on exposures and potential confounders</b> | 14* | (a) Give characteristics of study participants (e.g., demographic, clinical, social) and information on exposures and potential confounders by group and level of organization, if applicable                                                     | 11                |
|                                                                |     | (b) Indicate number of participants with missing data for each variable of interest and at all relevant levels of organization                                                                                                                    | 7                 |
|                                                                |     | (c) Summarize follow-up time (e.g., average and total amount), if appropriate to the study design                                                                                                                                                 | -                 |
| <b>Outcome data</b>                                            | 15* | (a) Report outcomes as appropriate for the study design and summarize at all relevant levels of organization                                                                                                                                      | 10-23             |
|                                                                |     | (b) For proportions and rates, report the numerator and denominator                                                                                                                                                                               | 11-14,16,18,19,22 |
|                                                                |     | (c) For continuous outcomes, report the number of observations and a measure of variability                                                                                                                                                       | 11-14,16,18,19,22 |
| <b>Main results</b>                                            | 16  | (a) Give unadjusted estimates and, if applicable, adjusted estimates and their precision (e.g., 95% confidence interval). Make clear which confounders and interactions were adjusted. Report all relevant parameters that were part of the model | 11-14,16,18,19,22 |
|                                                                |     | (b) Report category boundaries when continuous variables were categorized                                                                                                                                                                         | -                 |
|                                                                |     | (c) If relevant, consider translating estimates of relative risk into absolute risk for a meaningful time period                                                                                                                                  | -                 |
| <b>Other analyses</b>                                          | 17  | Report other analyses done, such as sensitivity/robustness analysis and analysis of subgroups                                                                                                                                                     | -                 |
| <b>Key results</b>                                             | 18  | Summarize key results with reference to study objectives                                                                                                                                                                                          | 24                |
| <b>Strengths and Limitations</b>                               | 19  | Discuss strengths and limitations of the study, taking into account sources of potential bias or imprecision. Discuss both direction and magnitude of any potential bias                                                                          | 24, 26            |
| <b>Interpretation</b>                                          | 20  | Give a cautious overall interpretation of results considering objectives, limitations, multiplicity of analyses, results from similar studies, and other relevant evidence                                                                        | 24-26             |
| <b>Generalizability</b>                                        | 21  | Discuss the generalizability (external validity) of the study results                                                                                                                                                                             | 26                |

1  
2  
3  
4  
5  
6  
7  
8  
9  
10  
11  
12  
13  
14  
15  
16  
17  
18  
19  
20  
21  
22  
23  
24  
25  
26  
27  
28  
29  
30  
31  
32  
33  
34  
35  
36  
37  
38  
39  
40  
41  
42  
43  
44  
45  
46  
47

|                                 |    |                                                                                                                                                                                                                                                                                                                                                                                                                                                                                                                                                                                                               |    |
|---------------------------------|----|---------------------------------------------------------------------------------------------------------------------------------------------------------------------------------------------------------------------------------------------------------------------------------------------------------------------------------------------------------------------------------------------------------------------------------------------------------------------------------------------------------------------------------------------------------------------------------------------------------------|----|
| <b>Funding<br/>Transparency</b> | 22 | <p>(a) Funding- Give the source of funding and the role of the funders for the present study and, if applicable, for the original study on which the present article is based</p> <p>(b) Conflicts of interest-Describe any conflicts of interest, or lack thereof, for each author</p> <p>(c) Describe the authors' roles- Provision of an authors' declaration of transparency is recommended</p> <p>(d) Ethical approval- Include information on ethical approval for use of animal and human subjects</p> <p>(e) Quality standards-Describe any quality standards used in the conduct of the research</p> | 27 |
|---------------------------------|----|---------------------------------------------------------------------------------------------------------------------------------------------------------------------------------------------------------------------------------------------------------------------------------------------------------------------------------------------------------------------------------------------------------------------------------------------------------------------------------------------------------------------------------------------------------------------------------------------------------------|----|

<sup>a</sup> Level of organization recognizes that observational studies in veterinary research often deal with repeated measures (within an animal or herd) or animals that are maintained in groups (such as pens and herds); thus, the observations are not statistically independent. This non-independence has profound implications for the design, analysis, and results of these studies.

<sup>b</sup> The word "participant" is used in the STROBE statement. However, for the veterinary version, it is understood that "participant" should be addressed for both the animal owner/manager and for the animals themselves.

\*Give such information separately for cases and controls in case-control studies and, if applicable, for exposed and unexposed groups in cohort and cross-sectional studies.

Peer review only

# BMJ Open

## Mood mediates coping and health-related quality of life: A cross-sectional study in Chinese patients with advanced lung cancer

|                                                                                                                                                                                                              |                                                                                                                                                                                                                                                                                                                                                                                                                                                                                                                                                                                                                                                                                                                                                                                                                                                                                                                                                                                                                                                                                                                                                                                                             |
|--------------------------------------------------------------------------------------------------------------------------------------------------------------------------------------------------------------|-------------------------------------------------------------------------------------------------------------------------------------------------------------------------------------------------------------------------------------------------------------------------------------------------------------------------------------------------------------------------------------------------------------------------------------------------------------------------------------------------------------------------------------------------------------------------------------------------------------------------------------------------------------------------------------------------------------------------------------------------------------------------------------------------------------------------------------------------------------------------------------------------------------------------------------------------------------------------------------------------------------------------------------------------------------------------------------------------------------------------------------------------------------------------------------------------------------|
| Journal:                                                                                                                                                                                                     | <i>BMJ Open</i>                                                                                                                                                                                                                                                                                                                                                                                                                                                                                                                                                                                                                                                                                                                                                                                                                                                                                                                                                                                                                                                                                                                                                                                             |
| Manuscript ID                                                                                                                                                                                                | bmjopen-2018-023672.R1                                                                                                                                                                                                                                                                                                                                                                                                                                                                                                                                                                                                                                                                                                                                                                                                                                                                                                                                                                                                                                                                                                                                                                                      |
| Article Type:                                                                                                                                                                                                | Research                                                                                                                                                                                                                                                                                                                                                                                                                                                                                                                                                                                                                                                                                                                                                                                                                                                                                                                                                                                                                                                                                                                                                                                                    |
| Date Submitted by the Author:                                                                                                                                                                                | 16-Aug-2018                                                                                                                                                                                                                                                                                                                                                                                                                                                                                                                                                                                                                                                                                                                                                                                                                                                                                                                                                                                                                                                                                                                                                                                                 |
| Complete List of Authors:                                                                                                                                                                                    | <p>He, Yaping; Shanghai Jiao Tong University, School of Public Health; Shanghai Jiao Tong University, Center for Health Technology Assessment, Shanghai Jiao Tong University China Hospital Development Institute</p> <p>Jian, Hong; Shanghai Chest Hospital, Shanghai Jiao Tong University, Department of Oncology</p> <p>Yan, Meiqiong; Shanghai Chest Hospital, Shanghai Jiao Tong University, Department of Oncology</p> <p>Zhu, Jingfen; Shanghai Jiao Tong University, School of Public Health; Shanghai Jiao Tong University, Center for Health Technology Assessment, Shanghai Jiao Tong University China Hospital Development Institute</p> <p>Li, Guohong; Shanghai Jiao Tong University, School of Public Health; Shanghai Jiao Tong University, Center for Health Technology Assessment, Shanghai Jiao Tong University China Hospital Development Institute</p> <p>Lou, Vivian W. Q.; The University of Hong Kong, Department of Social Work &amp; Social Administration; The University of Hong Kong, Sau Po Centre on Ageing</p> <p>Chen, Jieling; The University of Hong Kong, Department of Social Work and Social Administration; The University of Hong Kong, Sau Po Centre on Ageing</p> |
| <b>Primary Subject Heading</b>:                                                                                                                                                                              | Oncology                                                                                                                                                                                                                                                                                                                                                                                                                                                                                                                                                                                                                                                                                                                                                                                                                                                                                                                                                                                                                                                                                                                                                                                                    |
| Secondary Subject Heading:                                                                                                                                                                                   | Patient-centred medicine                                                                                                                                                                                                                                                                                                                                                                                                                                                                                                                                                                                                                                                                                                                                                                                                                                                                                                                                                                                                                                                                                                                                                                                    |
| Keywords:                                                                                                                                                                                                    | coping, quality of life, lung cancer, mood                                                                                                                                                                                                                                                                                                                                                                                                                                                                                                                                                                                                                                                                                                                                                                                                                                                                                                                                                                                                                                                                                                                                                                  |
| <p>Note: The following files were submitted by the author for peer review, but cannot be converted to PDF. You must view these files (e.g. movies) online.</p> <p>STROBE_checklist_BMJ-Open_combined.doc</p> |                                                                                                                                                                                                                                                                                                                                                                                                                                                                                                                                                                                                                                                                                                                                                                                                                                                                                                                                                                                                                                                                                                                                                                                                             |

1  
2  
3  
4  
5  
6  
7  
8  
9  
10  
11  
12  
13  
14  
15  
16  
17  
18  
19  
20  
21  
22  
23  
24  
25  
26  
27  
28  
29  
30  
31  
32  
33  
34  
35  
36  
37  
38  
39  
40  
41  
42  
43  
44  
45  
46  
47  
48  
49  
50  
51  
52  
53  
54  
55  
56  
57  
58  
59  
60

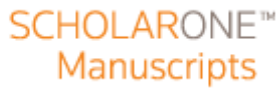

## COPING, MOOD AND HRQOL IN LUNG CANCER PATIENTS

Mood mediates coping and health-related quality of life: A cross-sectional study in Chinese patients with advanced lung cancer

He, Yaping<sup>1,2</sup>

Jian, Hong<sup>3</sup>

Yan, Meiqiong<sup>3</sup>

Zhu, Jingfen<sup>1,2</sup>

Li, Guohong<sup>1,2</sup>

Lou, Weiqun, Vivian<sup>4,5</sup>

Chen, Jieling<sup>4,5</sup>

Affiliation:

1. School of Public Health, Shanghai Jiao Tong University
2. Center for Health Technology Assessment, Shanghai Jiao Tong University China Hospital Development Institute
3. Department of Oncology, Shanghai Chest Hospital, Shanghai Jiao Tong University
4. Department of Social Work & Social Administration, The University of Hong Kong
5. Sau Po Centre on Ageing, The University of Hong Kong

Corresponding author: Chen Jieling, Elaine, Department of Social Work & Social Administration, The University of Hong Kong, Pokfulam Road, Hong Kong, elaine09@connect.hku.hk; Lou, Weiqun, Vivian, PhD, Department of Social Work & Social Administration, Sau Po Centre on Ageing, The University of Hong Kong, Pokfulam Road, Hong Kong, (+852)39174835, wlou@hku.hk.



## COPING, MOOD AND HRQOL IN LUNG CANCER PATIENTS

## Abstract

**Objectives:** The ways patients cope with advanced cancer can influence their health-related quality of life (HRQoL). This study aims to examine the mediating role of positive and negative mood in the relationship between coping and HRQoL in patients with advanced lung cancer.

**Methods:** A consecutive sample of 261 patients (mean age: 59.99±9.53) diagnosed with stage III or IV lung cancer was recruited from the inpatient unit in a hospital that specializes in chest-related disease in Shanghai, China. Participants completed measurements including Medical Coping Modes Questionnaire, Positive and Negative Affect Schedule, and 5-level EuroQol 5-dimension instrument.

**Results:** Although the total effects of confrontation on HRQoL were not significant, competing indirect effects via mood were identified: (1) Positive indirect effects through positive mood were found for confrontation on mobility, usual activities, pain/discomfort, and overall utility index (indirect effect = 0.01, 95% CI 0.003 to 0.03); (2) Negative indirect effects through negative mood were found for confrontation on mobility, pain/discomfort, anxiety/depression, and overall utility index (indirect effect = -0.01, 95% CI -0.03 to -0.001 ). Resigned acceptance was negatively associated with HRQoL, and indirect effects via mood were identified: (1) Negative indirect effects through positive mood were found for resigned acceptance on mobility, self-care, usual activities, pain/discomfort, and overall utility index (indirect effect = -0.01, 95% CI -0.03 to -0.003); (2) Negative indirect effects through negative mood were found for resigned acceptance on domains of HRQoL and overall utility index (indirect effect = -0.04, 95% CI -0.06 to -0.02).

**Conclusions:** Confronting advanced lung cancer can fuel ambivalent emotional experiences. Nevertheless, accepting the illness in a resigned way can be maladaptive for health outcomes.

## COPING, MOOD AND HRQOL IN LUNG CANCER PATIENTS

The findings suggest interventions that facilitate adaptive coping, reduce negative mood, and enhance positive mood, as this could help to improve or maintain HRQoL in patients with advanced lung cancer.

**Keywords:** coping; quality of life; mood; lung cancer

#### Strengths and limitations of this study

- The study addressed health-related quality of life (HRQoL), an important health outcome of treatment for advanced lung cancer, and examined the psychological factors associated with HRQoL.
- The study examined the mediating role of positive and negative mood in the relationship between coping and a range of health outcomes (mobility, self-care, usual activities, pain/discomfort, anxiety/depression, overall HRQoL), which identifies the potential pathways between coping and HRQoL in patients with advanced lung cancer.
- Consecutive sampling could compromise the generalizability of the findings.
- Cross-sectional design.

## 1. Introduction

## COPING, MOOD AND HRQOL IN LUNG CANCER PATIENTS

1  
2  
3 During the past decade, lung cancer has become the most common incident cancer  
4 and the leading cause of cancer mortality in China and many other countries [1, 2]. Lung  
5 cancer survival rates are poor, with a five-year survival rate in China of 16.1% [3]. As  
6 curative treatments are limited for advanced lung cancer, improving or maintaining quality of  
7 life is the main focus of treatment. The prognostic value of health-related quality of life  
8 (HRQoL) in patients with lung cancer is supported by a range of studies [4, 5].  
9  
10  
11  
12  
13  
14  
15

16 The diagnosis of lung cancer can result in enormous stress for patients and their  
17 families, such as symptom burden [6], decisions about treatment options [7], and financial  
18 concerns [8]. The quality of life is significantly affected in patients with an advanced lung  
19 cancer [9]. Previous research has investigated socio-demographic, clinical, and psychosocial  
20 correlates of HRQoL in cancer patients [10]. Common risk factors identified from previous  
21 studies included older age, being female, financial burden, and advanced stage [11].  
22 Specifically, the manner in which patients cope with the life-threatening illness is indicated to  
23 contribute to mood and HRQoL in patients with advanced cancer [12, 13]. Two coping  
24 strategies, confrontation and acceptance, have received considerable attention in patients with  
25 a life-threatening illness [14-17].  
26  
27  
28  
29  
30  
31  
32  
33  
34  
35  
36  
37

38 Confrontation is a form of active coping that involves seeking information from  
39 various sources, asking for advice, and cognitive redefinition [14]. Some studies indicated  
40 that confrontation was adaptive for cancer patients, which was associated with lower negative  
41 mood [18-20], and better quality of life [16, 17]. However, other studies found insignificant  
42 associations between confrontation and health outcomes among cancer patients [15, 21, 22].  
43 For instance, Nipp et al. [15] studied 350 patients with incurable lung or gastrointestinal  
44 cancer, and found that using active coping was not associated with psychological distress or  
45 quality of life. It is suggested that confrontation could direct one's attention to the disease and  
46 its side effects, making it less effective in coping with cancer [14, 17].  
47  
48  
49  
50  
51  
52  
53  
54  
55  
56  
57

## COPING, MOOD AND HRQOL IN LUNG CANCER PATIENTS

1  
2  
3 Acceptance is regarded as a strategy to cope with unchangeable or uncontrollable  
4 negative events [23]. Resigned acceptance is a form of passive acceptance, in which  
5 individuals accept the stressful situation without endeavors to alter it [23, 24]. It is different  
6 from the concept of acceptance in Acceptance and Commitment Therapy, which is a form of  
7 active acceptance and characterized by active embracing of thoughts and feelings without  
8 unnecessary attempts to alter them [25]. Research shows that resigned acceptance could be  
9 maladaptive, which was associated with less favorable outcomes, such as negative mood and  
10 lower quality of life, in cancer patients and survivors [21, 26, 27].  
11  
12  
13  
14  
15  
16  
17  
18  
19  
20

21 Confrontation and resigned acceptance may be associated with cultural views of  
22 illness in the Chinese cancer population. Confucianism and Taoism are two dominant  
23 philosophical tenets in Chinese culture [28]. Confucian beliefs emphasize the importance of  
24 life, and death is a taboo and perceived as a negative event [29]. Consistent with this, the  
25 majority of patients and their families in China would choose to continue curative treatments  
26 to sustain and prolong life until the end of life [30]. On the other hand, cancer and other  
27 illness are believed to be an act of Ming (also known as fate) in the Taoist belief system [28].  
28 The fatalistic attitude toward cancer may lead to resigned acceptance, which may affect  
29 health outcomes during the illness trajectory [28].  
30  
31  
32  
33  
34  
35  
36  
37  
38  
39  
40

41 Although research shows that coping is associated with HRQoL in cancer patients, the  
42 mechanism of the link between coping and HRQoL remains largely unexamined in cancer  
43 patients. Preliminary exploration suggests that mood may be a potential pathway between  
44 coping and health outcomes [31-35]. Folkman and Greer developed a model of stress and  
45 coping for serious illness, and Roberts et al. revised the model based on studies among  
46 patients with advanced cancer [36, 37]. The models highlight the association between coping  
47 and emotional outcomes in the face of cancer, as the way patients cope with the stressors can  
48 influence the emotional outcomes, leading to positive and/or negative emotion [36, 37]. On  
49  
50  
51  
52  
53  
54  
55  
56  
57  
58  
59  
60

## COPING, MOOD AND HRQOL IN LUNG CANCER PATIENTS

1  
2  
3 the other hand, studies indicate that mood is linked to health outcomes (e.g., HRQoL) in  
4  
5 cancer patients and survivors [27, 38, 39]. Negative and positive mood involves different  
6  
7 physiological responses (e.g., nervous, endocrine, and immune system functioning), which  
8  
9 can influence overall physical health [40, 41]. Additionally, the broaden-and-build theory of  
10  
11 positive mood indicates that positive mood can broaden one's attention scope and thought-  
12  
13 action repertoires, which could be beneficial for physical health. In contrast, negative mood  
14  
15 can fuel a narrowed, socially isolating thought-action tendencies, which could result in poor  
16  
17 health outcomes [42, 43]. Given that coping strategies are related to mood, and that mood is  
18  
19 related to HRQoL, it is possible that mood may be a mediational pathway between coping  
20  
21 and HRQoL. In a prospective study among HIV caregivers, higher social coping predicted an  
22  
23 increase in positive affect, which decreased levels of physical symptoms, whereas higher  
24  
25 cognitive avoidance predicted enhanced negative affect, which resulted in higher levels of  
26  
27 physical symptoms [33]. However, in the context of advanced cancer, to our knowledge, no  
28  
29 study has examined the pathways between coping and HRQoL through mood. Since patients  
30  
31 with advanced cancer can encounter numerous stresses, understanding the effect of coping on  
32  
33 health and identifying the pathways through which patients maintain health and quality of life  
34  
35 can provide important insights for clinical practice and interventions.  
36  
37  
38  
39

40 In summary, the current study addresses the relationships between coping, mood, and  
41  
42 HRQoL among patients with advanced lung cancer. Specifically, we examined the effect of  
43  
44 confrontation and resigned acceptance coping on positive mood, negative mood, and HRQoL.  
45  
46 We also tested the mediating role of positive and negative mood in the relationship between  
47  
48 coping and HRQoL among Chinese patients with advanced lung cancer.  
49  
50  
51  
52  
53

## 54 2. Method

## 2.1 Participants and Public Involvement

Participants were recruited from the inpatient unit of the department of chest-oncology medicine at a public hospital that specializes in chest-related disease in Shanghai, China. The hospital is well recognized for its expertise, resources, and treatments for chest-related disease. A large number of patients with lung cancer in east China come to this hospital and receive treatment there. Patients were eligible in the study if they (a) were 18 years or older, (b) had been diagnosed with lung cancer, (c) had an expected survival time > 3 months, (d) had no significant cognitive impairment, and (e) were able to communicate with interviewers. Studies show that cancer patients may experience a steep decline in HRQoL during the last 3 months of life [44]. Therefore, we purposefully included only those with an expected survival time of at least 3 months. Those who could not understand the questions were excluded from the sample. Between June 2016 and July 2016, 328 patients met the inclusion criteria and were enrolled in the study.

Data collection was conducted by trained undergraduate students majoring in medicine and public health. Doctors and nurses in the inpatient unit of the department of chest-oncology medicine screened the eligible patients based on the inclusion and exclusion criteria, and researchers approached them and introduced the study. Those who agreed to participate in the study provided informed consent. Face-to-face interviews were then conducted. Disease and treatment information was extracted from medical records. The study was approved by the Ethics Committee of Shanghai Chest Hospital, Shanghai Jiao Tong University (No. KS1353). In accordance with our study aim, we focused on 267 patients with advanced-stage lung cancer (stage III or IV), and the 261 participants who provided full information on the main study variables (coping, mood, and HRQoL) were included in the data analysis. A flow chart of the sample selection procedure is presented in supplementary Figure 1.

## 2.2 Measures

**2.2.1 Health-related quality of life.** The 5-level EuroQol 5-dimension (EQ-5D-5L) was used to measure HRQoL in this study [45]. It contained five questions to assess five health dimensions, as experienced in the recent days, namely mobility, self-care, usual activities, pain/discomfort, and anxiety/depression. Respondents rated the severity on 5 levels ranging from 1 (*no*) to 5 (*very severe*). In the current study, EQ-5D-5L domain scores and overall utility index were calculated. Domain scores were recoded reversely based on the original levels of each domain, with higher scores indicating better quality in the domain. EQ-5D-5L utility index was calculated based on value sets developed by the EuroQol Group. To our knowledge, no value sets have been developed in a Chinese representative sample for the calculation of utility index, so in this study, utility index was calculated based on value sets weighted from a representative sample of the English general population [46]. The EQ-5D-5L utility index ranged from -1 to 1, with 1 representing full health, 0 representing a state of death, and negative values representing a state worse than death.

**2.2.2 Coping.** Two subscales of the Chinese version of the Medical Coping Modes Questionnaire (MCMQ) were used to measure confrontation and resigned acceptance coping strategies for lung cancer. MCMQ was developed by Feifel, Strack, and Nagy [14] among patients with a variety of life-threatening and chronic illnesses, and it is widely used for assessing coping strategies in patients in China [17, 47]. In the original questionnaire, acceptance-resignation had five items, and confrontation had eight items [14]. Sample items in acceptance-resignation subscale were as follows: “there is nothing you can do about your illness” and “you don’t care what happens to you.” One item in the confrontation subscale assessed how often participants “obtained information through books, magazines, and newspapers in the past several months”. In addition to that, we added one item assessing how often participants “obtained information through the Internet and new media in the past

## COPING, MOOD AND HRQOL IN LUNG CANCER PATIENTS

1  
2  
3 several months,” as the Internet and new media have become important sources of  
4  
5 information that supplement books, magazines, and newspaper. All the items were rated on a  
6  
7 4-point Likert scale ranging from 1 (*never*) to 4 (*very often*). The mean score of each coping  
8  
9 strategy was calculated, with a higher score indicating a higher probability of using that  
10  
11 particular coping strategy. The Cronbach’s  $\alpha$  coefficients of confrontation and resigned  
12  
13 acceptance in this study were 0.72 and 0.71, respectively.  
14  
15

16  
17 **2.2.3 Mood.** Mood was measured using the Positive and Negative Affect Schedule  
18  
19 (PANAS) [48]. The PANAS contained items to describe 10 positive affects (e.g., inspired,  
20  
21 excited, determined) and 10 negative affects (e.g., afraid, upset, distressed). Respondents  
22  
23 rated their experiences of each affect during the past two weeks on a 5-point Likert scale  
24  
25 ranging from 1 (*very slightly*) to 5 (*extremely*). The mean scores of items on the two  
26  
27 subscales were calculated for positive mood and negative mood, respectively. In the current  
28  
29 study, the Cronbach’s  $\alpha$  coefficients of negative mood and positive mood were 0.91 and 0.86,  
30  
31 respectively.  
32  
33

34  
35 **2.2.4 Covariates.** Sociodemographic factors included age, gender, education  
36  
37 (elementary school or lower, middle school, high school, college or higher), and marital  
38  
39 status (married, single, divorced, widowed). Perceived cancer-related financial burden was  
40  
41 assessed by the question, “Have your disease and treatment caused you and your family  
42  
43 financial difficulty?” and participants answered on a 5-point scale ranging from 0 (*No*) to 4  
44  
45 (*Very much*). Clinical factors included time of diagnosis, cancer stage, lung cancer type  
46  
47 (adenocarcinoma, squamous, poorly differentiated, small cell, not otherwise specified), and  
48  
49 treatment history (surgery, chemotherapy, radiotherapy, targeted therapy).  
50  
51

## 52 **2.3 Data Analysis**

53  
54  
55  
56  
57  
58  
59  
60



## COPING, MOOD AND HRQOL IN LUNG CANCER PATIENTS

1  
2  
3 First, descriptive statistics were presented for sociodemographic and clinical  
4 characteristics, and main study variables. Mean and standard deviation, or frequency and  
5 percentage, were computed for continuous and categorical variables, respectively.  
6  
7

8  
9 Independent *t* test, analysis of variance, and post-hoc comparison were conducted to analyze  
10 the effect of sociodemographic and clinical factors on positive mood, negative mood, and  
11 HRQoL (see supplementary Table 1). Correlational analyses were performed to examine the  
12 associations between the continuous variables.  
13  
14  
15  
16

17  
18 Secondly, multivariate, hierarchical, linear regression analyses were employed to  
19 examine the relationships among coping, mood, and HRQoL. The hierarchical regressions  
20 with HRQoL (domain scores and EQ-5D utility index) as a dependent variable involved three  
21 steps: In step one, gender, age, cancer stage, and covariates that were significantly correlated  
22 with mood and HRQoL (i.e., financial burden, lung cancer type, a history of radiotherapy)  
23 were entered; In step two, confrontation and resigned acceptance were entered; In step three,  
24 positive and negative mood were entered.  
25  
26  
27  
28  
29  
30  
31  
32  
33

34 Thirdly, the mediating effects of positive and negative mood in the relationship  
35 between coping and HRQoL were tested using the *MEDIATE* macro for SPSS developed by  
36 Preacher and Hayes [49]. Bootstrapping techniques using 5000 samples were used for the  
37 analysis, which was regarded as providing a more reliable estimate for the small sample size.  
38 Significant indirect effect was indicated by a 95% confidence interval of indirect effect  
39 without including zero. Power analyses indicated that in a model with two parallel mediators,  
40 a sample of 260 has 80% power to detect a 95% confidence interval of indirect effect,  
41 assuming correlations of  $r = 0.20$  between independent variable, the dependent variable, and  
42 the mediators. Schoemann, Boulton, and Short suggest that this power analytic method is an  
43 appropriate approach for determining power and sample size in mediation models [50]. All  
44 tests were two tailed, and a *p*-value of  $<0.05$  was considered statistically significant.  
45  
46  
47  
48  
49  
50  
51  
52  
53  
54  
55  
56  
57  
58  
59  
60

### 3. Results

#### 3.1 Sociodemographic and Clinical Characteristics

The sociodemographic and clinical characteristics for the samples are shown in Table 1. A total sample of 261 participants had a mean age of 59.99 years ( $SD = 9.53$ ). Males represented 70.1% of the samples. Most participants were married (94.6%) and perceived a slight to very severe cancer-related financial burden (85.8%). More than half of the participants had been diagnosed in the past 6 months (55.2%). More than 90% of the participants had ever received chemotherapy (96.6%), whereas a certain proportion had ever received surgery (23.4%), radiotherapy (23.4%), or targeted therapy (14.6%).

## COPING, MOOD AND HRQOL IN LUNG CANCER PATIENTS

Table 1 Sample Characteristics

| <b>Variables</b>                                 | <b>M(SD) / n (%)</b> |
|--------------------------------------------------|----------------------|
| <b>Age (years)</b>                               | 59.99 (9.53)         |
| <b>Gender</b>                                    |                      |
| Male                                             | 183 (70.1%)          |
| Female                                           | 78 (29.9%)           |
| <b>Education</b>                                 |                      |
| Elementary school or lower                       | 55 (21.1%)           |
| Middle school                                    | 91 (34.9%)           |
| High school                                      | 66 (25.3%)           |
| College or higher                                | 49 (18.8%)           |
| <b>Marital status</b>                            |                      |
| Married                                          | 247 (94.6%)          |
| Single/divorced/ widowed                         | 14 (5.4%)            |
| <b>Perceived cancer-related financial burden</b> |                      |
| None                                             | 37 (14.2%)           |
| Slight                                           | 100 (38.3%)          |
| Moderate                                         | 63 (24.1%)           |
| Severe                                           | 36 (13.8%)           |
| Very Severe                                      | 25 (9.6%)            |
| <b>Time since diagnosis <sup>a</sup></b>         |                      |
| Less than 6 months                               | 144 (55.2%)          |
| 6-12months                                       | 32 (12.3%)           |
| 12-24 months                                     | 31 (11.9%)           |
| More than 24 months                              | 46 (17.6%)           |
| <b>Stage</b>                                     |                      |
| III                                              | 82 (31.4%)           |
| IV                                               | 179 (68.6%)          |
| <b>Lung cancer type <sup>b</sup></b>             |                      |
| NSC - Adenocarcinoma                             | 140 (53.6%)          |
| NSC - Squamous                                   | 47 (18.0%)           |

## COPING, MOOD AND HRQOL IN LUNG CANCER PATIENTS

|                             |             |
|-----------------------------|-------------|
| NSC - Poorly differentiated | 24 (9.2%)   |
| NSC - Others                | 7 (2.7%)    |
| Small cell                  | 43 (16.5%)  |
| <b>Treatment history</b>    |             |
| Received surgery            |             |
| Yes                         | 61 (23.4%)  |
| No                          | 200 (76.6%) |
| Received chemotherapy       |             |
| Yes                         | 252 (96.6%) |
| No                          | 9 (3.4%)    |
| Received radiotherapy       |             |
| Yes                         | 61 (23.4%)  |
| No                          | 200 (76.6%) |
| Received targeted therapy   |             |
| Yes                         | 38 (14.6%)  |
| No                          | 223 (85.4%) |

*Note.* a. For time since diagnosis, the sum of number is not 261 due to missing data; b. NSC:

Non-small cell.

### 3.2 Coping, Mood, and HRQoL

Pearson correlation analysis was performed to examine the relationships between coping, mood, and HRQoL (see Table 2). A small and positive correlation was observed between confrontation coping and positive mood ( $r = 0.21$ ). Resigned acceptance was moderately and positively correlated with negative mood ( $r = 0.46$ ), but moderately and inversely correlated with positive mood ( $r = -0.27$ ). Use of resigned acceptance was correlated with more difficulties in mobility ( $r = -0.21$ ), self-care ( $r = -0.19$ ), usual activities ( $r = -0.19$ ), pain/discomfort ( $r = -0.19$ ), anxiety/depression ( $r = -0.41$ ), and lower EQ-5D utility index ( $r = -0.28$ ).

## COPING, MOOD AND HRQOL IN LUNG CANCER PATIENTS

Table 2 Correlation among coping, affect and HRQOL

|                                | M (SD)      | 1      | 2       | 3      | 4       | 5      | 6      | 7      | 8      | 9      |
|--------------------------------|-------------|--------|---------|--------|---------|--------|--------|--------|--------|--------|
| <b>1. Confrontation</b>        | 2.37 (0.49) | 1      |         |        |         |        |        |        |        |        |
| <b>2. Resigned acceptance</b>  | 1.92 (0.62) | -0.03  | 1       |        |         |        |        |        |        |        |
| <b>3. Positive mood</b>        | 2.40 (0.76) | 0.21** | -0.27** | 1      |         |        |        |        |        |        |
| <b>4. Negative mood</b>        | 1.84 (0.76) | 0.11   | 0.46**  | -0.11  | 1       |        |        |        |        |        |
| <b>5. Mobility</b>             | 4.32 (0.99) | -0.05  | -0.21** | 0.19** | -0.28** | 1      |        |        |        |        |
| <b>6. Self-care</b>            | 4.58 (0.86) | -0.06  | -0.19** | 0.15*  | -0.28** | 0.78** | 1      |        |        |        |
| <b>7. Usual activities</b>     | 4.24 (0.97) | -0.10  | -0.19** | 0.16*  | -0.27** | 0.78** | 0.73** | 1      |        |        |
| <b>8. Pain/discomfort</b>      | 3.98 (0.87) | -0.08  | -0.19** | 0.14*  | -0.28** | 0.45** | 0.43** | 0.46** | 1      |        |
| <b>9. Anxiety/depression</b>   | 4.22 (0.73) | -0.03  | -0.41** | 0.19** | -0.50** | 0.21** | 0.21** | 0.25** | 0.27** | 1      |
| <b>10. EQ-5D utility index</b> | 0.80 (0.19) | -0.10  | -0.28** | 0.20** | -0.38** | 0.84** | 0.82** | 0.84** | 0.69** | 0.45** |

\* $p < 0.05$ , \*\* $p < 0.01$

*Scale range:* Confrontation, resigned acceptance: 1 (never) – 4 (very often); Positive mood, negative mood: 1 (very slightly) – 5 (extremely);

Mobility, self-care, usual activities, pain/discomfort, anxiety/depression: 1 (very severe) – 5 (no); EQ-5D utility index: -1 (worse than death) – 1 (full health)

## COPING, MOOD AND HRQOL IN LUNG CANCER PATIENTS

1  
2  
3 Hierarchical regression analyses were used to examine the relationship of  
4 confrontation and resigned acceptance coping with positive mood, negative mood, and  
5 HRQoL (see Table 3). Age, gender, cancer stage, and significant correlates of mood and/or  
6 HRQoL ( $p < 0.05$ ), including perceived cancer-related financial burden, a history of  
7 radiotherapy, and lung cancer type (poorly differentiated non-small cell, small cell, other  
8 non-small cell), were controlled in the hierarchical regression analyses. Regarding positive  
9 mood, in addition to covariates, confrontation and resigned acceptance were found to be  
10 significant factors, as confrontation was associated with higher positive mood ( $\beta = 0.19, p =$   
11  $0.002$ ), whereas resigned acceptance was associated with lower positive mood ( $\beta = -0.25, p <$   
12  $0.001$ ). Regarding negative mood, in addition to covariates, confrontation and resigned  
13 acceptance were significant factors, as use of confrontation ( $\beta = 0.11, p = 0.040$ ) and resigned  
14 acceptance ( $\beta = 0.44, p < 0.001$ ) were associated with higher negative mood.

15  
16  
17  
18  
19  
20  
21  
22  
23  
24  
25  
26  
27  
28  
29  
30 Regarding the EQ-5D domain scores, after controlling sociodemographic and clinical  
31 covariates, confrontation was not associated with the domain scores, whereas resigned  
32 acceptance was inversely associated with all domains. Positive mood was associated with less  
33 difficulty in mobility, usual activities, pain/discomfort, but not associated with self-care and  
34 anxiety/depression. Negative mood was negatively associated with more difficulty in all  
35 domains.

36  
37  
38  
39  
40  
41  
42  
43  
44 Regarding EQ-5D utility index, after controlling sociodemographic and clinical  
45 covariates, resigned acceptance was inversely associated with EQ-5D utility index ( $\beta = -0.22,$   
46  $p < 0.001$ ), whereas confrontation was not associated with EQ-5D utility index. Moreover,  
47 the effects of mood on EQ-5D utility index were significant, as positive mood was associated  
48 with higher EQ-5D utility index ( $\beta = 0.17, p = 0.005$ ), whereas negative mood was associated  
49 with lower EQ-5D utility index ( $\beta = -0.28, p < 0.001$ ).

## COPING, MOOD AND HRQOL IN LUNG CANCER PATIENTS

Table 3 Multiple regression results for predictors of mood and HRQOL

|                                                     | Positive mood |              | Negative mood |                  | Mobility  |              | Self-care |              | Usual activities |              | Pain / discomfort |              | Anxiety / depression |                  | EQ-5D utility index |              |
|-----------------------------------------------------|---------------|--------------|---------------|------------------|-----------|--------------|-----------|--------------|------------------|--------------|-------------------|--------------|----------------------|------------------|---------------------|--------------|
|                                                     | $\beta^f$     | <i>p</i>     | $\beta^f$     | <i>p</i>         | $\beta^f$ | <i>p</i>     | $\beta^f$ | <i>p</i>     | $\beta^f$        | <i>p</i>     | $\beta^f$         | <i>p</i>     | $\beta^f$            | <i>p</i>         | $\beta^f$           | <i>p</i>     |
| <b>Step 1</b>                                       |               |              |               |                  |           |              |           |              |                  |              |                   |              |                      |                  |                     |              |
| <b>Age</b>                                          | -0.15         | <b>0.021</b> | -0.04         | 0.53             | -0.13     | <b>0.040</b> | -0.13     | <b>0.046</b> | -0.06            | 0.31         | -0.07             | 0.25         | 0.01                 | 0.91             | -0.10               | 0.09         |
| <b>Gender<sup>a</sup></b>                           | -0.07         | 0.32         | 0.05          | 0.40             | -0.07     | 0.29         | -0.06     | 0.35         | -0.09            | 0.15         | -0.01             | 0.85         | 0.02                 | 0.76             | -0.03               | 0.68         |
| <b>Financial burden<sup>b</sup></b>                 | -0.14         | <b>0.032</b> | 0.30          | <b>&lt;0.001</b> | -0.16     | <b>0.010</b> | -0.15     | <b>0.017</b> | -0.20            | <b>0.002</b> | -0.15             | <b>0.018</b> | -0.25                | <b>&lt;0.001</b> | -0.22               | <b>0.001</b> |
| <b>Cancer stage<sup>c</sup></b>                     | -0.09         | 0.16         | -0.07         | 0.22             | 0.00      | 0.99         | 0.05      | 0.46         | 0.03             | 0.67         | 0.04              | 0.58         | 0.04                 | 0.51             | 0.04                | 0.53         |
| <b>Cancer type-other non-small cell (Reference)</b> | 0             |              | 0             |                  | 0         |              | 0         |              | 0                |              | 0                 |              | 0                    |                  | 0                   |              |
| <b>Cancer type-undifferentiated<sup>d</sup></b>     | 0.01          | 0.93         | -0.03         | 0.58             | -0.07     | 0.26         | -0.08     | 0.19         | -0.12            | 0.053        | -0.08             | 0.19         | -0.04                | 0.51             | -0.14               | <b>0.027</b> |
| <b>Cancer type-small cell<sup>d</sup></b>           | -0.08         | 0.21         | -0.01         | 0.85             | 0.05      | 0.44         | 0.03      | 0.66         | 0.08             | 0.22         | 0.14              | <b>0.025</b> | 0.07                 | 0.29             | 0.10                | 0.12         |
| <b>Received radiotherapy<sup>e</sup></b>            | -0.03         | 0.63         | 0.16          | <b>0.009</b>     | -0.17     | <b>0.006</b> | -0.19     | <b>0.003</b> | -0.14            | <b>0.026</b> | -0.20             | <b>0.002</b> | -0.07                | 0.24             | -0.20               | <b>0.001</b> |
| <b><math>\Delta R^2</math></b>                      | 0.054         |              | 0.141         |                  | 0.079     |              | 0.081     |              | 0.097            |              | 0.094             |              | 0.080                |                  | 0.124               |              |
| <b>Step 2</b>                                       |               |              |               |                  |           |              |           |              |                  |              |                   |              |                      |                  |                     |              |



1  
2  
3  
4  
5  
6  
7  
8  
9  
10  
11  
12  
13  
14  
15  
16  
17  
18  
19  
20  
21  
22  
23  
24  
25  
26  
27  
28  
29  
30  
31  
32  
33  
34  
35  
36  
37  
38  
39  
40  
41  
42  
43  
44  
45  
46  
47

COPING, MOOD AND HRQOL IN LUNG CANCER PATIENTS

|                               |       |                  |       |                  |       |              |       |              |       |              |       |              |       |                  |       |                  |
|-------------------------------|-------|------------------|-------|------------------|-------|--------------|-------|--------------|-------|--------------|-------|--------------|-------|------------------|-------|------------------|
| <b>Confrontation</b>          | 0.19  | <b>0.002</b>     | 0.11  | <b>0.040</b>     | -0.05 | 0.40         | -0.05 | 0.39         | -0.07 | 0.25         | -0.07 | 0.29         | -0.01 | 0.81             | -0.08 | 0.17             |
| <b>Resigned acceptance</b>    | -0.25 | <b>&lt;0.001</b> | 0.44  | <b>&lt;0.001</b> | -0.16 | <b>0.013</b> | -0.15 | <b>0.019</b> | -0.16 | <b>0.012</b> | -0.14 | <b>0.029</b> | -0.41 | <b>&lt;0.001</b> | -0.22 | <b>&lt;0.001</b> |
| <b>ΔR<sup>2</sup></b>         | 0.098 |                  | 0.191 |                  | 0.025 |              | 0.023 |              | 0.027 |              | 0.021 |              | 0.155 |                  | 0.053 |                  |
| <b>Step 3</b>                 |       |                  |       |                  |       |              |       |              |       |              |       |              |       |                  |       |                  |
| <b>Positive mood</b>          |       |                  |       |                  | 0.16  | <b>0.013</b> | 0.12  | 0.078        | 0.14  | <b>0.026</b> | 0.14  | <b>0.029</b> | 0.10  | 0.076            | 0.17  | <b>0.005</b>     |
| <b>Negative mood</b>          |       |                  |       |                  | -0.22 | <b>0.003</b> | -0.20 | <b>0.006</b> | -0.17 | <b>0.020</b> | -0.20 | <b>0.005</b> | -0.36 | <b>&lt;0.001</b> | -0.28 | <b>&lt;0.001</b> |
| <b>ΔR<sup>2</sup></b>         |       |                  |       |                  | 0.053 |              | 0.039 |              | 0.036 |              | 0.044 |              | 0.093 |                  | 0.076 |                  |
| <b>Adjusted R<sup>2</sup></b> | 0.120 |                  | 0.307 |                  | 0.118 |              | 0.103 |              | 0.122 |              | 0.121 |              | 0.298 |                  | 0.218 |                  |

Note. a. 0=Male, 1=Female; b. range:1 (no difficulty) – 5 (very much); c. 1=stage III, 2=stage IV; d. other non-small cell lung cancers was the reference group; e. 0=No, 1=Yes; f. standardized coefficients

### 3.3 Mediating Effect of Mood on the Association between Coping and HRQoL

The MEDIANTE macro was used to examine the mediating effect of mood in the relationship between coping and HRQoL, controlling for age, gender, cancer stage, perceived cancer-related financial burden, history of radiotherapy, and lung cancer type (poorly differentiated non-small cell, small cell, other non-small cell). The indirect effect (ab) was estimated as the product of regression coefficients predicting mood from each coping strategy (a), and HRQoL from mood (b) (see Figure 1). Bootstrapping techniques using 5000 samples revealed significant indirect effects for confrontation and resigned acceptance on HRQoL through positive and negative mood, respectively. The results are presented in Table 4.

Although the total effects of confrontation on EQ-5D domains scores and utility index were not significant, competing indirect effects via mood were identified. On one hand, positive indirect effects were found for confrontation on mobility (point estimate = 0.06,  $SE = 0.03$ , 95% CI [0.01, 0.13]), usual activities (point estimate = 0.05,  $SE = 0.03$ , 95% CI [0.01, 0.12]), pain/discomfort (point estimate = 0.05,  $SE = 0.03$ , 95% CI [0.004, 0.11]), and overall utility index (point estimate = 0.01,  $SE = 0.01$ , 95% CI [0.003, 0.03]) through positive mood. On the other hand, negative indirect effects were found for confrontation on mobility (point estimate = -0.05,  $SE = 0.03$ , 95% CI [-0.12, -0.002]), pain/discomfort (point estimate = -0.04,  $SE = 0.02$ , 95% CI [-0.10, -0.001]), anxiety/depression (point estimate = -0.06,  $SE = 0.03$ , 95% CI [-0.13, -0.003]), and overall utility index (point estimate = -0.01,  $SE = 0.01$ , 95% CI [-0.03, -0.001]) through negative mood. The direct effects of confrontation on EQ-5D domains scores and utility index were not significant.

Resigned acceptance has a significant negative total effect on EQ-5D domains scores and utility index. Furthermore, indirect effects of resigned acceptance on HRQoL via positive and negative mood were identified. Use of resigned acceptance was associated with decrease

## COPING, MOOD AND HRQOL IN LUNG CANCER PATIENTS

1  
2  
3 in positive mood, and increase in negative mood, which could lead to more difficulty in  
4  
5 mobility, self-care, usual activities, pain/discomfort, anxiety/depression, and overall utility  
6  
7 index (indirect effect via positive mood: point estimate = -0.01, *SE* = 0.01, 95% CI [-0.03, -  
8  
9 0.003]; indirect effect via negative mood: point estimate = -0.04, *SE* = 0.01, 95% CI [-0.06, -  
10  
11 0.02]).  
12  
13  
14  
15  
16  
17  
18  
19  
20  
21  
22  
23  
24  
25  
26  
27  
28  
29  
30  
31  
32  
33  
34  
35  
36  
37  
38  
39  
40  
41  
42  
43  
44  
45  
46  
47  
48  
49  
50  
51  
52  
53  
54  
55  
56  
57  
58  
59  
60

For peer review only

COPING, MOOD AND HRQOL IN LUNG CANCER PATIENTS

Table 4 Mediation model testing the direct and indirect effect of coping on HRQOL via mood

| Outcome                 | Predictor           | Mediator      | Path a          | Path b          | Path ab: indirect effect of coping on HRQOL |                 | Path c': Direct effect of coping on HRQOL | Path c: Total effect of coping on HRQOL |
|-------------------------|---------------------|---------------|-----------------|-----------------|---------------------------------------------|-----------------|-------------------------------------------|-----------------------------------------|
|                         |                     |               | coef (se)       | coef (se)       | coef (se)                                   | 95% CI          | coef (se)                                 | coef (se)                               |
| <b>HRQOL</b>            | Confrontation       | Positive mood | 0.30** (0.09)   | 0.04** (0.01)   | 0.01 (0.01)                                 | [0.003, 0.03]   | -0.03 (0.02)                              | -0.03 (0.02)                            |
|                         |                     | Negative mood | 0.17* (0.08)    | -0.07*** (0.02) | -0.01 (0.01)                                | [-0.03, -0.001] |                                           |                                         |
|                         | Resigned acceptance | Positive mood | -0.31*** (0.08) |                 | -0.01 (0.01)                                | [-0.03, -0.003] | -0.02 (0.02)                              | -0.07*** (0.02)                         |
|                         |                     | Negative mood | 0.54*** (0.07)  |                 | -0.04 (0.01)                                | [-0.06, -0.02]  |                                           |                                         |
| <b>Mobility</b>         | Confrontation       | Positive mood | 0.30** (0.09)   | 0.21* (0.08)    | 0.06 (0.03)                                 | [0.01, 0.13]    | -0.12 (0.13)                              | -0.10 (0.12)                            |
|                         |                     | Negative mood | 0.17* (0.08)    | -0.28** (0.09)  | -0.05 (0.03)                                | [-0.12, -0.002] |                                           |                                         |
|                         | Resigned acceptance | Positive mood | -0.31*** (0.08) |                 | -0.06 (0.03)                                | [-0.13, -0.01]  | -0.03 (0.11)                              | -0.25* (0.10)                           |
|                         |                     | Negative mood | 0.54*** (0.07)  |                 | -0.15 (0.06)                                | [-0.27, -0.05]  |                                           |                                         |
| <b>Self-care</b>        | Confrontation       | Positive mood | 0.30** (0.09)   | 0.13 (0.07)     | 0.04 (0.03)                                 | [-0.003, 0.10]  | -0.09 (0.11)                              | -0.09 (0.11)                            |
|                         |                     | Negative mood | 0.17* (0.08)    | -0.23** (0.08)  | -0.04 (0.03)                                | [-0.10, 0.002]  |                                           |                                         |
|                         | Resigned acceptance | Positive mood | -0.31*** (0.08) |                 | -0.04 (0.03)                                | [-0.10, -0.003] | -0.04 (0.10)                              | -0.21* (0.09)                           |
|                         |                     | Negative mood | 0.54*** (0.07)  |                 | -0.14 (0.05)                                | [-0.24, -0.05]  |                                           |                                         |
| <b>Usual Activities</b> | Confrontation       | Positive mood | 0.30** (0.09)   | 0.18* (0.08)    | 0.05 (0.03)                                 | [0.01, 0.12]    | -0.16 (0.12)                              | -0.14 (0.12)                            |
|                         |                     | Negative mood | 0.17* (0.08)    | -0.22* (0.09)   | -0.04 (0.02)                                | [-0.09, 0.001]  |                                           |                                         |
|                         | Resigned acceptance | Positive mood | -0.31*** (0.08) |                 | -0.06 (0.03)                                | [-0.12, -0.01]  | -0.07 (0.11)                              | -0.25* (0.10)                           |
|                         |                     | Negative mood | 0.54*** (0.07)  |                 | -0.12 (0.05)                                | [-0.22, -0.02]  |                                           |                                         |

1  
2  
3  
4  
5  
6  
7  
8  
9  
10  
11  
12  
13  
14  
15  
16  
17  
18  
19  
20  
21  
22  
23  
24  
25  
26  
27  
28  
29  
30  
31  
32  
33  
34  
35  
36  
37  
38  
39  
40  
41  
42  
43  
44  
45  
46  
47

COPING, MOOD AND HRQOL IN LUNG CANCER PATIENTS

|                             |                     |                 |                 |                 |                |                 |                 |               |
|-----------------------------|---------------------|-----------------|-----------------|-----------------|----------------|-----------------|-----------------|---------------|
| <b>Pain / Discomfort</b>    | Confrontation       | Positive mood   | 0.30** (0.09)   | 0.16* (0.07)    | 0.05 (0.03)    | [0.004, 0.11]   | -0.12 (0.11)    | -0.12 (0.11)  |
|                             |                     | Negative mood   | 0.17* (0.08)    | -0.23** (0.08)  | -0.04 (0.02)   | [-0.10, -0.001] |                 |               |
| <b>Anxiety / Depression</b> | Resigned acceptance | Positive mood   | -0.31*** (0.08) |                 | -0.05 (0.03)   | [-0.11, -0.005] | -0.02 (0.10)    | -0.19* (0.09) |
|                             |                     | Negative mood   | 0.54*** (0.07)  |                 | -0.13 (0.05)   | [-0.23, -0.04]  |                 |               |
|                             | Confrontation       | Positive mood   | 0.30** (0.09)   | 0.10 (0.05)     | 0.03 (0.02)    | [-0.003, 0.74]  | 0.01 (0.08)     | -0.02 (0.08)  |
|                             |                     | Negative mood   | 0.17* (0.08)    | -0.34*** (0.06) | -0.06 (0.03)   | [-0.13, -0.003] |                 |               |
| Resigned acceptance         | Positive mood       | -0.31*** (0.08) |                 | -0.03 (0.02)    | [-0.07, 0.003] | -0.26** (0.07)  | -0.48*** (0.07) |               |
|                             | Negative mood       | 0.54*** (0.07)  |                 | -0.18 (0.04)    | [-0.27, -0.11] |                 |                 |               |

Note. Age, gender, financial burden, disease stage, lung cancer type, and history of radiotherapy were controlled in the mediation model. All coefficients (a, b, c', c) were unstandardized coefficients. \* $p < 0.05$ , \*\* $p < 0.01$ , \*\*\* $p < 0.001$

#### 4. Discussion

To our knowledge, this is the first study to examine the relationship between coping, positive and negative mood, and HRQoL and the mediating role of mood in the relationship between coping and HRQoL among patients with advanced lung cancer. The findings of this study indicate that examining the pathway via positive and negative mood can generate a new understanding of the effect of coping on HRQoL among patients with advanced lung cancer, regardless of sociodemographic and clinical factors. The confrontation coping strategy was not directly associated with domains of HRQoL or overall HRQoL, but two significant indirect pathways via mood were identified. On one hand, confrontation had positive indirect effects on mobility, usual activities, pain, and overall HRQoL via positive mood; On the other hand, confrontation had negative indirect effects on mobility, pain, anxiety, and overall HRQoL via negative mood; Positive and negative indirect effect could counteract, resulting in a nonsignificant total effect. In contrast, use of resigned acceptance coping was associated with an increase in negative mood and a decrease in positive mood, which could in turn result in more difficulty in mobility, self-care, usual activities, pain, and poor overall HRQoL. On the whole, this is a unique finding that indicates the ambivalence of confrontation and the maladaptive nature of resigned acceptance among patients with advanced lung cancer.

The mean EQ-5D utility index in the current study was found to be 0.80, which was comparable to a study among patients with advanced non-small cell lung cancer in China with a utility index of 0.81 [51]. Consistent with previous studies, patients perceiving higher financial burden were more likely to report poor HRQoL compared to those perceiving lower financial burden related to cancer [11, 52]. Financial burden may restrict access to some drugs and treatment [52], and it may also lead to a sense of guilt for relying on families [29], which may affect health outcomes.

## COPING, MOOD AND HRQOL IN LUNG CANCER PATIENTS

1  
2  
3 The current findings support the theory of stress and coping in the context of  
4 advanced cancer by indicating that coping can play a role in adapting to the experience of  
5 lung cancer, which could in turn influence emotional and health outcomes [36, 37]. The  
6 current study is in line with previous studies indicating that resigned acceptance was  
7 associated with less favorable outcomes [21, 26]. Resigned acceptance is related to the  
8 fatalistic attitude toward illness in traditional Taoist beliefs [28]. Giving up control in the  
9 actual situation, or even other aspects of life and holding negative expectations about the  
10 future could reduce positive mood, such as hope and inspiration, and contribute to the  
11 emotional distress and poor health outcomes in patients with advanced cancer.  
12  
13  
14  
15  
16  
17  
18  
19  
20  
21  
22

23 Confrontation was found to be associated with increased positive and negative mood.  
24 In the current study, confrontation was characterized by attempts such as seeking information  
25 from various sources, asking for advice from family and clinicians, and conducting shared  
26 decision making. Through such efforts, patients may regain a sense of control and redirect  
27 energy to constructive actions during treatment and daily living, which might facilitate the  
28 occurrence of positive mood. However, it is also possible that individuals could encounter  
29 various stressful decisions and pieces of information when they actively confront the  
30 advanced disease, which might lead to negative mood.  
31  
32  
33  
34  
35  
36  
37  
38  
39  
40

41 Our findings are in line with other studies reporting a nonsignificant association  
42 between confrontation and HRQoL among cancer patients [15, 21, 22]. Particularly, the  
43 findings on the mediating role of mood can help clarify the mechanisms underlying the  
44 nonsignificant association. The coexisting positive and negative indirect effect via mood  
45 could counteract one another, resulting in a null, or weak, total effect of confrontation on  
46 HRQoL. The ambivalence of confrontation may also reflect the effect of fighting attitude  
47 towards life-threatening illness in Chinese population, in which the patients and their families  
48 would seek, try, and continue available curative treatments to sustain and prolong life. Even  
49  
50  
51  
52  
53  
54  
55  
56  
57  
58  
59  
60

## COPING, MOOD AND HRQOL IN LUNG CANCER PATIENTS

1  
2  
3 though actively confronting the advanced cancer may have some benefits (e.g., sense of  
4 control, constructive actions and skills), it may also remind patients of the potential incurable  
5 nature of advanced cancer and increase distress.  
6  
7  
8  
9

10 This study indicated that mood can be a pathway between coping and health  
11 outcomes. One explanation is related to physiology of mood [53], as positive and negative  
12 mood are associated with physiological levels in different directions, which can lead to  
13 different health outcomes. The second explanation is related to thought-action repertoires  
14 [43]. Negative mood is suggested to narrow the thought-action repertoires and increase  
15 unhealthy lifestyle and social isolation [43, 54], which could result in poor health outcomes.  
16 In contrast, positive affect is suggested to broaden the scope of attention and thought-action  
17 repertoires and build up personal and social resources [43], which could be beneficial to  
18 health outcomes. The third explanation is related to attributional interpretation [33]. HRQoL  
19 refers to a self-perceived health status, and it is possible that participants in a negative mood  
20 tend to perceive lower health status (more difficulties in daily living and symptoms) than  
21 those in a positive mood.  
22  
23  
24  
25  
26  
27  
28  
29  
30  
31  
32  
33  
34  
35

36 This study has some limitations. First, causality on the relationships between coping,  
37 mood, and HRQoL could not be drawn out from this cross-sectional study. Secondly,  
38 although Medical Coping Modes Questionnaire measured three coping strategies (i.e.,  
39 confrontation, acceptance-resignation, avoidance), reliability of avoidance, indicated by  
40 Cronbach'  $\alpha$  coefficient, was low in the current study. This restricted us from analyzing the  
41 effect of the avoidance strategy. Thirdly, although EuroQol 5-dimension was used to measure  
42 HRQoL among patients with advanced cancer in a range of studies [51, 55], the measurement  
43 properties of the instrument is needed to be examined further in patients with advanced  
44 cancer [56]. Fourthly, the sample was recruited from one hospital in China, which could  
45 compromise the generalizability of the findings.  
46  
47  
48  
49  
50  
51  
52  
53  
54  
55  
56  
57  
58  
59  
60



## COPING, MOOD AND HRQOL IN LUNG CANCER PATIENTS

1  
2  
3           Considering the effect of coping strategies, the findings of our study suggest specific  
4  
5 attention to resigned acceptance among patients with advanced cancer, which was associated  
6  
7 with negative mood and poor HRQoL. Despite patients accepting the reality of disease,  
8  
9 practitioners may help them to regain a sense of control and develop constructive and  
10  
11 meaningful responses. Acceptance-based interventions, such as Acceptance and Commitment  
12  
13 Therapy, may be a worthwhile approach, which are suggested to reduce emotional distress  
14  
15 and improve quality of life by facilitating the active acceptance of unpleasant thoughts and  
16  
17 feelings in cancer patients [57, 58]. Additionally, patients who actively confront the advanced  
18  
19 cancer may experience both positive and negative mood. We suggest that practitioners  
20  
21 consider this ambivalent emotional experience and relieve patients' distress in the face of the  
22  
23 life-threatening disease. Finally, when implementing interventions for the improvement of  
24  
25 HRQoL, we suggest that practitioners consider the role of both positive and negative mood,  
26  
27 which could serve as pathways between coping and HRQoL among patients with advanced  
28  
29 lung cancer. Early palliative care may be integrated into standard oncology care, which is  
30  
31 suggested to facilitate adaptive coping, reduce emotional distress, and improve quality of life  
32  
33 in patients with advanced cancer [59].  
34  
35  
36  
37

38 **Figure 1** Positive and negative mood as mediators of the association between coping and  
39  
40 HRQoL  
41  
42

### 43 **Acknowledgements**

44  
45 The authors thank all the participants for their involvement, and all healthcare workers for  
46  
47 their kind support in the study.  
48  
49

### 50 **Contributors**

## COPING, MOOD AND HRQOL IN LUNG CANCER PATIENTS

1  
2  
3 HY, JH, LV, CJ designed the study. HY, JH, YM, ZJ, and LG collected data. HY and CJ  
4 analyzed the data. HY and CJ drafted the manuscript. HY, JH, YM, ZJ, LG, LV, CJ revised  
5 the manuscript.  
6  
7  
8  
9

**Funding**

10  
11  
12 The study is supported by Shanghai Municipal Health Bureau Foundation (No. 201740116),  
13 School of Medicine of Shanghai Jiao Tong University Core Education Project (No.  
14 ZD150603), The Fourth Round of Three-year Action Plan on Public Health Discipline and  
15 Talent Program: Evidence-based Public Health and Health Economics (No.15GWZK0901)  
16  
17  
18  
19  
20  
21

**Competing interests**

22  
23  
24 The authors declare that they have no conflict of interest.  
25  
26

**Patient consent**

27  
28  
29  
30 Obtained.  
31  
32

**Data sharing statement**

33  
34  
35  
36 No additional data were available.  
37  
38

**References**

- 39  
40  
41  
42 1. Chen WQ, Zheng RS, Baade PD et al. Cancer Statistics in China, 2015. *Ca-a Cancer*  
43 *Journal for Clinicians* 2016; 66: 115-132.  
44 2. Stewart B, Wild CP. *World cancer report 2014*. Health 2017.  
45 3. Zeng HM, Zheng RS, Guo YM et al. Cancer survival in China, 2003-2005: A population-  
46 based study. *International Journal of Cancer* 2015; 136: 1921-1930.  
47 4. Gupta D, Braun DP, Staren ED. Association between changes in quality of life scores  
48 and survival in non-small cell lung cancer patients. *European Journal of Cancer Care* 2012;  
49 21: 614-622.  
50 5. Maione P, Perrone F, Gallo C et al. Pretreatment quality of life and functional status  
51 assessment significantly predict survival of elderly patients with advanced non-small-cell  
52 lung cancer receiving chemotherapy: A prognostic analysis of the Multicenter Italian Lung  
53 Cancer in the Elderly Study. *Journal of Clinical Oncology* 2005; 23: 6865-6872.  
54  
55  
56  
57  
58  
59  
60

## COPING, MOOD AND HRQOL IN LUNG CANCER PATIENTS

- 1
- 2
- 3 6. Ma YX, Yang YP, Huang Y et al. An investigation of symptom burden and quality of
- 4 life in Chinese chemo-naive advanced lung cancer patients by using the Instrument-Cloud
- 5 QOL System. *Lung Cancer* 2014; 84: 301-306.
- 6 7. Schmidt K, Damm K, Prenzler A et al. Preferences of lung cancer patients for
- 7 treatment and decision-making: a systematic literature review. *European Journal of Cancer*
- 8 *Care* 2016; 25: 580-591.
- 9 8. Huang H-Y, Shi J-F, Guo L-W et al. Expenditure and financial burden for common
- 10 cancers in China: a hospital-based multicentre cross-sectional study. *The Lancet* 2016; 388:
- 11 S10.
- 12 9. Chouaid C, Agulnik J, Goker E et al. Health-Related Quality of Life and Utility in
- 13 Patients with Advanced Non-Small-Cell Lung Cancer: A Prospective Cross-Sectional Patient
- 14 Survey in a Real-World Setting. *Journal of Thoracic Oncology* 2013; 8: 997-1003.
- 15 10. Polanski J, Jankowska-Polanska B, Rosinczuk J et al. Quality of life of patients with
- 16 lung cancer. *Oncotargets and Therapy* 2016; 9: 1023-1028.
- 17 11. Chen JE, Lou VW, Jian H et al. Objective and subjective financial burden and its
- 18 associations with health-related quality of life among lung cancer patients. *Supportive Care*
- 19 *in Cancer* 2018; 26: 1265-1272.
- 20 12. Mosher CE, Ott MA, Hanna N et al. Coping with physical and psychological symptoms:
- 21 a qualitative study of advanced lung cancer patients and their family caregivers. *Supportive*
- 22 *Care in Cancer* 2015; 23: 2053-2060.
- 23 13. Nipp RD, Greer JA, El-Jawahri A et al. Coping and Prognostic Awareness in Patients
- 24 With Advanced Cancer. *Journal of Clinical Oncology* 2017; 35: 2551-+.
- 25 14. Feifel H, Strack S, Nagy VT. Coping strategies and associated features of medically ill
- 26 patients. *Psychosomatic Medicine* 1987; 49: 616-625.
- 27 15. Nipp RD, El-Jawahri A, Fishbein JN et al. The relationship between coping strategies,
- 28 quality of life, and mood in patients with incurable cancer. *Cancer* 2016; 122: 2110-2116.
- 29 16. Ma YM, Ba CF, Wang YB. Analysis of factors affecting the life quality of the patients
- 30 with late stomach cancer. *Journal of Clinical Nursing* 2014; 23: 1257-1262.
- 31 17. Wu XD, Qin HY, Zhang JE et al. The prevalence and correlates of symptom distress
- 32 and quality of life in Chinese oesophageal cancer patients undergoing chemotherapy after
- 33 radical oesophagectomy. *European Journal of Oncology Nursing* 2015; 19: 502-508.
- 34 18. Hong JF, Wei ZZ, Wang WL. Preoperative psychological distress, coping and quality of
- 35 life in Chinese patients with newly diagnosed gastric cancer. *Journal of Clinical Nursing* 2015;
- 36 24: 2439-2447.
- 37 19. van Laarhoven HWM, Schilderman J, Bleijenberg G et al. Coping, Quality of Life,
- 38 Depression, and Hopelessness in Cancer Patients in a Curative and Palliative, End-of-Life
- 39 Care Setting. *Cancer Nursing* 2011; 34: 302-314.
- 40 20. Sorato DB, Osorio FL. Coping, psychopathology, and quality of life in cancer patients
- 41 under palliative care. *Palliative & Supportive Care* 2015; 13: 517-525.
- 42 21. Xu L, Pan QO, Lin RQ. Prevalence rate and influencing factors of preoperative anxiety
- 43 and depression in gastric cancer patients in China: Preliminary study. *Journal of*
- 44 *International Medical Research* 2016; 44: 377-388.
- 45 22. He GP, Liu S. Quality of life and coping styles in Chinese nasopharyngeal cancer
- 46 patients after hospitalization. *Cancer Nursing* 2005; 28: 179-186.
- 47 23. Nakamura YM, Orth U. Acceptance as a coping reaction: adaptive or not? *Swiss*
- 48 *Journal of Psychology* 2005; 64: 281-292.
- 49
- 50
- 51
- 52
- 53
- 54
- 55
- 56
- 57
- 58
- 59

## COPING, MOOD AND HRQOL IN LUNG CANCER PATIENTS

24. Feifel H, Strack S, Nagy VT. Degree of life-threat and differential use of coping modes. *Journal of Psychosomatic Research* 1987; 31: 91-99.
25. Hayes SC, Luoma JB, Bond FW et al. Acceptance and commitment therapy: Model, processes and outcomes. *Behaviour Research and Therapy* 2006; 44: 1-25.
26. Hack TF, Degner LF. Coping responses following breast cancer diagnosis predict psychological adjustment three years later. *Psycho-Oncology* 2004; 13: 235-247.
27. Yeung NCY, Lu Q. Affect mediates the association between mental adjustment styles and quality of life among Chinese cancer survivors. *Journal of Health Psychology* 2014; 19: 1420-1429.
28. Goss PE, Strasser-Weippl K, Lee-Bychkovsky BL et al. Challenges to effective cancer control in China, India, and Russia. *Lancet Oncology* 2014; 15: 489-538.
29. Chen H, Komaromy C, Valentine C. From hope to hope: The experience of older Chinese people with advanced cancer. *Health* 2015; 19: 154-171.
30. Bai Q, Zhang ZG, Lu XQ et al. Attitudes towards palliative care among patients and health professionals in Henan, China. *Progress in Palliative Care* 2010; 18: 341-345.
31. Park CL, Iacocca MO. A stress and coping perspective on health behaviors: theoretical and methodological considerations. *Anxiety, Stress, & Coping* 2014; 27: 123-137.
32. Drach-Zahavy A, Somech A. Coping with health problems: the distinctive relationships of Hope sub-scales with constructive thinking and resource allocation. *Personality and Individual Differences* 2002; 33: 103-117.
33. Billings DW, Folkman S, Acree M, Moskowitz JT. Coping and physical health during caregiving: The roles of positive and negative affect. *Journal of Personality and Social Psychology* 2000; 79: 131-142.
34. Katter JKQ, Greenglass E. The Influence of Mood on the Relation between Proactive Coping and Rehabilitation Outcomes. *Canadian Journal on Aging-Revue Canadienne Du Vieillissement* 2013; 32: 13-20.
35. Rueda B, Perez-Garcia AM. Coping strategies, depressive symptoms and quality of life in hypertensive patients: Mediatonal and prospective relations. *Psychology & Health* 2013; 28: 1152-1170.
36. Folkman S, Greer S. Promoting psychological well-being in the face of serious illness: When theory, research and practice inform each other. *Psycho-Oncology* 2000; 9: 11-19.
37. Roberts D, Calman L, Large P et al. A revised model for coping with advanced cancer. Mapping concepts from a longitudinal qualitative study of patients and carers coping with advanced cancer onto Folkman and Greer's theoretical model of appraisal and coping. *Psycho-Oncology* 2018; 27: 229-235.
38. Hirsch JK, Floyd AR, Duberstein PR. Perceived health in lung cancer patients: the role of positive and negative affect. *Quality of Life Research* 2012; 21: 187-194.
39. Weitzner MA, Meyers CA, Stuebing KK, Saleeba AK. Relationship between quality of life and mood in long-term survivors of breast cancer treated with mastectomy. *Supportive Care in Cancer* 1997; 5: 241-248.
40. Stellar JE, John-Henderson N, Anderson CL et al. Positive Affect and Markers of Inflammation: Discrete Positive Emotions Predict Lower Levels of Inflammatory Cytokines. *Emotion* 2015; 15: 129-133.
41. Messay B, Lim A, Marsland AL. Current understanding of the bi-directional relationship of major depression with inflammation. *Biology of Mood & Anxiety Disorders* 2012; 2.

## COPING, MOOD AND HRQOL IN LUNG CANCER PATIENTS

- 1
- 2
- 3 42. Fredrickson BL. The broaden-and-build theory of positive emotions. *Philosophical Transactions of the Royal Society of London Series B-Biological Sciences* 2004; 359: 1367-1377.
- 4
- 5
- 6 43. Garland EL, Fredrickson B, Kring AM et al. Upward spirals of positive emotions counter downward spirals of negativity: Insights from the broaden-and-build theory and affective neuroscience on the treatment of emotion dysfunctions and deficits in psychopathology. *Clinical Psychology Review* 2010; 30: 849-864.
- 7
- 8
- 9
- 10 44. Raijmakers NJH, Zijlstra M, van Roij J et al. Health-related quality of life among cancer patients in their last year of life: results from the PROFILES registry. *Supportive Care in Cancer* 2018.
- 11
- 12
- 13
- 14 45. Luo N, Li MH, Liu GG et al. Developing the Chinese version of the new 5-level EQ-5D descriptive system: the response scaling approach. *Quality of Life Research* 2013; 22: 885-890.
- 15
- 16
- 17
- 18 46. Feng Y, Devlin N, Shah K et al. New methods for modelling EQ-5D-5L value sets: an application to English data. 2016.
- 19
- 20 47. Deng MH, Lan YH, Luo SL. Quality of life estimate in stomach, colon, and rectal cancer patients in a hospital in China. *Tumor Biology* 2013; 34: 2809-2815.
- 21
- 22 48. Watson D, Clark LA, Tellegen A. Development and validation of brief measures of positive and negative affect-The PANAS scales. *Journal of Personality and Social Psychology* 1988; 54: 1063-1070.
- 23
- 24
- 25 49. Preacher KJ, Hayes AF. Asymptotic and resampling strategies for assessing and comparing indirect effects in multiple mediator models. *Behavior research methods* 2008; 40: 879-891.
- 26
- 27
- 28
- 29 50. Schoemann AM, Boulton AJ, Short SD. Determining Power and Sample Size for Simple and Complex Mediation Models. *Social Psychological and Personality Science* 2017; 8: 379-386.
- 30
- 31
- 32 51. Shen YJ, Wu B, Wang XH, Zhu J. Health state utilities in patients with advanced non-small-cell lung cancer in China. *Journal of Comparative Effectiveness Research* 2018; 7: 443-452.
- 33
- 34
- 35
- 36 52. Perrone F, Jommi C, Di Maio M et al. The association of financial difficulties with clinical outcomes in cancer patients: secondary analysis of 16 academic prospective clinical trials conducted in Italy. *Annals of Oncology* 2016; 27: 2224-2229.
- 37
- 38 53. Trudel-Fitzgerald C, Qureshi F, Appleton AA, Kubzansky LD. A healthy mix of emotions: underlying biological pathways linking emotions to physical health. *Current Opinion in Behavioral Sciences* 2017; 15: 16-21.
- 39
- 40
- 41 54. Walker MS, Larsen RJ, Zona DM et al. Smoking urges and relapse among lung cancer patients: findings from a preliminary retrospective study. *Preventive Medicine* 2004; 39: 449-457.
- 42
- 43
- 44
- 45 55. Chouaid C, Agulnik J, Goker E et al. Health-Related Quality of Life and Utility in Patients with Advanced Non-Small-Cell Lung Cancer: A Prospective Cross-Sectional Patient Survey in a Real-World Setting. *Journal of Thoracic Oncology* 2013; 8: 997-1003.
- 46
- 47
- 48 56. van Roij J, Fransen H, van de Poll-Franse L et al. Measuring health-related quality of life in patients with advanced cancer: a systematic review of self-administered measurement instruments. *Quality of Life Research* 2018; 27: 1937-1955.
- 49
- 50
- 51 57. Rost AD, Wilson K, Buchanan E et al. Improving Psychological Adjustment Among Late-Stage Ovarian Cancer Patients: Examining the Role of Avoidance in Treatment. *Cognitive and Behavioral Practice* 2012; 19: 508-517.
- 52
- 53
- 54
- 55
- 56
- 57
- 58
- 59
- 60

## COPING, MOOD AND HRQOL IN LUNG CANCER PATIENTS

1  
2  
3 58. Feros DL, Lane L, Ciarrochi J, Blackledge JT. Acceptance and Commitment Therapy  
4 (ACT) for improving the lives of cancer patients: a preliminary study. *Psycho-Oncology* 2013;  
5 22: 459-464.

6 59. Greer JA, Jacobs JM, El-Jawahri A et al. Role of Patient Coping Strategies in  
7 Understanding the Effects of Early Palliative Care on Quality of Life and Mood. *Journal of*  
8 *Clinical Oncology* 2018; 36: 53-60.  
9

10  
11  
12  
13  
14  
15  
16  
17  
18  
19  
20  
21  
22  
23  
24  
25  
26  
27  
28  
29  
30  
31  
32  
33  
34  
35  
36  
37  
38  
39  
40  
41  
42  
43  
44  
45  
46  
47  
48  
49  
50  
51  
52  
53  
54  
55  
56  
57  
58  
59  
60

For peer review only

1  
2  
3  
4  
5  
6  
7  
8  
9  
10  
11  
12  
13  
14  
15  
16  
17  
18  
19  
20  
21  
22  
23  
24  
25  
26  
27  
28  
29  
30  
31  
32  
33  
34  
35  
36  
37  
38  
39  
40  
41  
42  
43  
44  
45  
46  
47  
48  
49  
50  
51  
52  
53  
54  
55  
56  
57  
58  
59  
60



Positive and negative mood as mediators of the association between coping and HRQoL

Table 1 Mood and Health-related Quality of Life by Socio-demographic and Clinical Characteristics

| Variables                                        | M(SD) / n (%) | Positive mood | Negative mood | Mobility    | Self-care   | Usual activities | Pain/discomfort | Anxiety/depression | EQ-5D utility index |
|--------------------------------------------------|---------------|---------------|---------------|-------------|-------------|------------------|-----------------|--------------------|---------------------|
| <b>Age (years)</b>                               | 59.99 (9.53)  |               |               |             |             |                  |                 |                    |                     |
| <b>Gender</b>                                    |               |               |               |             |             |                  |                 |                    |                     |
| Male                                             | 183 (70.1%)   | 2.41 (0.75)   | 1.80 (0.73)   | 4.39 (0.95) | 4.63 (0.79) | 4.33 (0.92)      | 4.03 (0.87)     | 4.24 (0.75)        | 0.81 (0.17)         |
| Female                                           | 78 (29.9%)    | 2.34 (0.78)   | 1.93 (0.83)   | 4.21 (1.04) | 4.50 (0.96) | 4.06 (1.05)      | 3.91 (0.87)     | 4.21 (0.65)        | 0.78 (0.21)         |
| <b>Education</b>                                 |               |               |               |             |             |                  |                 |                    |                     |
| Elementary school or lower                       | 55 (21.1%)    | 2.28 (0.79)   | 1.82 (0.73)   | 4.54 (0.92) | 4.64 (0.80) | 4.31 (0.96)      | 3.98 (0.91)     | 4.11 (0.74)        | 0.80 (0.18)         |
| Middle school                                    | 91 (34.9%)    | 2.35 (0.69)   | 1.94 (0.79)   | 4.24 (0.96) | 4.57 (0.86) | 4.14 (1.04)      | 3.90 (0.87)     | 4.16 (0.79)        | 0.78 (0.19)         |
| High school                                      | 66 (25.3%)    | 2.46 (0.77)   | 1.71 (0.63)   | 4.32 (1.08) | 4.59 (0.89) | 4.29 (0.96)      | 4.05 (0.79)     | 4.32 (0.66)        | 0.82 (0.17)         |
| College or higher                                | 49 (18.8%)    | 2.51 (0.84)   | 1.83 (0.88)   | 4.41 (0.96) | 4.59 (0.84) | 4.35 (0.86)      | 4.10 (0.94)     | 4.35 (0.63)        | 0.83 (0.20)         |
| <b>Marital status</b>                            |               |               |               |             |             |                  |                 |                    |                     |
| Married                                          | 247 (94.6%)   | 2.40 (0.77)   | 1.83 (0.76)   | 4.34 (0.98) | 4.60 (0.85) | 4.25 (0.98)      | 3.98 (0.89)     | 4.23 (0.71)        | 0.80 (0.19)         |
| Single/divorced/<br>widowed                      | 14 (5.4%)     | 2.23 (0.58)   | 1.86 (0.82)   | 4.21 (1.05) | 4.57 (0.85) | 4.29 (0.83)      | 4.21 (0.58)     | 4.07 (1.00)        | 0.78 (0.18)         |
| <b>Perceived cancer-related financial burden</b> |               |               |               |             |             |                  |                 |                    |                     |
| None                                             | 37 (14.2%)    | 2.72 (0.89)   | 1.47 (0.50)   | 4.86 (0.42) | 4.92 (0.28) | 4.81 (0.46)      | 4.51 (0.56)     | 4.59 (0.50)        | 0.92 (0.08)         |
| Slight                                           | 100 (38.3%)   | 2.27 (0.74)   | 1.74 (0.63)   | 4.21 (1.09) | 4.54 (0.88) | 4.23 (0.91)      | 3.91 (0.79)     | 4.22 (0.56)        | 0.78 (0.19)         |
| Moderate                                         | 63 (24.1%)    | 2.53 (0.80)   | 1.87 (0.74)   | 4.43 (0.86) | 4.65 (0.79) | 4.17 (0.98)      | 3.90 (0.93)     | 4.27 (0.70)        | 0.80 (0.18)         |
| Severe                                           | 36 (13.8%)    | 2.16 (0.51)   | 1.94 (0.84)   | 4.25 (0.77) | 4.64 (0.68) | 4.22 (0.90)      | 4.06 (1.01)     | 4.19 (0.71)        | 0.82 (0.14)         |
| Very Severe                                      | 25 (9.6%)     | 2.38 (0.62)   | 2.52 (1.02)   | 3.96 (1.34) | 4.12 (1.33) | 3.76 (1.42)      | 3.68 (0.95)     | 3.64 (1.19)        | 0.68 (0.26)         |
| <b>Time since diagnosis<sup>a</sup></b>          |               |               |               |             |             |                  |                 |                    |                     |
| Less than 6 months                               | 144 (55.2%)   | 2.38 (0.77)   | 1.84 (0.77)   | 4.40 (0.96) | 4.60 (0.84) | 4.24 (1.02)      | 3.95 (0.90)     | 4.19 (0.76)        | 0.80 (0.19)         |
| 6-12months                                       | 32 (12.3%)    | 2.54 (0.68)   | 1.91 (0.72)   | 4.19 (1.28) | 4.50 (1.05) | 4.19 (1.12)      | 4.19 (0.78)     | 4.19 (0.82)        | 0.79 (0.23)         |
| 12-24 months                                     | 31 (11.9%)    | 2.54 (0.87)   | 1.71 (0.75)   | 4.35 (0.80) | 4.71 (0.53) | 4.42 (0.62)      | 3.97 (0.71)     | 4.32 (0.65)        | 0.83 (0.11)         |



|    |                                     |             |             |             |             |             |             |             |             |             |
|----|-------------------------------------|-------------|-------------|-------------|-------------|-------------|-------------|-------------|-------------|-------------|
| 1  |                                     |             |             |             |             |             |             |             |             |             |
| 2  |                                     |             |             |             |             |             |             |             |             |             |
| 3  | More than 24                        | 46 (17.6%)  | 2.25 (0.72) | 1.86 (0.75) | 4.17 (1.00) | 4.48 (0.96) | 4.17 (0.93) | 3.91 (0.96) | 4.26 (0.61) | 0.78 (0.20) |
| 4  | months                              |             |             |             |             |             |             |             |             |             |
| 5  | <b>Stage</b>                        |             |             |             |             |             |             |             |             |             |
| 6  | III                                 | 82 (31.4%)  | 2.50 (0.71) | 1.96 (0.90) | 4.35 (0.93) | 4.55 (0.86) | 4.20 (1.09) | 3.95 (0.94) | 4.13 (0.78) | 0.79 (0.19) |
| 7  | IV                                  | 179 (68.6%) | 2.34 (0.78) | 1.78 (0.68) | 4.33 (1.00) | 4.61 (0.84) | 4.28 (0.91) | 4.01 (0.84) | 4.27 (0.69) | 0.81 (0.18) |
| 8  | <b>Lung cancer type<sup>b</sup></b> |             |             |             |             |             |             |             |             |             |
| 9  | NSC-                                | 140 (53.6%) | 2.39 (0.78) | 1.88 (0.79) | 4.28 (0.99) | 4.56 (0.85) | 4.20 (0.94) | 3.91 (0.92) | 4.18 (0.70) | 0.79 (0.19) |
| 10 | Adenocarcinoma                      |             |             |             |             |             |             |             |             |             |
| 11 | NSC-Squamous                        | 47 (18.0%)  | 2.50 (0.81) | 1.84 (0.80) | 4.45 (0.85) | 4.68 (0.63) | 4.32 (0.86) | 4.00 (0.81) | 4.26 (0.57) | 0.81 (0.14) |
| 12 | NSC-Poorly                          | 24 (9.2%)   | 2.46 (0.61) | 1.77 (0.67) | 4.08 (1.25) | 4.38 (1.21) | 3.88 (1.39) | 3.75 (0.94) | 4.13 (0.99) | 0.72 (0.24) |
| 13 | differentiated                      |             |             |             |             |             |             |             |             |             |
| 14 | NSC-others                          | 7 (2.7%)    | 2.30 (0.60) | 1.64 (0.40) | 4.71 (0.49) | 5.00 (0.00) | 4.71 (0.49) | 4.71 (0.49) | 4.57 (0.53) | 0.92 (0.10) |
| 15 | Small cell                          | 43 (16.5%)  | 2.26 (0.76) | 1.76 (0.71) | 4.49 (0.96) | 4.67 (0.87) | 4.49 (0.88) | 4.26 (0.73) | 4.35 (0.78) | 0.85 (0.17) |
| 16 | <b>Treatment</b>                    |             |             |             |             |             |             |             |             |             |
| 17 | Received surgery                    |             |             |             |             |             |             |             |             |             |
| 18 | Yes                                 | 61 (23.4%)  | 2.49 (0.78) | 1.95 (0.85) | 4.20 (0.98) | 4.51 (0.83) | 4.20 (0.96) | 3.97 (0.86) | 4.30 (0.74) | 0.80 (0.18) |
| 19 | No                                  | 200 (76.6%) | 2.36 (0.75) | 1.80 (0.73) | 4.38 (0.98) | 4.62 (0.85) | 4.27 (0.97) | 4.00 (0.88) | 4.21 (0.72) | 0.80 (0.19) |
| 20 | Received                            |             |             |             |             |             |             |             |             |             |
| 21 | chemotherapy                        |             |             |             |             |             |             |             |             |             |
| 22 | Yes                                 | 252 (96.6%) | 2.40 (0.76) | 1.83 (0.76) | 4.33 (0.99) | 4.59 (0.86) | 4.25 (0.98) | 4.00 (0.87) | 4.22 (0.73) | 0.80 (0.19) |
| 23 | No                                  | 9 (3.4%)    | 2.16 (0.68) | 1.83 (0.72) | 4.44 (0.73) | 4.67 (0.50) | 4.33 (0.71) | 3.67 (1.00) | 4.33 (0.50) | 0.81 (0.16) |
| 24 | Received                            |             |             |             |             |             |             |             |             |             |
| 25 | radiotherapy                        |             |             |             |             |             |             |             |             |             |
| 26 | Yes                                 | 61 (23.4%)  | 2.36 (0.70) | 2.04 (0.87) | 4.05 (1.19) | 4.33 (1.21) | 4.02 (1.09) | 3.74 (1.05) | 4.13 (0.62) | 0.74 (0.23) |
| 27 | No                                  | 200 (76.6%) | 2.40 (0.78) | 1.77 (0.71) | 4.43 (0.89) | 4.68 (0.69) | 4.33 (0.92) | 4.07 (0.80) | 4.26 (0.75) | 0.82 (0.16) |
| 28 | Received targeted                   |             |             |             |             |             |             |             |             |             |
| 29 | therapy                             |             |             |             |             |             |             |             |             |             |
| 30 | Yes                                 | 38 (14.6%)  | 2.24 (0.79) | 1.83 (0.56) | 4.21 (1.14) | 4.47 (1.08) | 4.11 (1.09) | 3.79 (1.04) | 4.26 (0.64) | 0.77 (0.25) |
| 31 | No                                  | 223 (85.4%) | 2.42 (0.75) | 1.83 (0.79) | 4.36 (0.95) | 4.61 (0.80) | 4.28 (0.95) | 4.03 (0.84) | 4.22 (0.74) | 0.81 (0.17) |
| 32 |                                     |             |             |             |             |             |             |             |             |             |
| 33 |                                     |             |             |             |             |             |             |             |             |             |
| 34 |                                     |             |             |             |             |             |             |             |             |             |
| 35 |                                     |             |             |             |             |             |             |             |             |             |
| 36 |                                     |             |             |             |             |             |             |             |             |             |
| 37 |                                     |             |             |             |             |             |             |             |             |             |
| 38 |                                     |             |             |             |             |             |             |             |             |             |
| 39 |                                     |             |             |             |             |             |             |             |             |             |
| 40 |                                     |             |             |             |             |             |             |             |             |             |
| 41 |                                     |             |             |             |             |             |             |             |             |             |
| 42 |                                     |             |             |             |             |             |             |             |             |             |
| 43 |                                     |             |             |             |             |             |             |             |             |             |
| 44 |                                     |             |             |             |             |             |             |             |             |             |
| 45 |                                     |             |             |             |             |             |             |             |             |             |
| 46 |                                     |             |             |             |             |             |             |             |             |             |

1  
2  
3 Scale range: Confrontation, resigned acceptance: 1 (never) – 4 (very often); Positive mood, negative mood: 1 (very slightly) – 5 (extremely);  
4 Mobility, self-care, usual activities, pain/discomfort, anxiety/depression: 1 (very severe) – 5 (no); EQ-5D utility index: -1 (worse than death) – 1  
5 (full health)  
6  
7  
8  
9  
10  
11  
12  
13  
14  
15  
16  
17  
18  
19  
20  
21  
22  
23  
24  
25  
26  
27  
28  
29  
30  
31  
32  
33  
34  
35  
36  
37  
38  
39  
40  
41  
42  
43  
44  
45  
46

For peer review only

Figure 1 Flow Chart of the Sample Selection Procedure

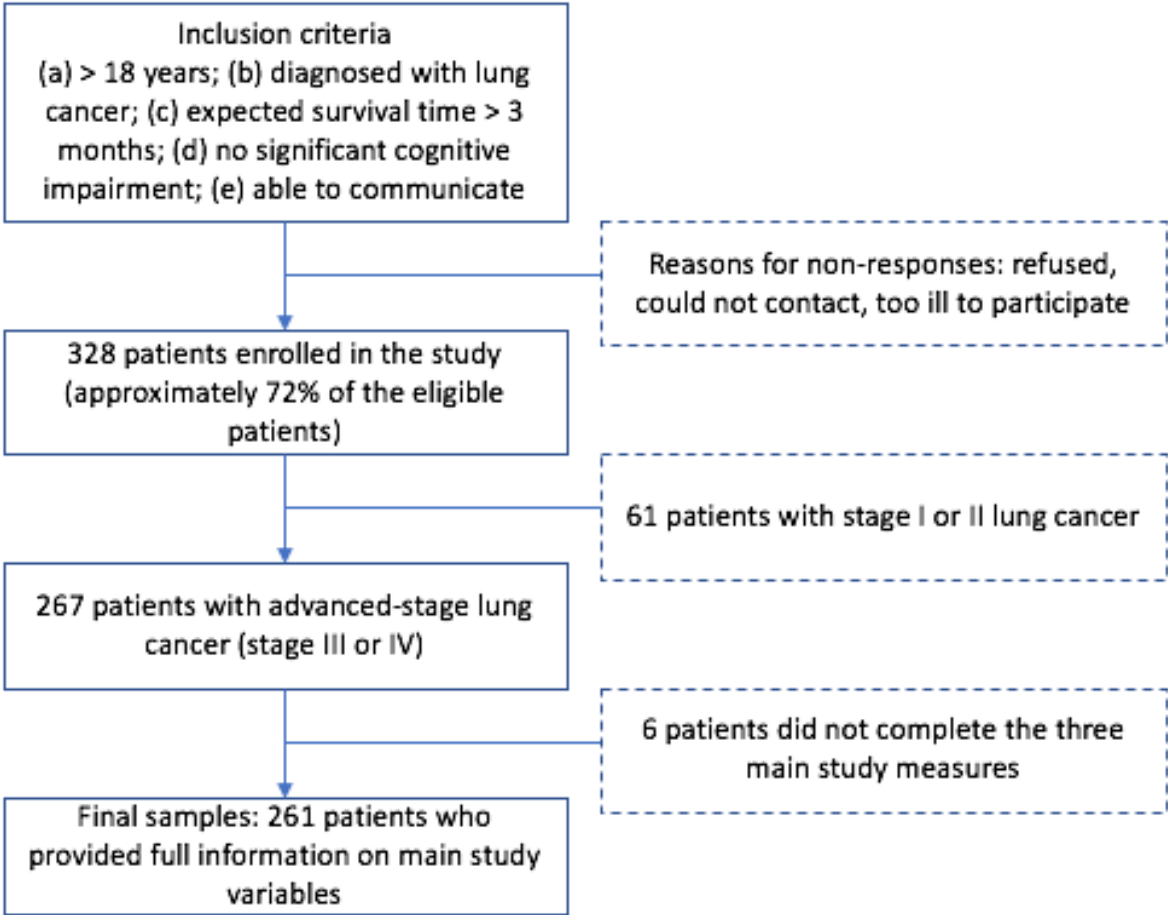

# BMJ Open

## Coping, mood, and health-related quality of life: A cross-sectional study in Chinese patients with advanced lung cancer

|                                 |                                                                                                                                                                                                                                                                                                                                                                                                                                                                                                                                                                                                                                                                                                                                                                                                                                                                                                                                                                                                                                                                                                                                                                                                            |
|---------------------------------|------------------------------------------------------------------------------------------------------------------------------------------------------------------------------------------------------------------------------------------------------------------------------------------------------------------------------------------------------------------------------------------------------------------------------------------------------------------------------------------------------------------------------------------------------------------------------------------------------------------------------------------------------------------------------------------------------------------------------------------------------------------------------------------------------------------------------------------------------------------------------------------------------------------------------------------------------------------------------------------------------------------------------------------------------------------------------------------------------------------------------------------------------------------------------------------------------------|
| Journal:                        | <i>BMJ Open</i>                                                                                                                                                                                                                                                                                                                                                                                                                                                                                                                                                                                                                                                                                                                                                                                                                                                                                                                                                                                                                                                                                                                                                                                            |
| Manuscript ID                   | bmjopen-2018-023672.R2                                                                                                                                                                                                                                                                                                                                                                                                                                                                                                                                                                                                                                                                                                                                                                                                                                                                                                                                                                                                                                                                                                                                                                                     |
| Article Type:                   | Research                                                                                                                                                                                                                                                                                                                                                                                                                                                                                                                                                                                                                                                                                                                                                                                                                                                                                                                                                                                                                                                                                                                                                                                                   |
| Date Submitted by the Author:   | 27-Nov-2018                                                                                                                                                                                                                                                                                                                                                                                                                                                                                                                                                                                                                                                                                                                                                                                                                                                                                                                                                                                                                                                                                                                                                                                                |
| Complete List of Authors:       | <p>He, Yaping; Shanghai Jiao Tong University, School of Public Health; Shanghai Jiao Tong University, Center for Health Technology Assessment, Shanghai Jiao Tong University China Hospital Development Institute</p> <p>Jian, Hong; Shanghai Chest Hospital, Shanghai Jiao Tong University, Department of Oncology</p> <p>Yan, Meiqiong; Shanghai Chest Hospital, Shanghai Jiao Tong University, Department of Oncology</p> <p>Zhu, Jingfen; Shanghai Jiao Tong University, School of Public Health; Shanghai Jiao Tong University, Center for Health Technology Assessment, Shanghai Jiao Tong University China Hospital Development Institute</p> <p>Li, Guohong; Shanghai Jiao Tong University, School of Public Health; Shanghai Jiao Tong University, Center for Health Technology Assessment, Shanghai Jiao Tong University China Hospital Development Institute</p> <p>Lou, Vivian W. Q.; The University of Hong Kong, Department of Social Work &amp; Social Administration; The University of Hong Kong, Sau Po Centre on Ageing</p> <p>Chen, Jieling; The University of Hong Kong, Department of Social Work and Social Administration; The University of Hong Kong, Sau Po Centre on Aging</p> |
| <b>Primary Subject Heading</b>: | Oncology                                                                                                                                                                                                                                                                                                                                                                                                                                                                                                                                                                                                                                                                                                                                                                                                                                                                                                                                                                                                                                                                                                                                                                                                   |
| Secondary Subject Heading:      | Patient-centred medicine                                                                                                                                                                                                                                                                                                                                                                                                                                                                                                                                                                                                                                                                                                                                                                                                                                                                                                                                                                                                                                                                                                                                                                                   |
| Keywords:                       | coping, quality of life, lung cancer, mood                                                                                                                                                                                                                                                                                                                                                                                                                                                                                                                                                                                                                                                                                                                                                                                                                                                                                                                                                                                                                                                                                                                                                                 |
|                                 |                                                                                                                                                                                                                                                                                                                                                                                                                                                                                                                                                                                                                                                                                                                                                                                                                                                                                                                                                                                                                                                                                                                                                                                                            |

SCHOLARONE™  
Manuscripts

## COPING, MOOD AND HRQOL IN LUNG CANCER PATIENTS

Coping, mood, and health-related quality of life: A cross-sectional study in Chinese patients  
with advanced lung cancer

He, Yaping <sup>1,2</sup>

Jian, Hong <sup>3</sup>

Yan, Meiqiong <sup>3</sup>

Zhu, Jingfen <sup>1,2</sup>

Li, Guohong <sup>1,2</sup>

Lou, Weiqun, Vivian <sup>4,5</sup>

Chen, Jieling <sup>4,5</sup>

Affiliation:

1. School of Public Health, Shanghai Jiao Tong University
2. Center for Health Technology Assessment, Shanghai Jiao Tong University China  
Hospital Development Institute
3. Department of Oncology, Shanghai Chest Hospital, Shanghai Jiao Tong University
4. Department of Social Work & Social Administration, The University of Hong Kong
5. Sau Po Centre on Ageing, The University of Hong Kong

Corresponding author: Chen Jieling, Elaine, Department of Social Work & Social  
Administration, The University of Hong Kong, Pokfulam Road, Hong Kong,  
elaine09@connect.hku.hk; Lou, Weiqun, Vivian, PhD, Department of Social Work & Social  
Administration, Sau Po Centre on Ageing, The University of Hong Kong, Pokfulam Road,  
Hong Kong, (+852)39174835, wlou@hku.hk.

## COPING, MOOD AND HRQOL IN LUNG CANCER PATIENTS

## Abstract

**Objectives:** The ways patients cope with advanced cancer can influence their health-related quality of life (HRQoL). This study aims to examine the mediating role of positive and negative mood in the relationship between coping and HRQoL in patients with advanced lung cancer.

**Methods:** A consecutive sample of 261 patients (mean age: 59.99±9.53) diagnosed with stage III or IV lung cancer was recruited from the inpatient unit in a hospital that specializes in chest-related disease in Shanghai, China. Participants completed measurements including Medical Coping Modes Questionnaire, Positive and Negative Affect Schedule, and 5-level EuroQol 5-dimension instrument.

**Results:** Although the total effects of confrontation on HRQoL were not significant, competing indirect effects via mood were identified: (1) Positive indirect effects through positive mood were found for confrontation on mobility, usual activities, pain/discomfort, and overall utility index (indirect effect = 0.01, 95% CI 0.003 to 0.03); (2) Negative indirect effects through negative mood were found for confrontation on mobility, pain/discomfort, anxiety/depression, and overall utility index (indirect effect = -0.01, 95% CI -0.03 to -0.001 ). Resigned acceptance was negatively associated with HRQoL, and indirect effects via mood were identified: (1) Negative indirect effects through positive mood were found for resigned acceptance on mobility, self-care, usual activities, pain/discomfort, and overall utility index (indirect effect = -0.01, 95% CI -0.03 to -0.003); (2) Negative indirect effects through negative mood were found for resigned acceptance on domains of HRQoL and overall utility index (indirect effect = -0.04, 95% CI -0.06 to -0.02).

**Conclusions:** Confronting advanced lung cancer can fuel ambivalent emotional experiences. Nevertheless, accepting the illness in a resigned way can be maladaptive for health outcomes.

## COPING, MOOD AND HRQOL IN LUNG CANCER PATIENTS

The findings suggest interventions that facilitate adaptive coping, reduce negative mood, and enhance positive mood, as this could help to improve or maintain HRQoL in patients with advanced lung cancer.

**Keywords:** coping; quality of life; mood; lung cancer

## Strengths and limitations of this study

- The study addressed health-related quality of life (HRQoL), an important health outcome of treatment for advanced lung cancer, and examined the psychological factors associated with HRQoL.
- The study examined the mediating role of positive and negative mood in the relationship between coping and a range of health outcomes (mobility, self-care, usual activities, pain/discomfort, anxiety/depression, overall HRQoL), which identifies the potential pathways between coping and HRQoL in patients with advanced lung cancer.
- Consecutive sampling could compromise the generalizability of the findings.
- Cross-sectional design.

## 1. Introduction

During the past decade, lung cancer has become the most common incident cancer and the leading cause of cancer mortality in China and many other countries [1, 2]. The diagnosis of lung cancer can result in enormous stress for patients and their families, such as symptom burden [3], decisions about treatment options [4], and financial concerns [5]. The quality of life is significantly affected in patients with an advanced lung cancer [6]. The curative treatments are limited for advanced lung cancer, and the five-year survival rate of lung cancer is 16.1% in China [7]. Improving or maintaining quality of life is the main focus of treatment. The prognostic value of health-related quality of life (HRQoL) in patients with lung cancer is supported by a range of studies [8, 9].

Previous research has investigated socio-demographic, clinical, and psychosocial correlates of HRQoL in cancer patients [10]. Common risk factors identified from previous studies included older age, being female, financial burden, and advanced stage [11]. Specifically, coping strategy is indicated to contribute to HRQoL in patients with advanced cancer [12, 13]. The manner in which patients cope with the life-threatening illness may affect patients' emotional state, perceptions of illness, and health behaviors, which can have an impact on the treatment course and ultimately health outcomes [14]. Two coping strategies, confrontation and acceptance, have received considerable attention in patients with a life-threatening illness [14-17].

Confrontation is defined as a set of coping strategies that involves seeking information and advice from various sources, seeking support from family and friends, and engaging in decision making [15]. It is actively oriented, which is indicated to be adaptive for cancer patients and associated with lower negative mood [18-20] and better quality of life [16, 17]. However, other studies found insignificant associations between confrontation and



## COPING, MOOD AND HRQOL IN LUNG CANCER PATIENTS

1  
2  
3 health outcomes among cancer patients [14, 21, 22]. For instance, Nipp et al. [14] studied 350  
4  
5 patients with incurable lung or gastrointestinal cancer, and found that using active coping was  
6  
7 not associated with psychological distress or quality of life. It is suggested that confrontation  
8  
9 could direct one's attention to the disease and its side effects, making it less effective in  
10  
11 coping with cancer [15, 17].  
12  
13  
14

15 Acceptance is regarded as a strategy to cope with unchangeable or uncontrollable  
16  
17 negative events [23]. Resigned acceptance is a form of acceptance, specifically, a passive  
18  
19 form of acceptance, in which individuals accept the stressful situation and give up endeavors  
20  
21 or hope to deal with it [23, 24]. It is different from the concept of acceptance in Acceptance  
22  
23 and Commitment Therapy, which is a form of active acceptance and characterized by active  
24  
25 embracing of thoughts and feelings without unnecessary attempts to alter them [25]. Research  
26  
27 shows that resigned acceptance could be maladaptive, which was associated with less  
28  
29 favorable outcomes, such as negative mood and lower quality of life, in cancer patients and  
30  
31 survivors [21, 26, 27].  
32  
33  
34  
35

36 Confrontation and resigned acceptance may be associated with cultural views of  
37  
38 illness in the Chinese cancer population. Confucianism and Taoism are two dominant  
39  
40 philosophical tenets in Chinese culture [28]. Confucian beliefs emphasize the importance of  
41  
42 life, and death is a taboo and perceived as a negative event [29]. Consistent with this, the  
43  
44 majority of patients and their families in China would choose to continue curative treatments  
45  
46 to sustain and prolong life until the end of life [30]. On the other hand, cancer and other  
47  
48 illness are believed to be an act of Ming (also known as fate) in the Taoist belief system [28].  
49  
50 The fatalistic attitude toward cancer may lead to resigned acceptance, which may affect  
51  
52 health outcomes during the illness trajectory [28].  
53  
54  
55  
56  
57  
58  
59  
60

## COPING, MOOD AND HRQOL IN LUNG CANCER PATIENTS

1  
2  
3  
4  
5  
6  
7  
8  
9  
10  
11  
12  
13  
14  
15  
16  
17  
18  
19  
20  
21  
22  
23  
24  
25  
26  
27  
28  
29  
30  
31  
32  
33  
34  
35  
36  
37  
38  
39  
40  
41  
42  
43  
44  
45  
46  
47  
48  
49  
50  
51  
52  
53  
54  
55  
56  
57  
58  
59  
60

Although research shows that coping is associated with HRQoL in cancer patients, the mechanism of the link between coping and HRQoL remains largely unexamined in cancer patients. Preliminary exploration suggests that mood may be a potential pathway between coping and health outcomes [31-35]. Folkman and Greer developed a model of stress and coping for serious illness, and Roberts et al. revised the model based on studies among patients with advanced cancer [36, 37]. The models highlight the association between coping and emotional outcomes in the face of cancer, as the way patients cope with the stressors can influence the emotional outcomes, leading to positive and/or negative emotion [36, 37]. On the other hand, studies indicate that mood is linked to health outcomes (e.g., HRQoL) in cancer patients and survivors [27, 38, 39]. Negative and positive mood involves different physiological responses (e.g., nervous, endocrine, and immune system functioning), which can influence overall physical health [40, 41]. Additionally, the broaden-and-build theory of positive mood indicates that positive mood can broaden one's attention scope and thought-action repertoires, which could be beneficial for physical health. In contrast, negative mood can fuel a narrowed, socially isolating thought-action tendencies, which could result in poor health outcomes [42, 43]. Given that coping strategies are related to mood, and that mood is related to HRQoL, it is possible that mood may be a mediational pathway between coping and HRQoL. In a prospective study among HIV caregivers, higher social coping predicted an increase in positive affect, which decreased levels of physical symptoms, whereas higher cognitive avoidance predicted enhanced negative affect, which resulted in higher levels of physical symptoms [33]. However, in the context of advanced cancer, to our knowledge, no study has examined the pathways between coping and HRQoL through mood. Since patients with advanced cancer can encounter numerous stresses, understanding the effect of coping on health and identifying the pathways through which patients maintain health and quality of life can provide important insights for clinical practice and interventions.

## COPING, MOOD AND HRQOL IN LUNG CANCER PATIENTS

1  
2  
3 In summary, the current study addresses the relationships between coping, mood, and  
4 HRQoL among patients with advanced lung cancer. Specifically, we examined the effect of  
5 confrontation and resigned acceptance coping on positive mood, negative mood, and  
6 HRQoL. We also tested the mediating role of positive and negative mood in the relationship  
7 between coping and HRQoL among Chinese patients with advanced lung cancer.  
8  
9  
10  
11  
12  
13  
14  
15  
16  
17

## 2. Method

### 2.1 Study setting and participants

18  
19  
20  
21  
22  
23  
24 Participants were recruited from the inpatient unit of the department of chest-  
25 oncology medicine at a public hospital that specializes in chest-related disease in Shanghai,  
26 China. The hospital is well recognized for its expertise, resources, and treatments for chest-  
27 related disease. A large number of patients with lung cancer in east China come to this  
28 hospital and receive treatment there. Patients were eligible in the study if they (a) were 18  
29 years or older, (b) had been diagnosed with lung cancer, (c) had an expected survival time > 3  
30 months, (d) had no significant cognitive impairment, and (e) were able to communicate with  
31 interviewers. Studies show that cancer patients may experience a steep decline in HRQoL  
32 during the last 3 months of life [44]. Therefore, we purposefully included only those with an  
33 expected survival time of at least 3 months. Those who could not understand the questions  
34 were excluded from the sample. Between June 2016 and July 2016, 328 patients met the  
35 inclusion criteria and were enrolled in the study.  
36  
37  
38  
39  
40  
41  
42  
43  
44  
45  
46  
47  
48  
49  
50  
51

52 Data collection was conducted by trained undergraduate students majoring in  
53 medicine and public health. Doctors and nurses in the inpatient unit of the department of  
54 chest-oncology medicine screened the eligible patients based on the inclusion and exclusion  
55 criteria, and researchers approached them and introduced the study. Those who agreed to  
56  
57  
58  
59  
60

## COPING, MOOD AND HRQOL IN LUNG CANCER PATIENTS

1  
2  
3 participate in the study provided informed consent. Face-to-face interviews were then  
4  
5 conducted. Disease and treatment information was extracted from medical records. The study  
6  
7 was approved by the Ethics Committee of Shanghai Chest Hospital, Shanghai Jiao Tong  
8  
9 University (No. KS1353). In accordance with our study aim, we focused on 267 patients with  
10  
11 advanced-stage lung cancer (stage III or IV), and the 261 participants who provided full  
12  
13 information on the main study variables (coping, mood, and HRQoL) were included in the  
14  
15 data analysis. A flow chart of the sample selection procedure is presented in supplementary  
16  
17 Figure 1.  
18  
19  
20  
21

## 22 2.2 Participant involvement

23  
24  
25 The participants were not involved in the design or recruitment process of this study.  
26  
27 However, the patients in department of oncology who worked with the 2<sup>nd</sup> author (an  
28  
29 oncologist) provided insights for the development of the research question. Permission to  
30  
31 conduct the study was obtained from relevant hospital authorities and participants.  
32  
33  
34

## 35 2.3 Measures

36  
37  
38 **2.3.1 Health-related quality of life.** The 5-level EuroQol 5-dimension (EQ-5D-5L)  
39  
40 was used to measure HRQoL in this study [45]. It contained five questions to assess five  
41  
42 health dimensions, as experienced in the recent days, namely mobility, self-care, usual  
43  
44 activities, pain/discomfort, and anxiety/depression. Respondents rated the severity on 5 levels  
45  
46 ranging from 1 (*no*) to 5 (*very severe*). In the current study, EQ-5D-5L domain scores and  
47  
48 overall utility index were calculated. Domain scores were recoded reversely based on the  
49  
50 original levels of each domain, with higher scores indicating better quality in the domain.  
51  
52 EQ-5D-5L utility index was calculated based on value sets developed by the EuroQol Group.  
53  
54 To our knowledge, no value sets have been developed in a Chinese representative sample for  
55  
56 the calculation of utility index, so in this study, utility index was calculated based on value  
57  
58  
59  
60

## COPING, MOOD AND HRQOL IN LUNG CANCER PATIENTS

sets weighted from a representative sample of the English general population [46]. The EQ-5D-5L utility index ranged from -1 to 1, with 1 representing full health, 0 representing a state of death, and negative values representing a state worse than death.

**2.3.2 Coping.** Two subscales of the Chinese version of the Medical Coping Modes Questionnaire (MCMQ) were used to measure confrontation and resigned acceptance coping strategies for lung cancer. MCMQ was developed by Feifel, Strack, and Nagy [15] among patients with a variety of life-threatening and chronic illnesses, and it is widely used for assessing coping strategies in patients in China [17, 47]. Acceptance-resignation subscale had five items, and confrontation subscale had nine items [15]. Sample items in acceptance-resignation subscale were as follows: “there is nothing you can do about your illness”, “you don’t care what happens to you”, and “feel there is really no hope for your recovery.” Sample items in confrontation subscale were as follows: “obtained information through books, magazines, and newspapers in the past several months”, “try to talk about your illness with friends or relatives”, “be involved in decisions regarding your treatment.” In addition to original confrontation subscale with eight items, we added one item assessing how often participants “obtained information through the Internet and new media in the past several months,” as the Internet and new media have become important sources of information that supplement books, magazines, and newspaper. All the items were rated on a 4-point Likert scale ranging from 1 (*never*) to 4 (*very often*). The mean score of each coping strategy was calculated, with a higher score indicating a higher probability of using that particular coping strategy. The Cronbach’s  $\alpha$  coefficients of confrontation and resigned acceptance in this study were 0.72 and 0.71, respectively.

**2.3.3 Mood.** Mood was measured using the Positive and Negative Affect Schedule (PANAS) [48]. The PANAS contained items to describe 10 positive affects (e.g., inspired, excited, determined) and 10 negative affects (e.g., afraid, upset, distressed). Respondents

## COPING, MOOD AND HRQOL IN LUNG CANCER PATIENTS

1  
2  
3 rated their experiences of each affect during the past two weeks on a 5-point Likert scale  
4  
5 ranging from 1 (*very slightly*) to 5 (*extremely*). The mean scores of items on the two  
6  
7 subscales were calculated for positive mood and negative mood, respectively. In the current  
8  
9 study, the Cronbach's  $\alpha$  coefficients of negative mood and positive mood were 0.91 and 0.86,  
10  
11 respectively.  
12  
13

14  
15 **2.3.4 Covariates.** Sociodemographic factors included age, gender, education  
16  
17 (elementary school or lower, middle school, high school, college or higher), and marital  
18  
19 status (married, single, divorced, widowed). Perceived cancer-related financial burden was  
20  
21 assessed by the question, "Have your disease and treatment caused you and your family  
22  
23 financial difficulty?" and participants answered on a 5-point scale ranging from 0 (*No*) to 4  
24  
25 (*Very much*). Clinical factors included time of diagnosis, cancer stage, lung cancer type  
26  
27 (adenocarcinoma, squamous, poorly differentiated, small cell, not otherwise specified), and  
28  
29 treatment history (surgery, chemotherapy, radiotherapy, targeted therapy).  
30  
31  
32

## 33 34 35 **2.4 Data Analysis**

36  
37 First, descriptive statistics were presented for sociodemographic and clinical  
38  
39 characteristics, and main study variables. Mean and standard deviation, or frequency and  
40  
41 percentage, were computed for continuous and categorical variables, respectively.  
42  
43 Independent *t* test, analysis of variance, and post-hoc comparison were conducted to analyze  
44  
45 the effect of sociodemographic and clinical factors on positive mood, negative mood, and  
46  
47 HRQoL (see supplementary Table 1). Correlational analyses were performed to examine the  
48  
49 associations between the continuous variables.  
50  
51  
52

53  
54 Secondly, hierarchical, multiple, linear regression analyses were employed to  
55  
56 examine the relationships among coping, mood, and HRQoL. The hierarchical regressions  
57  
58 with HRQoL (domain scores and EQ-5D utility index) as a dependent variable involved three  
59  
60

## COPING, MOOD AND HRQOL IN LUNG CANCER PATIENTS

1  
2  
3 steps: In step one, gender, age, cancer stage, and covariates that were significantly correlated  
4 with mood and HRQoL (i.e., financial burden, lung cancer type, a history of radiotherapy)  
5 were entered; In step two, confrontation and resigned acceptance were entered; In step three,  
6 positive and negative mood were entered.  
7  
8  
9  
10  
11  
12

13 Thirdly, the mediating effects of positive and negative mood in the relationship  
14 between coping and HRQoL were tested using the *MEDIATE* macro for SPSS developed by  
15 Preacher and Hayes [49]. Bootstrapping techniques using 5000 samples were used for the  
16 analysis, which was regarded as providing a more reliable estimate for the small sample size.  
17 Significant indirect effect was indicated by a 95% confidence interval of indirect effect  
18 without including zero. Power analyses indicated that in a model with two parallel mediators,  
19 a sample of 260 has 80% power to detect a 95% confidence interval of indirect effect,  
20 assuming correlations of  $r = 0.20$  between independent variable, the dependent variable, and  
21 the mediators. Schoemann, Boulton, and Short suggest that this power analytic method is an  
22 appropriate approach for determining power and sample size in mediation models [50]. All  
23 tests were two tailed, and a  $p$ -value of  $<0.05$  was considered statistically significant.  
24  
25  
26  
27  
28  
29  
30  
31  
32  
33  
34  
35  
36  
37  
38

### 3. Results

#### 3.1 Sociodemographic and Clinical Characteristics

39  
40  
41  
42  
43  
44  
45 The sociodemographic and clinical characteristics for the samples are shown in Table  
46  
47 1. A total sample of 261 participants had a mean age of 59.99 years ( $SD = 9.53$ ). Males  
48 represented 70.1% of the samples. Most participants were married (94.6%) and perceived a  
49 slight to very severe cancer-related financial burden (85.8%). More than half of the  
50 participants had been diagnosed in the past 6 months (55.2%). More than 90% of the  
51 participants had ever received chemotherapy (96.6%), whereas a certain proportion had ever  
52 received surgery (23.4%), radiotherapy (23.4%), or targeted therapy (14.6%).  
53  
54  
55  
56  
57  
58  
59  
60

## COPING, MOOD AND HRQOL IN LUNG CANCER PATIENTS

Table 1 Sample Characteristics

| <b>Variables</b>                                 | <b>M(SD) / n (%)</b> |
|--------------------------------------------------|----------------------|
| <b>Age (years)</b>                               | 59.99 (9.53)         |
| <b>Gender</b>                                    |                      |
| Male                                             | 183 (70.1%)          |
| Female                                           | 78 (29.9%)           |
| <b>Education</b>                                 |                      |
| Elementary school or lower                       | 55 (21.1%)           |
| Middle school                                    | 91 (34.9%)           |
| High school                                      | 66 (25.3%)           |
| College or higher                                | 49 (18.8%)           |
| <b>Marital status</b>                            |                      |
| Married                                          | 247 (94.6%)          |
| Single/divorced/ widowed                         | 14 (5.4%)            |
| <b>Perceived cancer-related financial burden</b> |                      |
| None                                             | 37 (14.2%)           |
| Slight                                           | 100 (38.3%)          |
| Moderate                                         | 63 (24.1%)           |
| Severe                                           | 36 (13.8%)           |
| Very Severe                                      | 25 (9.6%)            |
| <b>Time since diagnosis <sup>a</sup></b>         |                      |
| Less than 6 months                               | 144 (55.2%)          |
| 6-12months                                       | 32 (12.3%)           |
| 12-24 months                                     | 31 (11.9%)           |
| More than 24 months                              | 46 (17.6%)           |
| <b>Stage</b>                                     |                      |
| III                                              | 82 (31.4%)           |
| IV                                               | 179 (68.6%)          |
| <b>Lung cancer type <sup>b</sup></b>             |                      |
| NSC - Adenocarcinoma                             | 140 (53.6%)          |
| NSC - Squamous                                   | 47 (18.0%)           |



## COPING, MOOD AND HRQOL IN LUNG CANCER PATIENTS

|                             |             |
|-----------------------------|-------------|
| NSC - Poorly differentiated | 24 (9.2%)   |
| NSC - Others                | 7 (2.7%)    |
| Small cell                  | 43 (16.5%)  |
| <b>Treatment history</b>    |             |
| Received surgery            |             |
| Yes                         | 61 (23.4%)  |
| No                          | 200 (76.6%) |
| Received chemotherapy       |             |
| Yes                         | 252 (96.6%) |
| No                          | 9 (3.4%)    |
| Received radiotherapy       |             |
| Yes                         | 61 (23.4%)  |
| No                          | 200 (76.6%) |
| Received targeted therapy   |             |
| Yes                         | 38 (14.6%)  |
| No                          | 223 (85.4%) |

*Note.* a. For time since diagnosis, the sum of number is not 261 due to missing data; b. NSC:

Non-small cell.

### 3.2 Coping, Mood, and HRQoL

Pearson correlation analysis was performed to examine the relationships between coping, mood, and HRQoL (see Table 2). A small and positive correlation was observed between confrontation coping and positive mood ( $r = 0.21$ ). Resigned acceptance was moderately and positively correlated with negative mood ( $r = 0.46$ ), but moderately and inversely correlated with positive mood ( $r = -0.27$ ). Use of resigned acceptance was correlated with more difficulties in mobility ( $r = -0.21$ ), self-care ( $r = -0.19$ ), usual activities ( $r = -0.19$ ), pain/discomfort ( $r = -0.19$ ), anxiety/depression ( $r = -0.41$ ), and lower EQ-5D utility index ( $r = -0.28$ ).

COPING, MOOD AND HRQOL IN LUNG CANCER PATIENTS

Table 2 Correlation among coping, affect and HRQOL

|                                | M (SD)      | 1      | 2       | 3      | 4       | 5      | 6      | 7      | 8      | 9      |
|--------------------------------|-------------|--------|---------|--------|---------|--------|--------|--------|--------|--------|
| <b>1. Confrontation</b>        | 2.37 (0.49) | 1      |         |        |         |        |        |        |        |        |
| <b>2. Resigned acceptance</b>  | 1.92 (0.62) | -0.03  | 1       |        |         |        |        |        |        |        |
| <b>3. Positive mood</b>        | 2.40 (0.76) | 0.21** | -0.27** | 1      |         |        |        |        |        |        |
| <b>4. Negative mood</b>        | 1.84 (0.76) | 0.11   | 0.46**  | -0.11  | 1       |        |        |        |        |        |
| <b>5. Mobility</b>             | 4.32 (0.99) | -0.05  | -0.21** | 0.19** | -0.28** | 1      |        |        |        |        |
| <b>6. Self-care</b>            | 4.58 (0.86) | -0.06  | -0.19** | 0.15*  | -0.28** | 0.78** | 1      |        |        |        |
| <b>7. Usual activities</b>     | 4.24 (0.97) | -0.10  | -0.19** | 0.16*  | -0.27** | 0.78** | 0.73** | 1      |        |        |
| <b>8. Pain/discomfort</b>      | 3.98 (0.87) | -0.08  | -0.19** | 0.14*  | -0.28** | 0.45** | 0.43** | 0.46** | 1      |        |
| <b>9. Anxiety/depression</b>   | 4.22 (0.73) | -0.03  | -0.41** | 0.19** | -0.50** | 0.21** | 0.21** | 0.25** | 0.27** | 1      |
| <b>10. EQ-5D utility index</b> | 0.80 (0.19) | -0.10  | -0.28** | 0.20** | -0.38** | 0.84** | 0.82** | 0.84** | 0.69** | 0.45** |

\*p<0.05, \*\*p<0.01

Scale range: Confrontation, resigned acceptance: 1 (never) – 4 (very often); Positive mood, negative mood: 1 (very slightly) – 5 (extremely); Mobility, self-care, usual activities, pain/discomfort, anxiety/depression: 1 (very severe) – 5 (no); EQ-5D utility index: -1 (worse than death) – 1 (full health)

## COPING, MOOD AND HRQOL IN LUNG CANCER PATIENTS

Hierarchical regression analyses were used to examine the relationship of confrontation and resigned acceptance coping with positive mood, negative mood, and HRQoL (see Table 3). Age, gender, cancer stage, and significant correlates of mood and/or HRQoL ( $p < 0.05$ ), including perceived cancer-related financial burden, a history of radiotherapy, and lung cancer type (poorly differentiated non-small cell, small cell, other non-small cell), were controlled in the hierarchical regression analyses. Regarding positive mood, in addition to covariates, confrontation and resigned acceptance were found to be significant factors, as confrontation was associated with higher positive mood ( $\beta = 0.19, p = 0.002$ ), whereas resigned acceptance was associated with lower positive mood ( $\beta = -0.25, p < 0.001$ ). Regarding negative mood, in addition to covariates, confrontation and resigned acceptance were significant factors, as use of confrontation ( $\beta = 0.11, p = 0.040$ ) and resigned acceptance ( $\beta = 0.44, p < 0.001$ ) were associated with higher negative mood.

Regarding the EQ-5D domain scores, after controlling sociodemographic and clinical covariates, confrontation was not associated with the domain scores, whereas resigned acceptance was inversely associated with all domains. Positive mood was associated with less difficulty in mobility, usual activities, pain/discomfort, but not associated with self-care and anxiety/depression. Negative mood was associated with more difficulty in all domains of HRQOL.

Regarding EQ-5D utility index, after controlling sociodemographic and clinical covariates, resigned acceptance was inversely associated with EQ-5D utility index ( $\beta = -0.22, p < 0.001$ ), whereas confrontation was not associated with EQ-5D utility index. Moreover, the effects of mood on EQ-5D utility index were significant, as positive mood was associated with higher EQ-5D utility index ( $\beta = 0.17, p = 0.005$ ), whereas negative mood was associated with lower EQ-5D utility index ( $\beta = -0.28, p < 0.001$ ).

## COPING, MOOD AND HRQOL IN LUNG CANCER PATIENTS

Table 3 Multiple regression results for predictors of mood and HRQOL

|                                                     | Positive mood |              | Negative mood |                  | Mobility  |              | Self-care |              | Usual activities |              | Pain / discomfort |              | Anxiety / depression |                  | EQ-5D utility index |              |
|-----------------------------------------------------|---------------|--------------|---------------|------------------|-----------|--------------|-----------|--------------|------------------|--------------|-------------------|--------------|----------------------|------------------|---------------------|--------------|
|                                                     | $\beta^f$     | <i>p</i>     | $\beta^f$     | <i>p</i>         | $\beta^f$ | <i>p</i>     | $\beta^f$ | <i>p</i>     | $\beta^f$        | <i>p</i>     | $\beta^f$         | <i>p</i>     | $\beta^f$            | <i>p</i>         | $\beta^f$           | <i>p</i>     |
| <b>Step 1</b>                                       |               |              |               |                  |           |              |           |              |                  |              |                   |              |                      |                  |                     |              |
| <b>Age</b>                                          | -0.15         | <b>0.021</b> | -0.04         | 0.53             | -0.13     | <b>0.040</b> | -0.13     | <b>0.046</b> | -0.06            | 0.31         | -0.07             | 0.25         | 0.01                 | 0.91             | -0.10               | 0.09         |
| <b>Gender <sup>a</sup></b>                          | -0.07         | 0.32         | 0.05          | 0.40             | -0.07     | 0.29         | -0.06     | 0.35         | -0.09            | 0.15         | -0.01             | 0.85         | 0.02                 | 0.76             | -0.03               | 0.68         |
| <b>Financial burden <sup>b</sup></b>                | -0.14         | <b>0.032</b> | 0.30          | <b>&lt;0.001</b> | -0.16     | <b>0.010</b> | -0.15     | <b>0.017</b> | -0.20            | <b>0.002</b> | -0.15             | <b>0.018</b> | -0.25                | <b>&lt;0.001</b> | -0.22               | <b>0.001</b> |
| <b>Cancer stage <sup>c</sup></b>                    | -0.09         | 0.16         | -0.07         | 0.22             | 0.00      | 0.99         | 0.05      | 0.46         | 0.03             | 0.67         | 0.04              | 0.58         | 0.04                 | 0.51             | 0.04                | 0.53         |
| <b>Cancer type-other non-small cell (Reference)</b> | 0             |              | 0             |                  | 0         |              | 0         |              | 0                |              | 0                 |              | 0                    |                  | 0                   |              |
| <b>Cancer type-undifferentiated <sup>d</sup></b>    | 0.01          | 0.93         | -0.03         | 0.58             | -0.07     | 0.26         | -0.08     | 0.19         | -0.12            | 0.053        | -0.08             | 0.19         | -0.04                | 0.51             | -0.14               | <b>0.027</b> |
| <b>Cancer type-small cell <sup>d</sup></b>          | -0.08         | 0.21         | -0.01         | 0.85             | 0.05      | 0.44         | 0.03      | 0.66         | 0.08             | 0.22         | 0.14              | <b>0.025</b> | 0.07                 | 0.29             | 0.10                | 0.12         |
| <b>Received radiotherapy <sup>e</sup></b>           | -0.03         | 0.63         | 0.16          | <b>0.009</b>     | -0.17     | <b>0.006</b> | -0.19     | <b>0.003</b> | -0.14            | <b>0.026</b> | -0.20             | <b>0.002</b> | -0.07                | 0.24             | -0.20               | <b>0.001</b> |
| <b><math>\Delta R^2</math></b>                      | 0.054         |              | 0.141         |                  | 0.079     |              | 0.081     |              | 0.097            |              | 0.094             |              | 0.080                |                  | 0.124               |              |
| <b>Step 2</b>                                       |               |              |               |                  |           |              |           |              |                  |              |                   |              |                      |                  |                     |              |

## COPING, MOOD AND HRQOL IN LUNG CANCER PATIENTS

|                               |       |                  |       |                  |       |              |       |              |       |              |       |              |       |                  |       |                  |
|-------------------------------|-------|------------------|-------|------------------|-------|--------------|-------|--------------|-------|--------------|-------|--------------|-------|------------------|-------|------------------|
| <b>Confrontation</b>          | 0.19  | <b>0.002</b>     | 0.11  | <b>0.040</b>     | -0.05 | 0.40         | -0.05 | 0.39         | -0.07 | 0.25         | -0.07 | 0.29         | -0.01 | 0.81             | -0.08 | 0.17             |
| <b>Resigned acceptance</b>    | -0.25 | <b>&lt;0.001</b> | 0.44  | <b>&lt;0.001</b> | -0.16 | <b>0.013</b> | -0.15 | <b>0.019</b> | -0.16 | <b>0.012</b> | -0.14 | <b>0.029</b> | -0.41 | <b>&lt;0.001</b> | -0.22 | <b>&lt;0.001</b> |
| $\Delta R^2$                  | 0.098 |                  | 0.191 |                  | 0.025 |              | 0.023 |              | 0.027 |              | 0.021 |              | 0.155 |                  | 0.053 |                  |
| <b>Step 3</b>                 |       |                  |       |                  |       |              |       |              |       |              |       |              |       |                  |       |                  |
| <b>Positive mood</b>          |       |                  |       |                  | 0.16  | <b>0.013</b> | 0.12  | 0.078        | 0.14  | <b>0.026</b> | 0.14  | <b>0.029</b> | 0.10  | 0.076            | 0.17  | <b>0.005</b>     |
| <b>Negative mood</b>          |       |                  |       |                  | -0.22 | <b>0.003</b> | -0.20 | <b>0.006</b> | -0.17 | <b>0.020</b> | -0.20 | <b>0.005</b> | -0.36 | <b>&lt;0.001</b> | -0.28 | <b>&lt;0.001</b> |
| $\Delta R^2$                  |       |                  |       |                  | 0.053 |              | 0.039 |              | 0.036 |              | 0.044 |              | 0.093 |                  | 0.076 |                  |
| <b>Adjusted R<sup>2</sup></b> | 0.120 |                  | 0.307 |                  | 0.118 |              | 0.103 |              | 0.122 |              | 0.121 |              | 0.298 |                  | 0.218 |                  |

Note. a. 0=Male, 1=Female; b. range:1 (no difficulty) – 5 (very much); c. 1=stage III, 2=stage IV; d. other non-small cell lung cancers was the reference group; e. 0=No, 1=Yes; f. standardized coefficients

### 3.3 Mediating Effect of Mood on the Association between Coping and HRQoL

The MEDIANTE macro was used to examine the mediating effect of mood in the relationship between coping and HRQoL, controlling for age, gender, cancer stage, perceived cancer-related financial burden, history of radiotherapy, and lung cancer type (poorly differentiated non-small cell, small cell, other non-small cell). The indirect effect (ab) was estimated as the product of regression coefficients predicting mood from each coping strategy (a), and HRQoL from mood (b) (see Figure 1). Bootstrapping techniques using 5000 samples revealed significant indirect effects for confrontation and resigned acceptance on HRQoL through positive and negative mood, respectively. The results are presented in Table 4.

Although the total effects of confrontation on EQ-5D domains scores and utility index were not significant, competing indirect effects via mood were identified. On one hand, positive indirect effects were found for confrontation on mobility (point estimate = 0.06,  $SE = 0.03$ , 95% CI [0.01, 0.13]), usual activities (point estimate = 0.05,  $SE = 0.03$ , 95% CI [0.01, 0.12]), pain/discomfort (point estimate = 0.05,  $SE = 0.03$ , 95% CI [0.004, 0.11]), and overall utility index (point estimate = 0.01,  $SE = 0.01$ , 95% CI [0.003, 0.03]) through positive mood. On the other hand, negative indirect effects were found for confrontation on mobility (point estimate = -0.05,  $SE = 0.03$ , 95% CI [-0.12, -0.002]), pain/discomfort (point estimate = -0.04,  $SE = 0.02$ , 95% CI [-0.10, -0.001]), anxiety/depression (point estimate = -0.06,  $SE = 0.03$ , 95% CI [-0.13, -0.003]), and overall utility index (point estimate = -0.01,  $SE = 0.01$ , 95% CI [-0.03, -0.001]) through negative mood. The direct effects of confrontation on EQ-5D domains scores and utility index were not significant.

Resigned acceptance has a significant negative total effect on EQ-5D domains scores and utility index. Furthermore, indirect effects of resigned acceptance on HRQoL via positive and negative mood were identified. Use of resigned acceptance was associated with decrease

## COPING, MOOD AND HRQOL IN LUNG CANCER PATIENTS

1  
2  
3 in positive mood, and increase in negative mood, which could lead to more difficulty in  
4  
5 mobility, self-care, usual activities, pain/discomfort, anxiety/depression, and overall utility  
6  
7 index (indirect effect via positive mood: point estimate = -0.01, *SE* = 0.01, 95% CI [-0.03, -  
8  
9 0.003]; indirect effect via negative mood: point estimate = -0.04, *SE* = 0.01, 95% CI [-0.06, -  
10  
11 0.02]).  
12  
13  
14  
15  
16  
17  
18  
19  
20  
21  
22  
23  
24  
25  
26  
27  
28  
29  
30  
31  
32  
33  
34  
35  
36  
37  
38  
39  
40  
41  
42  
43  
44  
45  
46  
47  
48  
49  
50  
51  
52  
53  
54  
55  
56  
57  
58  
59  
60

For peer review only



## COPING, MOOD AND HRQOL IN LUNG CANCER PATIENTS

Table 4 Mediation model testing the direct and indirect effect of coping on HRQOL via mood

| Outcome          | Predictor           | Mediator      | Path a          | Path b          | Path ab: indirect effect of coping on HRQOL |                 | Path c': Direct effect of coping on HRQOL | Path c: Total effect of coping on HRQOL |
|------------------|---------------------|---------------|-----------------|-----------------|---------------------------------------------|-----------------|-------------------------------------------|-----------------------------------------|
|                  |                     |               | coef (se)       | coef (se)       | coef (se)                                   | 95% CI          | coef (se)                                 | coef (se)                               |
| HRQOL            | Confrontation       | Positive mood | 0.30** (0.09)   | 0.04** (0.01)   | 0.01 (0.01)                                 | [0.003, 0.03]   | -0.03 (0.02)                              | -0.03 (0.02)                            |
|                  |                     | Negative mood | 0.17* (0.08)    | -0.07*** (0.02) | -0.01 (0.01)                                | [-0.03, -0.001] |                                           |                                         |
|                  | Resigned acceptance | Positive mood | -0.31*** (0.08) |                 | -0.01 (0.01)                                | [-0.03, -0.003] | -0.02 (0.02)                              | -0.07*** (0.02)                         |
|                  |                     | Negative mood | 0.54*** (0.07)  |                 | -0.04 (0.01)                                | [-0.06, -0.02]  |                                           |                                         |
| Mobility         | Confrontation       | Positive mood | 0.30** (0.09)   | 0.21* (0.08)    | 0.06 (0.03)                                 | [0.01, 0.13]    | -0.12 (0.13)                              | -0.10 (0.12)                            |
|                  |                     | Negative mood | 0.17* (0.08)    | -0.28** (0.09)  | -0.05 (0.03)                                | [-0.12, -0.002] |                                           |                                         |
|                  | Resigned acceptance | Positive mood | -0.31*** (0.08) |                 | -0.06 (0.03)                                | [-0.13, -0.01]  | -0.03 (0.11)                              | -0.25* (0.10)                           |
|                  |                     | Negative mood | 0.54*** (0.07)  |                 | -0.15 (0.06)                                | [-0.27, -0.05]  |                                           |                                         |
| Self-care        | Confrontation       | Positive mood | 0.30** (0.09)   | 0.13 (0.07)     | 0.04 (0.03)                                 | [-0.003, 0.10]  | -0.09 (0.11)                              | -0.09 (0.11)                            |
|                  |                     | Negative mood | 0.17* (0.08)    | -0.23** (0.08)  | -0.04 (0.03)                                | [-0.10, 0.002]  |                                           |                                         |
|                  | Resigned acceptance | Positive mood | -0.31*** (0.08) |                 | -0.04 (0.03)                                | [-0.10, -0.003] | -0.04 (0.10)                              | -0.21* (0.09)                           |
|                  |                     | Negative mood | 0.54*** (0.07)  |                 | -0.14 (0.05)                                | [-0.24, -0.05]  |                                           |                                         |
| Usual Activities | Confrontation       | Positive mood | 0.30** (0.09)   | 0.18* (0.08)    | 0.05 (0.03)                                 | [0.01, 0.12]    | -0.16 (0.12)                              | -0.14 (0.12)                            |
|                  |                     | Negative mood | 0.17* (0.08)    | -0.22* (0.09)   | -0.04 (0.02)                                | [-0.09, 0.001]  |                                           |                                         |
|                  | Resigned acceptance | Positive mood | -0.31*** (0.08) |                 | -0.06 (0.03)                                | [-0.12, -0.01]  | -0.07 (0.11)                              | -0.25* (0.10)                           |
|                  |                     | Negative mood | 0.54*** (0.07)  |                 | -0.12 (0.05)                                | [-0.22, -0.02]  |                                           |                                         |

## COPING, MOOD AND HRQOL IN LUNG CANCER PATIENTS

|                                 |                        |                 |                 |                 |                |                 |                 |               |
|---------------------------------|------------------------|-----------------|-----------------|-----------------|----------------|-----------------|-----------------|---------------|
| <b>Pain /<br/>Discomfort</b>    | Confrontation          | Positive mood   | 0.30** (0.09)   | 0.16* (0.07)    | 0.05 (0.03)    | [0.004, 0.11]   | -0.12 (0.11)    | -0.12 (0.11)  |
|                                 |                        | Negative mood   | 0.17* (0.08)    | -0.23** (0.08)  | -0.04 (0.02)   | [-0.10, -0.001] |                 |               |
| <b>Anxiety /<br/>Depression</b> | Resigned<br>acceptance | Positive mood   | -0.31*** (0.08) |                 | -0.05 (0.03)   | [-0.11, -0.005] | -0.02 (0.10)    | -0.19* (0.09) |
|                                 |                        | Negative mood   | 0.54*** (0.07)  |                 | -0.13 (0.05)   | [-0.23, -0.04]  |                 |               |
|                                 | Confrontation          | Positive mood   | 0.30** (0.09)   | 0.10 (0.05)     | 0.03 (0.02)    | [-0.003, 0.74]  | 0.01 (0.08)     | -0.02 (0.08)  |
|                                 |                        | Negative mood   | 0.17* (0.08)    | -0.34*** (0.06) | -0.06 (0.03)   | [-0.13, -0.003] |                 |               |
| Resigned<br>acceptance          | Positive mood          | -0.31*** (0.08) |                 | -0.03 (0.02)    | [-0.07, 0.003] | -0.26** (0.07)  | -0.48*** (0.07) |               |
|                                 | Negative mood          | 0.54*** (0.07)  |                 | -0.18 (0.04)    | [-0.27, -0.11] |                 |                 |               |

Note. Age, gender, financial burden, disease stage, lung cancer type, and history of radiotherapy were controlled in the mediation model. All coefficients (a, b, c', c) were unstandardized coefficients. \* $p < 0.05$ , \*\* $p < 0.01$ , \*\*\*  $p < 0.001$

#### 4. Discussion

To our knowledge, this is the first study to examine the relationship between coping, positive and negative mood, and HRQoL and the mediating role of mood in the relationship between coping and HRQoL among patients with advanced cancer. The findings of this study indicate that examining the pathway via positive and negative mood can generate a new understanding of the effect of coping on HRQoL among patients with advanced lung cancer, regardless of sociodemographic and clinical factors. The confrontation coping strategy was not directly associated with domains of HRQoL or overall HRQoL, but two significant indirect pathways via mood were identified. On one hand, confrontation had positive indirect effects on mobility, usual activities, pain, and overall HRQoL via positive mood; On the other hand, confrontation had negative indirect effects on mobility, pain, anxiety, and overall HRQoL via negative mood; Positive and negative indirect effect could counteract, resulting in a nonsignificant total effect. In contrast, use of resigned acceptance coping was associated with an increase in negative mood and a decrease in positive mood, which could in turn result in more difficulty in mobility, self-care, usual activities, pain, and poor overall HRQoL. On the whole, this is a unique finding that indicates the ambivalence of confrontation and the maladaptive nature of resigned acceptance among patients with advanced lung cancer.

The mean EQ-5D utility index in the current study was found to be 0.80, which was comparable to a study among patients with advanced non-small cell lung cancer in China with a utility index of 0.81 [51]. Consistent with previous studies, patients perceiving higher financial burden were more likely to report poor HRQoL compared to those perceiving lower financial burden related to cancer [11, 52]. Financial burden may restrict access to some drugs and treatment [52], and it may also lead to a sense of guilt for relying on families [29], which may affect health outcomes.

## COPING, MOOD AND HRQOL IN LUNG CANCER PATIENTS

1  
2  
3 The current findings support the theory of stress and coping in the context of  
4 advanced cancer by indicating that coping can play a role in adapting to the experience of  
5 lung cancer, which could in turn influence emotional and health outcomes [36, 37]. The  
6 current study is in line with previous studies indicating that resigned acceptance was  
7 associated with less favorable outcomes [21, 26]. Resigned acceptance is related to the  
8 fatalistic attitude toward illness in traditional Taoist beliefs [28]. Giving up control in the  
9 actual situation, or even other aspects of life and holding negative expectations about the  
10 future could be associated with low levels of positive mood, and increase negative mood,  
11 which contribute to poor health outcomes in patients with advanced cancer. Moreover, it  
12 should be noted that PANAS mainly measured the high-activated affect [53]. It is possible  
13 that giving up attempt and hope may induce high-activated negative mood (e.g., distressed,  
14 scared, ashamed), rather than the high-activated positive mood (e.g., active, alert, interested).  
15 However, further study is suggested to investigate the relationship between resigned  
16 acceptance and low-activated mood, for instance, if low-activated positive mood (e.g., peace,  
17 calm) may emerge by accepting the advanced cancer despite in a passive way.  
18  
19  
20  
21  
22  
23  
24  
25  
26  
27  
28  
29  
30  
31  
32  
33  
34  
35  
36  
37

38 Confrontation was found to be associated with increased positive and negative mood.  
39 In the current study, confrontation was characterized by attempts such as seeking information  
40 and support from various sources and being involved in decision making. Through such  
41 efforts, patients may regain a sense of control and redirect energy to constructive actions  
42 during treatment and daily living, which might facilitate the occurrence of positive mood.  
43 However, it is also possible that individuals could encounter various stressful decisions and  
44 pieces of information when they actively confront the advanced disease, which might lead to  
45 negative mood.  
46  
47  
48  
49  
50  
51  
52  
53  
54  
55  
56

57 Our findings are in line with other studies reporting a nonsignificant association  
58 between confrontation and HRQoL among cancer patients [14, 21, 22]. Particularly, the  
59  
60

## COPING, MOOD AND HRQOL IN LUNG CANCER PATIENTS

1  
2  
3 findings on the mediating role of mood can help clarify the mechanisms underlying the  
4  
5 nonsignificant association. The coexisting positive and negative indirect effect via mood  
6  
7 could counteract one another, resulting in a null, or weak, total effect of confrontation on  
8  
9 HRQoL. The ambivalence of confrontation may also reflect the effect of fighting attitude  
10  
11 towards life-threatening illness in Chinese population, in which the patients and their families  
12  
13 would seek, try, and continue available curative treatments to sustain and prolong life. Even  
14  
15 though actively confronting the advanced cancer may have some benefits (e.g., sense of  
16  
17 control, constructive actions and skills), it may also remind patients of the potential incurable  
18  
19 nature of advanced cancer and increase distress.  
20  
21  
22  
23

24  
25 This study indicated that mood can be a pathway between coping and health  
26  
27 outcomes. One explanation is related to physiology of mood [54], as positive and negative  
28  
29 mood are associated with physiological levels in different directions, which can lead to  
30  
31 different health outcomes. The second explanation is related to thought-action repertoires  
32  
33 [43]. Negative mood is suggested to narrow the thought-action repertoires and increase  
34  
35 unhealthy lifestyle and social isolation [43, 55], which could result in poor health outcomes.  
36  
37 In contrast, positive affect is suggested to broaden the scope of attention and thought-action  
38  
39 repertoires and build up personal and social resources [43], which could be beneficial to  
40  
41 health outcomes. The third explanation is related to attributional interpretation [33]. HRQoL  
42  
43 refers to a self-perceived health status, and it is possible that participants in a negative mood  
44  
45 tend to perceive lower health status (more difficulties in daily living and symptoms) than  
46  
47 those in a positive mood.  
48  
49  
50  
51

52  
53 This study has some limitations. First, causality on the relationships between coping,  
54  
55 mood, and HRQoL could not be drawn out from this cross-sectional study. Secondly,  
56  
57 although Medical Coping Modes Questionnaire measured three coping strategies (i.e.,  
58  
59 confrontation, acceptance-resignation, avoidance), reliability of avoidance, indicated by  
60

## COPING, MOOD AND HRQOL IN LUNG CANCER PATIENTS

1  
2  
3 Cronbach'  $\alpha$  coefficient, was low in the current study. This restricted us from analyzing the  
4 effect of the avoidance strategy. Thirdly, although EuroQol 5-dimension was used to measure  
5 HRQoL among patients with advanced cancer in a range of studies [51, 56], the measurement  
6 properties of the instrument is needed to be examined further in patients with advanced  
7 cancer [57]. Fourthly, the sample was recruited from one hospital in China, which could  
8 compromise the generalizability of the findings.  
9  
10  
11  
12  
13  
14  
15  
16  
17

18         Considering the effect of coping strategies, the findings of our study suggest specific  
19 attention to resigned acceptance among patients with advanced cancer. Despite patients  
20 accepting the reality of advanced disease, practitioners may help them to regain a sense of  
21 control and develop constructive responses. Acceptance-based interventions, such as  
22 Acceptance and Commitment Therapy, may be a worthwhile approach, which are suggested  
23 to reduce emotional distress and improve quality of life by facilitating the active acceptance  
24 of unpleasant thoughts and feelings in cancer patients [58, 59]. Resigned acceptance is  
25 associated with a variety of negative feelings such as fear and distressed. Support from family  
26 and a positive environment is suggested to relieve the fears and fatalistic attitude [60, 61].  
27 Additionally, the associations of confrontation with both positive and negative mood  
28 indicates the need to consider this ambivalent emotional experience among patients who  
29 actively confront the advanced cancer. Being actively to deal with the stressors during the  
30 illness trajectory may enhance the positive mood, but practitioners is suggested to pay  
31 attention to the excessive information- or treatment-seeking behaviors, and help relieve  
32 anxiety and fear among patients. Finally, when implementing interventions for the  
33 improvement of HRQoL, we suggest that practitioners consider the role of both positive and  
34 negative mood, which could serve as pathways between coping and HRQoL among patients  
35 with advanced lung cancer. Early palliative care may be integrated into standard oncology  
36  
37  
38  
39  
40  
41  
42  
43  
44  
45  
46  
47  
48  
49  
50  
51  
52  
53  
54  
55  
56  
57  
58  
59  
60

## COPING, MOOD AND HRQOL IN LUNG CANCER PATIENTS

care, which is suggested to facilitate adaptive coping, reduce emotional distress, and improve quality of life in patients with advanced cancer [62].

**Figure 1** Positive and negative mood as mediators of the association between coping and HRQoL

### Acknowledgements

The authors thank all the participants for their involvement, and all healthcare workers for their kind support in the study.

### Contributors

HY, JH, LV, CJ designed the study. HY, JH, YM, ZJ, and LG collected data. HY and CJ analyzed the data. HY and CJ drafted the manuscript. HY, JH, YM, ZJ, LG, LV, CJ revised the manuscript.

### Funding

The study is supported by Shanghai Municipal Health Bureau Foundation (No. 201740116), National Natural Science Foundation of China (No. 71874111), School of Medicine of Shanghai Jiao Tong University Core Education Project (No. ZD150603), The Fourth Round of Three-year Action Plan on Public Health Discipline and Talent Program: Evidence-based Public Health and Health Economics (No.15GWZK0901)

### Competing interests

The authors declare that they have no conflict of interest.

### Patient consent

Obtained.

### Data sharing statement

## COPING, MOOD AND HRQOL IN LUNG CANCER PATIENTS

No additional data were available.

## References

1. Chen WQ, Zheng RS, Baade PD et al. Cancer Statistics in China, 2015. *Ca-a Cancer Journal for Clinicians* 2016; 66: 115-132.
2. Stewart B, Wild CP. World cancer report 2014. Health 2017.
3. Ma YX, Yang YP, Huang Y et al. An investigation of symptom burden and quality of life in Chinese chemo-naïve advanced lung cancer patients by using the Instrument-Cloud QOL System. *Lung Cancer* 2014; 84: 301-306.
4. Schmidt K, Damm K, Prenzler A et al. Preferences of lung cancer patients for treatment and decision-making: a systematic literature review. *European Journal of Cancer Care* 2016; 25: 580-591.
5. Huang H-Y, Shi J-F, Guo L-W et al. Expenditure and financial burden for common cancers in China: a hospital-based multicentre cross-sectional study. *The Lancet* 2016; 388: S10.
6. Chouaid C, Agulnik J, Goker E et al. Health-Related Quality of Life and Utility in Patients with Advanced Non-Small-Cell Lung Cancer: A Prospective Cross-Sectional Patient Survey in a Real-World Setting. *Journal of Thoracic Oncology* 2013; 8: 997-1003.
7. Zeng HM, Zheng RS, Guo YM et al. Cancer survival in China, 2003-2005: A population-based study. *International Journal of Cancer* 2015; 136: 1921-1930.
8. Gupta D, Braun DP, Staren ED. Association between changes in quality of life scores and survival in non-small cell lung cancer patients. *European Journal of Cancer Care* 2012; 21: 614-622.
9. Maione P, Perrone F, Gallo C et al. Pretreatment quality of life and functional status assessment significantly predict survival of elderly patients with advanced non-small-cell lung cancer receiving chemotherapy: A prognostic analysis of the Multicenter Italian Lung Cancer in the Elderly Study. *Journal of Clinical Oncology* 2005; 23: 6865-6872.
10. Polanski J, Jankowska-Polanska B, Rosinczuk J et al. Quality of life of patients with lung cancer. *Oncotargets and Therapy* 2016; 9: 1023-1028.
11. Chen JE, Lou VW, Jian H et al. Objective and subjective financial burden and its associations with health-related quality of life among lung cancer patients. *Supportive Care in Cancer* 2018; 26: 1265-1272.
12. Mosher CE, Ott MA, Hanna N et al. Coping with physical and psychological symptoms: a qualitative study of advanced lung cancer patients and their family caregivers. *Supportive Care in Cancer* 2015; 23: 2053-2060.
13. Nipp RD, Greer JA, El-Jawahri A et al. Coping and Prognostic Awareness in Patients With Advanced Cancer. *Journal of Clinical Oncology* 2017; 35: 2551-+.
14. Nipp RD, El-Jawahri A, Fishbein JN et al. The relationship between coping strategies, quality of life, and mood in patients with incurable cancer. *Cancer* 2016; 122: 2110-2116.
15. Feifel H, Strack S, Nagy VT. Coping strategies and associated features of medically ill patients. *Psychosomatic Medicine* 1987; 49: 616-625.
16. Ma YM, Ba CF, Wang YB. Analysis of factors affecting the life quality of the patients with late stomach cancer. *Journal of Clinical Nursing* 2014; 23: 1257-1262.



## COPING, MOOD AND HRQOL IN LUNG CANCER PATIENTS

17. Wu XD, Qin HY, Zhang JE et al. The prevalence and correlates of symptom distress and quality of life in Chinese oesophageal cancer patients undergoing chemotherapy after radical oesophagectomy. *European Journal of Oncology Nursing* 2015; 19: 502-508.
18. Hong JF, Wei ZZ, Wang WL. Preoperative psychological distress, coping and quality of life in Chinese patients with newly diagnosed gastric cancer. *Journal of Clinical Nursing* 2015; 24: 2439-2447.
19. van Laarhoven HWM, Schilderman J, Bleijenberg G et al. Coping, Quality of Life, Depression, and Hopelessness in Cancer Patients in a Curative and Palliative, End-of-Life Care Setting. *Cancer Nursing* 2011; 34: 302-314.
20. Sorato DB, Osorio FL. Coping, psychopathology, and quality of life in cancer patients under palliative care. *Palliative & Supportive Care* 2015; 13: 517-525.
21. Xu L, Pan QO, Lin RQ. Prevalence rate and influencing factors of preoperative anxiety and depression in gastric cancer patients in China: Preliminary study. *Journal of International Medical Research* 2016; 44: 377-388.
22. He GP, Liu S. Quality of life and coping styles in Chinese nasopharyngeal cancer patients after hospitalization. *Cancer Nursing* 2005; 28: 179-186.
23. Nakamura YM, Orth U. Acceptance as a coping reaction: adaptive or not? *Swiss Journal of Psychology* 2005; 64: 281-292.
24. Feifel H, Strack S, Nagy VT. Degree of life-threat and differential use of coping modes. *Journal of Psychosomatic Research* 1987; 31: 91-99.
25. Hayes SC, Luoma JB, Bond FW et al. Acceptance and commitment therapy: Model, processes and outcomes. *Behaviour Research and Therapy* 2006; 44: 1-25.
26. Hack TF, Degner LF. Coping responses following breast cancer diagnosis predict psychological adjustment three years later. *Psycho-Oncology* 2004; 13: 235-247.
27. Yeung NCY, Lu Q. Affect mediates the association between mental adjustment styles and quality of life among Chinese cancer survivors. *Journal of Health Psychology* 2014; 19: 1420-1429.
28. Goss PE, Strasser-Weippl K, Lee-Bychkovsky BL et al. Challenges to effective cancer control in China, India, and Russia. *Lancet Oncology* 2014; 15: 489-538.
29. Chen H, Komaromy C, Valentine C. From hope to hope: The experience of older Chinese people with advanced cancer. *Health* 2015; 19: 154-171.
30. Bai Q, Zhang ZG, Lu XQ et al. Attitudes towards palliative care among patients and health professionals in Henan, China. *Progress in Palliative Care* 2010; 18: 341-345.
31. Park CL, Iacocca MO. A stress and coping perspective on health behaviors: theoretical and methodological considerations. *Anxiety, Stress, & Coping* 2014; 27: 123-137.
32. Drach-Zahavy A, Somech A. Coping with health problems: the distinctive relationships of Hope sub-scales with constructive thinking and resource allocation. *Personality and Individual Differences* 2002; 33: 103-117.
33. Billings DW, Folkman S, Acree M, Moskowitz JT. Coping and physical health during caregiving: The roles of positive and negative affect. *Journal of Personality and Social Psychology* 2000; 79: 131-142.
34. Katter JKQ, Greenglass E. The Influence of Mood on the Relation between Proactive Coping and Rehabilitation Outcomes. *Canadian Journal on Aging-Revue Canadienne Du Vieillessement* 2013; 32: 13-20.
35. Rueda B, Perez-Garcia AM. Coping strategies, depressive symptoms and quality of life in hypertensive patients: Mediatlional and prospective relations. *Psychology & Health* 2013; 28: 1152-1170.

## COPING, MOOD AND HRQOL IN LUNG CANCER PATIENTS

36. Folkman S, Greer S. Promoting psychological well-being in the face of serious illness: When theory, research and practice inform each other. *Psycho-Oncology* 2000; 9: 11-19.
37. Roberts D, Calman L, Large P et al. A revised model for coping with advanced cancer. Mapping concepts from a longitudinal qualitative study of patients and carers coping with advanced cancer onto Folkman and Greer's theoretical model of appraisal and coping. *Psycho-Oncology* 2018; 27: 229-235.
38. Hirsch JK, Floyd AR, Duberstein PR. Perceived health in lung cancer patients: the role of positive and negative affect. *Quality of Life Research* 2012; 21: 187-194.
39. Weitzner MA, Meyers CA, Stuebing KK, Saleeba AK. Relationship between quality of life and mood in long-term survivors of breast cancer treated with mastectomy. *Supportive Care in Cancer* 1997; 5: 241-248.
40. Stellar JE, John-Henderson N, Anderson CL et al. Positive Affect and Markers of Inflammation: Discrete Positive Emotions Predict Lower Levels of Inflammatory Cytokines. *Emotion* 2015; 15: 129-133.
41. Messay B, Lim A, Marsland AL. Current understanding of the bi-directional relationship of major depression with inflammation. *Biology of Mood & Anxiety Disorders* 2012; 2.
42. Fredrickson BL. The broaden-and-build theory of positive emotions. *Philosophical Transactions of the Royal Society of London Series B-Biological Sciences* 2004; 359: 1367-1377.
43. Garland EL, Fredrickson B, Kring AM et al. Upward spirals of positive emotions counter downward spirals of negativity: Insights from the broaden-and-build theory and affective neuroscience on the treatment of emotion dysfunctions and deficits in psychopathology. *Clinical Psychology Review* 2010; 30: 849-864.
44. Raijmakers NJH, Zijlstra M, van Rooij J et al. Health-related quality of life among cancer patients in their last year of life: results from the PROFILES registry. *Supportive Care in Cancer* 2018.
45. Luo N, Li MH, Liu GG et al. Developing the Chinese version of the new 5-level EQ-5D descriptive system: the response scaling approach. *Quality of Life Research* 2013; 22: 885-890.
46. Feng Y, Devlin N, Shah K et al. New methods for modelling EQ-5D-5L value sets: an application to English data. 2016.
47. Deng MH, Lan YH, Luo SL. Quality of life estimate in stomach, colon, and rectal cancer patients in a hospital in China. *Tumor Biology* 2013; 34: 2809-2815.
48. Watson D, Clark LA, Tellegen A. Development and validation of brief measures of positive and negative affect-The PANAS scales. *Journal of Personality and Social Psychology* 1988; 54: 1063-1070.
49. Preacher KJ, Hayes AF. Asymptotic and resampling strategies for assessing and comparing indirect effects in multiple mediator models. *Behavior research methods* 2008; 40: 879-891.
50. Schoemann AM, Boulton AJ, Short SD. Determining Power and Sample Size for Simple and Complex Mediation Models. *Social Psychological and Personality Science* 2017; 8: 379-386.
51. Shen YJ, Wu B, Wang XH, Zhu J. Health state utilities in patients with advanced non-small-cell lung cancer in China. *Journal of Comparative Effectiveness Research* 2018; 7: 443-452.

## COPING, MOOD AND HRQOL IN LUNG CANCER PATIENTS

- 1  
2  
3  
4  
5  
6  
7  
8  
9  
10  
11  
12  
13  
14  
15  
16  
17  
18  
19  
20  
21  
22  
23  
24  
25  
26  
27  
28  
29  
30  
31  
32  
33  
34  
35  
36  
37  
38  
39  
40  
41  
42  
43  
44  
45  
46  
47  
48  
49  
50  
51  
52  
53  
54  
55  
56  
57  
58  
59  
60
52. Perrone F, Jommi C, Di Maio M et al. The association of financial difficulties with clinical outcomes in cancer patients: secondary analysis of 16 academic prospective clinical trials conducted in Italy. *Annals of Oncology* 2016; 27: 2224-2229.
53. Russell JA. A circumplex model of affect. *Journal of Personality and Social Psychology* 1980; 39: 1161-1178.
54. Trudel-Fitzgerald C, Qureshi F, Appleton AA, Kubzansky LD. A healthy mix of emotions: underlying biological pathways linking emotions to physical health. *Current Opinion in Behavioral Sciences* 2017; 15: 16-21.
55. Walker MS, Larsen RJ, Zona DM et al. Smoking urges and relapse among lung cancer patients: findings from a preliminary retrospective study. *Preventive Medicine* 2004; 39: 449-457.
56. Chouaid C, Agulnik J, Goker E et al. Health-Related Quality of Life and Utility in Patients with Advanced Non-Small-Cell Lung Cancer: A Prospective Cross-Sectional Patient Survey in a Real-World Setting. *Journal of Thoracic Oncology* 2013; 8: 997-1003.
57. van Roij J, Fransen H, van de Poll-Franse L et al. Measuring health-related quality of life in patients with advanced cancer: a systematic review of self-administered measurement instruments. *Quality of Life Research* 2018; 27: 1937-1955.
58. Rost AD, Wilson K, Buchanan E et al. Improving Psychological Adjustment Among Late-Stage Ovarian Cancer Patients: Examining the Role of Avoidance in Treatment. *Cognitive and Behavioral Practice* 2012; 19: 508-517.
59. Feros DL, Lane L, Ciarrochi J, Blackledge JT. Acceptance and Commitment Therapy (ACT) for improving the lives of cancer patients: a preliminary study. *Psycho-Oncology* 2013; 22: 459-464.
60. Hamilton JB, Worthy VC, Moore AD et al. Messages of Hope: Helping Family Members to Overcome Fears and Fatalistic Attitudes Toward Cancer. *Journal of Cancer Education* 2017; 32: 190-197.
61. Gonzales FA, Hurtado-de-Mendoza A, Santoyo-Olsson J, Napoles AM. Do coping strategies mediate the effects of emotional support on emotional well-being among Spanish-speaking Latina breast cancer survivors? *Psycho-Oncology* 2016; 25: 1286-1292.
62. Greer JA, Jacobs JM, El-Jawahri A et al. Role of Patient Coping Strategies in Understanding the Effects of Early Palliative Care on Quality of Life and Mood. *Journal of Clinical Oncology* 2018; 36: 53-60.

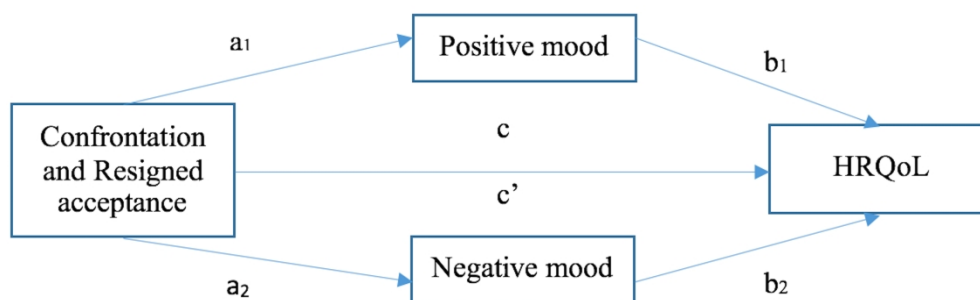

Positive and negative mood as mediators of the association between coping and HRQoL

Table 1 Mood and Health-related Quality of Life by Socio-demographic and Clinical Characteristics

| Variables                                        | M(SD) / n (%) | Positive mood | Negative mood | Mobility    | Self-care   | Usual activities | Pain/discomfort | Anxiety/depression | EQ-5D utility index |
|--------------------------------------------------|---------------|---------------|---------------|-------------|-------------|------------------|-----------------|--------------------|---------------------|
| <b>Age (years)</b>                               | 59.99 (9.53)  |               |               |             |             |                  |                 |                    |                     |
| <b>Gender</b>                                    |               |               |               |             |             |                  |                 |                    |                     |
| Male                                             | 183 (70.1%)   | 2.41 (0.75)   | 1.80 (0.73)   | 4.39 (0.95) | 4.63 (0.79) | 4.33 (0.92)      | 4.03 (0.87)     | 4.24 (0.75)        | 0.81 (0.17)         |
| Female                                           | 78 (29.9%)    | 2.34 (0.78)   | 1.93 (0.83)   | 4.21 (1.04) | 4.50 (0.96) | 4.06 (1.05)      | 3.91 (0.87)     | 4.21 (0.65)        | 0.78 (0.21)         |
| <b>Education</b>                                 |               |               |               |             |             |                  |                 |                    |                     |
| Elementary school or lower                       | 55 (21.1%)    | 2.28 (0.79)   | 1.82 (0.73)   | 4.54 (0.92) | 4.64 (0.80) | 4.31 (0.96)      | 3.98 (0.91)     | 4.11 (0.74)        | 0.80 (0.18)         |
| Middle school                                    | 91 (34.9%)    | 2.35 (0.69)   | 1.94 (0.79)   | 4.24 (0.96) | 4.57 (0.86) | 4.14 (1.04)      | 3.90 (0.87)     | 4.16 (0.79)        | 0.78 (0.19)         |
| High school                                      | 66 (25.3%)    | 2.46 (0.77)   | 1.71 (0.63)   | 4.32 (1.08) | 4.59 (0.89) | 4.29 (0.96)      | 4.05 (0.79)     | 4.32 (0.66)        | 0.82 (0.17)         |
| College or higher                                | 49 (18.8%)    | 2.51 (0.84)   | 1.83 (0.88)   | 4.41 (0.96) | 4.59 (0.84) | 4.35 (0.86)      | 4.10 (0.94)     | 4.35 (0.63)        | 0.83 (0.20)         |
| <b>Marital status</b>                            |               |               |               |             |             |                  |                 |                    |                     |
| Married                                          | 247 (94.6%)   | 2.40 (0.77)   | 1.83 (0.76)   | 4.34 (0.98) | 4.60 (0.85) | 4.25 (0.98)      | 3.98 (0.89)     | 4.23 (0.71)        | 0.80 (0.19)         |
| Single/divorced/widowed                          | 14 (5.4%)     | 2.23 (0.58)   | 1.86 (0.82)   | 4.21 (1.05) | 4.57 (0.85) | 4.29 (0.83)      | 4.21 (0.58)     | 4.07 (1.00)        | 0.78 (0.18)         |
| <b>Perceived cancer-related financial burden</b> |               |               |               |             |             |                  |                 |                    |                     |
| None                                             | 37 (14.2%)    | 2.72 (0.89)   | 1.47 (0.50)   | 4.86 (0.42) | 4.92 (0.28) | 4.81 (0.46)      | 4.51 (0.56)     | 4.59 (0.50)        | 0.92 (0.08)         |
| Slight                                           | 100 (38.3%)   | 2.27 (0.74)   | 1.74 (0.63)   | 4.21 (1.09) | 4.54 (0.88) | 4.23 (0.91)      | 3.91 (0.79)     | 4.22 (0.56)        | 0.78 (0.19)         |
| Moderate                                         | 63 (24.1%)    | 2.53 (0.80)   | 1.87 (0.74)   | 4.43 (0.86) | 4.65 (0.79) | 4.17 (0.98)      | 3.90 (0.93)     | 4.27 (0.70)        | 0.80 (0.18)         |
| Severe                                           | 36 (13.8%)    | 2.16 (0.51)   | 1.94 (0.84)   | 4.25 (0.77) | 4.64 (0.68) | 4.22 (0.90)      | 4.06 (1.01)     | 4.19 (0.71)        | 0.82 (0.14)         |
| Very Severe                                      | 25 (9.6%)     | 2.38 (0.62)   | 2.52 (1.02)   | 3.96 (1.34) | 4.12 (1.33) | 3.76 (1.42)      | 3.68 (0.95)     | 3.64 (1.19)        | 0.68 (0.26)         |
| <b>Time since diagnosis<sup>a</sup></b>          |               |               |               |             |             |                  |                 |                    |                     |
| Less than 6 months                               | 144 (55.2%)   | 2.38 (0.77)   | 1.84 (0.77)   | 4.40 (0.96) | 4.60 (0.84) | 4.24 (1.02)      | 3.95 (0.90)     | 4.19 (0.76)        | 0.80 (0.19)         |
| 6-12months                                       | 32 (12.3%)    | 2.54 (0.68)   | 1.91 (0.72)   | 4.19 (1.28) | 4.50 (1.05) | 4.19 (1.12)      | 4.19 (0.78)     | 4.19 (0.82)        | 0.79 (0.23)         |
| 12-24 months                                     | 31 (11.9%)    | 2.54 (0.87)   | 1.71 (0.75)   | 4.35 (0.80) | 4.71 (0.53) | 4.42 (0.62)      | 3.97 (0.71)     | 4.32 (0.65)        | 0.83 (0.11)         |

|    |                                     |             |             |             |             |             |             |             |             |             |
|----|-------------------------------------|-------------|-------------|-------------|-------------|-------------|-------------|-------------|-------------|-------------|
| 1  |                                     |             |             |             |             |             |             |             |             |             |
| 2  |                                     |             |             |             |             |             |             |             |             |             |
| 3  | More than 24                        | 46 (17.6%)  | 2.25 (0.72) | 1.86 (0.75) | 4.17 (1.00) | 4.48 (0.96) | 4.17 (0.93) | 3.91 (0.96) | 4.26 (0.61) | 0.78 (0.20) |
| 4  | months                              |             |             |             |             |             |             |             |             |             |
| 5  | <b>Stage</b>                        |             |             |             |             |             |             |             |             |             |
| 6  | III                                 | 82 (31.4%)  | 2.50 (0.71) | 1.96 (0.90) | 4.35 (0.93) | 4.55 (0.86) | 4.20 (1.09) | 3.95 (0.94) | 4.13 (0.78) | 0.79 (0.19) |
| 7  | IV                                  | 179 (68.6%) | 2.34 (0.78) | 1.78 (0.68) | 4.33 (1.00) | 4.61 (0.84) | 4.28 (0.91) | 4.01 (0.84) | 4.27 (0.69) | 0.81 (0.18) |
| 8  | <b>Lung cancer type<sup>b</sup></b> |             |             |             |             |             |             |             |             |             |
| 9  | NSC-                                | 140 (53.6%) | 2.39 (0.78) | 1.88 (0.79) | 4.28 (0.99) | 4.56 (0.85) | 4.20 (0.94) | 3.91 (0.92) | 4.18 (0.70) | 0.79 (0.19) |
| 10 | Adenocarcinoma                      |             |             |             |             |             |             |             |             |             |
| 11 | NSC-Squamous                        | 47 (18.0%)  | 2.50 (0.81) | 1.84 (0.80) | 4.45 (0.85) | 4.68 (0.63) | 4.32 (0.86) | 4.00 (0.81) | 4.26 (0.57) | 0.81 (0.14) |
| 12 | NSC-Poorly                          | 24 (9.2%)   | 2.46 (0.61) | 1.77 (0.67) | 4.08 (1.25) | 4.38 (1.21) | 3.88 (1.39) | 3.75 (0.94) | 4.13 (0.99) | 0.72 (0.24) |
| 13 | differentiated                      |             |             |             |             |             |             |             |             |             |
| 14 | NSC-others                          | 7 (2.7%)    | 2.30 (0.60) | 1.64 (0.40) | 4.71 (0.49) | 5.00 (0.00) | 4.71 (0.49) | 4.71 (0.49) | 4.57 (0.53) | 0.92 (0.10) |
| 15 | Small cell                          | 43 (16.5%)  | 2.26 (0.76) | 1.76 (0.71) | 4.49 (0.96) | 4.67 (0.87) | 4.49 (0.88) | 4.26 (0.73) | 4.35 (0.78) | 0.85 (0.17) |
| 16 | <b>Treatment</b>                    |             |             |             |             |             |             |             |             |             |
| 17 | Received surgery                    |             |             |             |             |             |             |             |             |             |
| 18 | Yes                                 | 61 (23.4%)  | 2.49 (0.78) | 1.95 (0.85) | 4.20 (0.98) | 4.51 (0.83) | 4.20 (0.96) | 3.97 (0.86) | 4.30 (0.74) | 0.80 (0.18) |
| 19 | No                                  | 200 (76.6%) | 2.36 (0.75) | 1.80 (0.73) | 4.38 (0.98) | 4.62 (0.85) | 4.27 (0.97) | 4.00 (0.88) | 4.21 (0.72) | 0.80 (0.19) |
| 20 | Received                            |             |             |             |             |             |             |             |             |             |
| 21 | chemotherapy                        |             |             |             |             |             |             |             |             |             |
| 22 | Yes                                 | 252 (96.6%) | 2.40 (0.76) | 1.83 (0.76) | 4.33 (0.99) | 4.59 (0.86) | 4.25 (0.98) | 4.00 (0.87) | 4.22 (0.73) | 0.80 (0.19) |
| 23 | No                                  | 9 (3.4%)    | 2.16 (0.68) | 1.83 (0.72) | 4.44 (0.73) | 4.67 (0.50) | 4.33 (0.71) | 3.67 (1.00) | 4.33 (0.50) | 0.81 (0.16) |
| 24 | Received                            |             |             |             |             |             |             |             |             |             |
| 25 | radiotherapy                        |             |             |             |             |             |             |             |             |             |
| 26 | Yes                                 | 61 (23.4%)  | 2.36 (0.70) | 2.04 (0.87) | 4.05 (1.19) | 4.33 (1.21) | 4.02 (1.09) | 3.74 (1.05) | 4.13 (0.62) | 0.74 (0.23) |
| 27 | No                                  | 200 (76.6%) | 2.40 (0.78) | 1.77 (0.71) | 4.43 (0.89) | 4.68 (0.69) | 4.33 (0.92) | 4.07 (0.80) | 4.26 (0.75) | 0.82 (0.16) |
| 28 | Received targeted                   |             |             |             |             |             |             |             |             |             |
| 29 | therapy                             |             |             |             |             |             |             |             |             |             |
| 30 | Yes                                 | 38 (14.6%)  | 2.24 (0.79) | 1.83 (0.56) | 4.21 (1.14) | 4.47 (1.08) | 4.11 (1.09) | 3.79 (1.04) | 4.26 (0.64) | 0.77 (0.25) |
| 31 | No                                  | 223 (85.4%) | 2.42 (0.75) | 1.83 (0.79) | 4.36 (0.95) | 4.61 (0.80) | 4.28 (0.95) | 4.03 (0.84) | 4.22 (0.74) | 0.81 (0.17) |
| 32 |                                     |             |             |             |             |             |             |             |             |             |
| 33 |                                     |             |             |             |             |             |             |             |             |             |
| 34 |                                     |             |             |             |             |             |             |             |             |             |
| 35 |                                     |             |             |             |             |             |             |             |             |             |
| 36 |                                     |             |             |             |             |             |             |             |             |             |
| 37 |                                     |             |             |             |             |             |             |             |             |             |
| 38 |                                     |             |             |             |             |             |             |             |             |             |
| 39 |                                     |             |             |             |             |             |             |             |             |             |
| 40 |                                     |             |             |             |             |             |             |             |             |             |
| 41 |                                     |             |             |             |             |             |             |             |             |             |
| 42 |                                     |             |             |             |             |             |             |             |             |             |
| 43 |                                     |             |             |             |             |             |             |             |             |             |
| 44 |                                     |             |             |             |             |             |             |             |             |             |
| 45 |                                     |             |             |             |             |             |             |             |             |             |
| 46 |                                     |             |             |             |             |             |             |             |             |             |

1  
2  
3  
4  
5  
6  
7  
8  
9  
10  
11  
12  
13  
14  
15  
16  
17  
18  
19  
20  
21  
22  
23  
24  
25  
26  
27  
28  
29  
30  
31  
32  
33  
34  
35  
36  
37  
38  
39  
40  
41  
42  
43  
44  
45  
46

Scale range: Confrontation, resigned acceptance: 1 (never) – 4 (very often); Positive mood, negative mood: 1 (very slightly) – 5 (extremely);  
Mobility, self-care, usual activities, pain/discomfort, anxiety/depression: 1 (very severe) – 5 (no); EQ-5D utility index: -1 (worse than death) – 1  
(full health)

For peer review only

Figure 1 Flow Chart of the Sample Selection Procedure

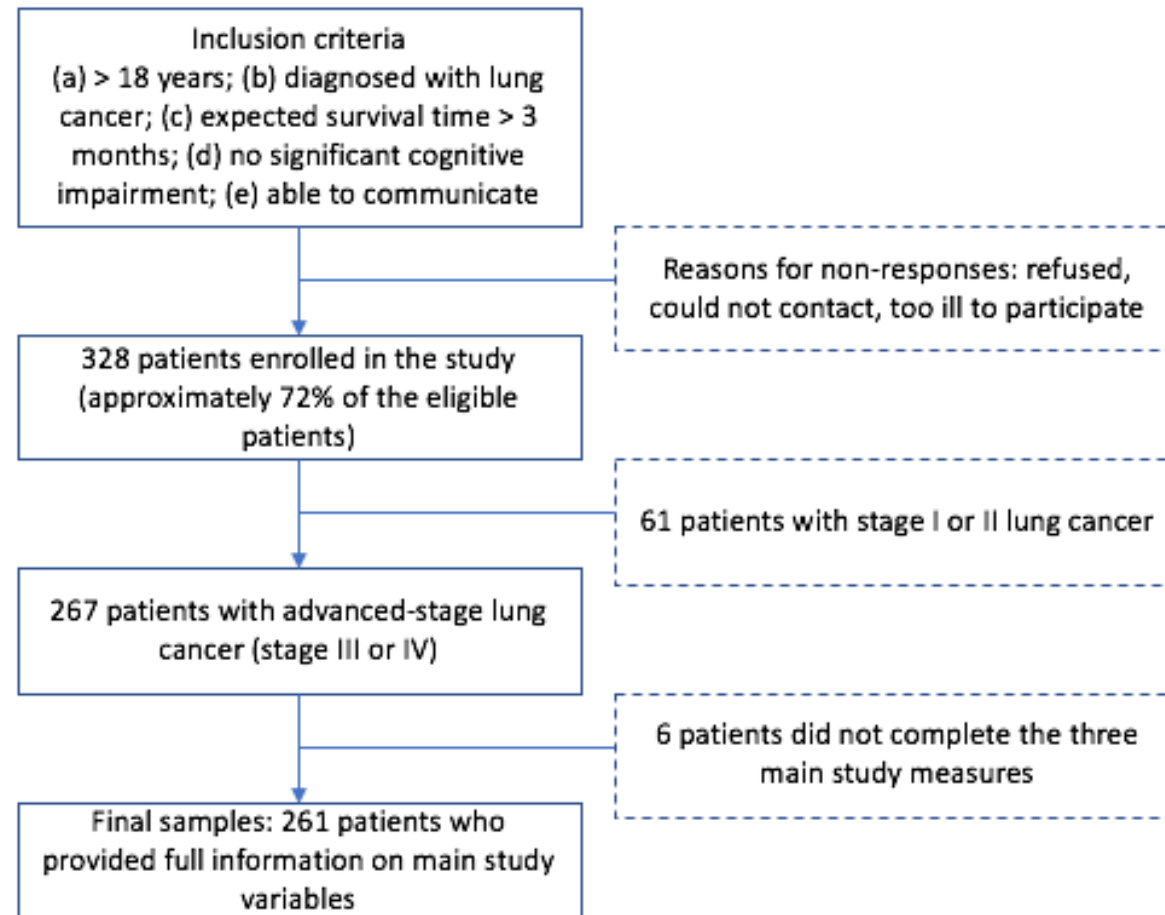



**STROBE 2007 (v4) checklist of items to be included in reports of observational studies in epidemiology\***  
**Checklist for cohort, case-control, and cross-sectional studies (combined)**

| Section/Topic             | Item # | Recommendation                                                                                                                                                                                                                                                                                                                                                                                                                                                         | Reported on page # |
|---------------------------|--------|------------------------------------------------------------------------------------------------------------------------------------------------------------------------------------------------------------------------------------------------------------------------------------------------------------------------------------------------------------------------------------------------------------------------------------------------------------------------|--------------------|
| Title and abstract        | 1      | (a) Indicate the study's design with a commonly used term in the title or the abstract                                                                                                                                                                                                                                                                                                                                                                                 | 1,2                |
|                           |        | (b) Provide in the abstract an informative and balanced summary of what was done and what was found                                                                                                                                                                                                                                                                                                                                                                    | 2,3                |
| <b>Introduction</b>       |        |                                                                                                                                                                                                                                                                                                                                                                                                                                                                        |                    |
| Background/rationale      | 2      | Explain the scientific background and rationale for the investigation being reported                                                                                                                                                                                                                                                                                                                                                                                   | 4-7                |
| Objectives                | 3      | State specific objectives, including any pre-specified hypotheses                                                                                                                                                                                                                                                                                                                                                                                                      | 7                  |
| <b>Methods</b>            |        |                                                                                                                                                                                                                                                                                                                                                                                                                                                                        |                    |
| Study design              | 4      | Present key elements of study design early in the paper                                                                                                                                                                                                                                                                                                                                                                                                                | 7-8                |
| Setting                   | 5      | Describe the setting, locations, and relevant dates, including periods of recruitment, exposure, follow-up, and data collection                                                                                                                                                                                                                                                                                                                                        | 7-8                |
| Participants              | 6      | (a) <i>Cohort study</i> —Give the eligibility criteria, and the sources and methods of selection of participants. Describe methods of follow-up<br><i>Case-control study</i> —Give the eligibility criteria, and the sources and methods of case ascertainment and control selection. Give the rationale for the choice of cases and controls<br><i>Cross-sectional study</i> —Give the eligibility criteria, and the sources and methods of selection of participants | 8                  |
|                           |        | (b) <i>Cohort study</i> —For matched studies, give matching criteria and number of exposed and unexposed<br><i>Case-control study</i> —For matched studies, give matching criteria and the number of controls per case                                                                                                                                                                                                                                                 |                    |
| Variables                 | 7      | Clearly define all outcomes, exposures, predictors, potential confounders, and effect modifiers. Give diagnostic criteria, if applicable                                                                                                                                                                                                                                                                                                                               | 8-10               |
| Data sources/ measurement | 8*     | For each variable of interest, give sources of data and details of methods of assessment (measurement). Describe comparability of assessment methods if there is more than one group                                                                                                                                                                                                                                                                                   | 8-10               |
| Bias                      | 9      | Describe any efforts to address potential sources of bias                                                                                                                                                                                                                                                                                                                                                                                                              |                    |
| Study size                | 10     | Explain how the study size was arrived at                                                                                                                                                                                                                                                                                                                                                                                                                              | 11                 |
| Quantitative variables    | 11     | Explain how quantitative variables were handled in the analyses. If applicable, describe which groupings were chosen and why                                                                                                                                                                                                                                                                                                                                           | 10-11              |
| Statistical methods       | 12     | (a) Describe all statistical methods, including those used to control for confounding                                                                                                                                                                                                                                                                                                                                                                                  | 10-11              |
|                           |        | (b) Describe any methods used to examine subgroups and interactions                                                                                                                                                                                                                                                                                                                                                                                                    |                    |
|                           |        | (c) Explain how missing data were addressed                                                                                                                                                                                                                                                                                                                                                                                                                            | 8                  |
|                           |        | (d) <i>Cohort study</i> —If applicable, explain how loss to follow-up was addressed<br><i>Case-control study</i> —If applicable, explain how matching of cases and controls was addressed                                                                                                                                                                                                                                                                              | Not applicable     |

|                          |     |                                                                                                                                                                                                              |                        |
|--------------------------|-----|--------------------------------------------------------------------------------------------------------------------------------------------------------------------------------------------------------------|------------------------|
|                          |     | <i>Cross-sectional study</i> —If applicable, describe analytical methods taking account of sampling strategy                                                                                                 |                        |
|                          |     | (e) Describe any sensitivity analyses                                                                                                                                                                        |                        |
| <b>Results</b>           |     |                                                                                                                                                                                                              |                        |
| Participants             | 13* | (a) Report numbers of individuals at each stage of study—eg numbers potentially eligible, examined for eligibility, confirmed eligible, included in the study, completing follow-up, and analysed            | 9                      |
|                          |     | (b) Give reasons for non-participation at each stage                                                                                                                                                         | Supplementary figure 1 |
|                          |     | (c) Consider use of a flow diagram                                                                                                                                                                           | Supplementary figure 1 |
| Descriptive data         | 14* | (a) Give characteristics of study participants (eg demographic, clinical, social) and information on exposures and potential confounders                                                                     | 11-13                  |
|                          |     | (b) Indicate number of participants with missing data for each variable of interest                                                                                                                          | 13                     |
|                          |     | (c) <i>Cohort study</i> —Summarise follow-up time (eg, average and total amount)                                                                                                                             | Not applicable         |
| Outcome data             | 15* | <i>Cohort study</i> —Report numbers of outcome events or summary measures over time                                                                                                                          | Not applicable         |
|                          |     | <i>Case-control study</i> —Report numbers in each exposure category, or summary measures of exposure                                                                                                         | Not applicable         |
|                          |     | <i>Cross-sectional study</i> —Report numbers of outcome events or summary measures                                                                                                                           | 14,15                  |
| Main results             | 16  | (a) Give unadjusted estimates and, if applicable, confounder-adjusted estimates and their precision (eg, 95% confidence interval). Make clear which confounders were adjusted for and why they were included | 14-22                  |
|                          |     | (b) Report category boundaries when continuous variables were categorized                                                                                                                                    | 14-22                  |
|                          |     | (c) If relevant, consider translating estimates of relative risk into absolute risk for a meaningful time period                                                                                             | Not applicable         |
| Other analyses           | 17  | Report other analyses done—eg analyses of subgroups and interactions, and sensitivity analyses                                                                                                               |                        |
| <b>Discussion</b>        |     |                                                                                                                                                                                                              |                        |
| Key results              | 18  | Summarise key results with reference to study objectives                                                                                                                                                     | 23                     |
| Limitations              | 19  | Discuss limitations of the study, taking into account sources of potential bias or imprecision. Discuss both direction and magnitude of any potential bias                                                   | 25-26                  |
| Interpretation           | 20  | Give a cautious overall interpretation of results considering objectives, limitations, multiplicity of analyses, results from similar studies, and other relevant evidence                                   | 23-26                  |
| Generalisability         | 21  | Discuss the generalisability (external validity) of the study results                                                                                                                                        | 25-26                  |
| <b>Other information</b> |     |                                                                                                                                                                                                              |                        |
| Funding                  | 22  | Give the source of funding and the role of the funders for the present study and, if applicable, for the original study on which the present article is based                                                | 27                     |

\*Give information separately for cases and controls in case-control studies and, if applicable, for exposed and unexposed groups in cohort and cross-sectional studies.

1  
2  
3  
4  
5  
6  
7  
8  
9  
10  
11  
12  
13  
14  
15  
16  
17  
18  
19  
20  
21  
22  
23  
24  
25  
26  
27  
28  
29  
30  
31  
32  
33  
34  
35  
36  
37  
38  
39  
40  
41  
42  
43  
44  
45  
46

**Note:** An Explanation and Elaboration article discusses each checklist item and gives methodological background and published examples of transparent reporting. The STROBE checklist is best used in conjunction with this article (freely available on the Web sites of PLoS Medicine at <http://www.plosmedicine.org/>, Annals of Internal Medicine at <http://www.annals.org/>, and Epidemiology at <http://www.epidem.com/>). Information on the STROBE Initiative is available at [www.strobe-statement.org](http://www.strobe-statement.org).

For peer review only

# BMJ Open

## Coping, mood, and health-related quality of life: A cross-sectional study in Chinese patients with advanced lung cancer

|                                 |                                                                                                                                                                                                                                                                                                                                                                                                                                                                                                                                                                                                                                                                                                                                                                                                                                                                                                                                                                                                                                                                                                                                                                                                             |
|---------------------------------|-------------------------------------------------------------------------------------------------------------------------------------------------------------------------------------------------------------------------------------------------------------------------------------------------------------------------------------------------------------------------------------------------------------------------------------------------------------------------------------------------------------------------------------------------------------------------------------------------------------------------------------------------------------------------------------------------------------------------------------------------------------------------------------------------------------------------------------------------------------------------------------------------------------------------------------------------------------------------------------------------------------------------------------------------------------------------------------------------------------------------------------------------------------------------------------------------------------|
| Journal:                        | <i>BMJ Open</i>                                                                                                                                                                                                                                                                                                                                                                                                                                                                                                                                                                                                                                                                                                                                                                                                                                                                                                                                                                                                                                                                                                                                                                                             |
| Manuscript ID                   | bmjopen-2018-023672.R3                                                                                                                                                                                                                                                                                                                                                                                                                                                                                                                                                                                                                                                                                                                                                                                                                                                                                                                                                                                                                                                                                                                                                                                      |
| Article Type:                   | Research                                                                                                                                                                                                                                                                                                                                                                                                                                                                                                                                                                                                                                                                                                                                                                                                                                                                                                                                                                                                                                                                                                                                                                                                    |
| Date Submitted by the Author:   | 08-Jan-2019                                                                                                                                                                                                                                                                                                                                                                                                                                                                                                                                                                                                                                                                                                                                                                                                                                                                                                                                                                                                                                                                                                                                                                                                 |
| Complete List of Authors:       | <p>He, Yaping; Shanghai Jiao Tong University, School of Public Health; Shanghai Jiao Tong University, Center for Health Technology Assessment, Shanghai Jiao Tong University China Hospital Development Institute</p> <p>Jian, Hong; Shanghai Chest Hospital, Shanghai Jiao Tong University, Department of Oncology</p> <p>Yan, Meiqiong; Shanghai Chest Hospital, Shanghai Jiao Tong University, Department of Oncology</p> <p>Zhu, Jingfen; Shanghai Jiao Tong University, School of Public Health; Shanghai Jiao Tong University, Center for Health Technology Assessment, Shanghai Jiao Tong University China Hospital Development Institute</p> <p>Li, Guohong; Shanghai Jiao Tong University, School of Public Health; Shanghai Jiao Tong University, Center for Health Technology Assessment, Shanghai Jiao Tong University China Hospital Development Institute</p> <p>Lou, Vivian W. Q.; The University of Hong Kong, Department of Social Work &amp; Social Administration; The University of Hong Kong, Sau Po Centre on Ageing</p> <p>Chen, Jieling; The University of Hong Kong, Department of Social Work and Social Administration; The University of Hong Kong, Sau Po Centre on Ageing</p> |
| <b>Primary Subject Heading</b>: | Oncology                                                                                                                                                                                                                                                                                                                                                                                                                                                                                                                                                                                                                                                                                                                                                                                                                                                                                                                                                                                                                                                                                                                                                                                                    |
| Secondary Subject Heading:      | Patient-centred medicine                                                                                                                                                                                                                                                                                                                                                                                                                                                                                                                                                                                                                                                                                                                                                                                                                                                                                                                                                                                                                                                                                                                                                                                    |
| Keywords:                       | coping, quality of life, lung cancer, mood                                                                                                                                                                                                                                                                                                                                                                                                                                                                                                                                                                                                                                                                                                                                                                                                                                                                                                                                                                                                                                                                                                                                                                  |
|                                 |                                                                                                                                                                                                                                                                                                                                                                                                                                                                                                                                                                                                                                                                                                                                                                                                                                                                                                                                                                                                                                                                                                                                                                                                             |

SCHOLARONE™  
Manuscripts

## COPING, MOOD AND HRQOL IN LUNG CANCER PATIENTS

Coping, mood, and health-related quality of life: A cross-sectional study in Chinese patients  
with advanced lung cancer

He, Yaping <sup>1,2</sup>

Jian, Hong <sup>3</sup>

Yan, Meiqiong <sup>3</sup>

Zhu, Jingfen <sup>1,2</sup>

Li, Guohong <sup>1,2</sup>

Lou, Weiqun, Vivian <sup>4,5</sup>

Chen, Jieling <sup>4,5</sup>

Affiliation:

1. School of Public Health, Shanghai Jiao Tong University
2. Center for Health Technology Assessment, Shanghai Jiao Tong University China  
Hospital Development Institute
3. Department of Oncology, Shanghai Chest Hospital, Shanghai Jiao Tong University
4. Department of Social Work & Social Administration, The University of Hong Kong
5. Sau Po Centre on Ageing, The University of Hong Kong

Corresponding author: Chen Jieling, Elaine, Department of Social Work & Social  
Administration, The University of Hong Kong, Pokfulam Road, Hong Kong,  
elaine09@connect.hku.hk; Lou, Weiqun, Vivian, PhD, Department of Social Work & Social  
Administration, Sau Po Centre on Ageing, The University of Hong Kong, Pokfulam Road,  
Hong Kong, (+852)39174835, wlou@hku.hk.

## COPING, MOOD AND HRQOL IN LUNG CANCER PATIENTS

## Abstract

**Objectives:** The ways patients cope with advanced cancer can influence their health-related quality of life (HRQoL). This study aims to examine the mediating role of positive and negative mood in the relationship between coping and HRQoL in patients with advanced lung cancer.

**Methods:** A consecutive sample of 261 patients (mean age:  $59.99 \pm 9.53$ ) diagnosed with stage III or IV lung cancer was recruited from the inpatient unit in a hospital that specializes in chest-related disease in Shanghai, China. Participants completed measurements including Medical Coping Modes Questionnaire, Positive and Negative Affect Schedule, and 5-level EuroQol 5-dimension instrument.

**Results:** Although the total effects of confrontation on HRQoL were not significant, competing indirect effects via mood were identified: (1) Positive indirect effects through positive mood were found for confrontation on mobility, usual activities, pain/discomfort, and overall utility index (indirect effect = 0.01, 95% CI 0.003 to 0.03); (2) Negative indirect effects through negative mood were found for confrontation on mobility, pain/discomfort, anxiety/depression, and overall utility index (indirect effect = -0.01, 95% CI -0.03 to -0.001). Resigned acceptance was negatively associated with HRQoL, and indirect effects via mood were identified: (1) Negative indirect effects through positive mood were found for resigned acceptance on mobility, self-care, usual activities, pain/discomfort, and overall utility index (indirect effect = -0.01, 95% CI -0.03 to -0.003); (2) Negative indirect effects through negative mood were found for resigned acceptance on domains of HRQoL and overall utility index (indirect effect = -0.04, 95% CI -0.06 to -0.02).

**Conclusions:** Confronting advanced lung cancer can fuel ambivalent emotional experiences. Nevertheless, accepting the illness in a resigned way can be maladaptive for health outcomes.

## COPING, MOOD AND HRQOL IN LUNG CANCER PATIENTS

The findings suggest interventions that facilitate adaptive coping, reduce negative mood, and enhance positive mood, as this could help to improve or maintain HRQoL in patients with advanced lung cancer.

**Keywords:** coping; quality of life; mood; lung cancer

## Strengths and limitations of this study

- The study addressed health-related quality of life (HRQoL), an important health outcome of treatment for advanced lung cancer, and examined the psychological factors associated with HRQoL.
- The study examined the mediating role of positive and negative mood in the relationship between coping and a range of health outcomes (mobility, self-care, usual activities, pain/discomfort, anxiety/depression, overall HRQoL), which identifies the potential pathways between coping and HRQoL in patients with advanced lung cancer.
- Consecutive sampling could compromise the generalizability of the findings.
- Cross-sectional design.

## 1. Introduction

During the past decade, lung cancer has become the most common incident cancer and the leading cause of cancer mortality in China and many other countries [1, 2]. The diagnosis of lung cancer can result in enormous stress for patients and their families, such as symptom burden [3], decisions about treatment options [4], and financial concerns [5]. The quality of life is significantly affected in patients with an advanced lung cancer [6]. The curative treatments are limited for advanced lung cancer, and the five-year survival rate of lung cancer is 16.1% in China [7]. Improving or maintaining quality of life is the main focus of treatment. The prognostic value of health-related quality of life (HRQoL) in patients with lung cancer is supported by a range of studies [8, 9].

Previous research has investigated socio-demographic, clinical, and psychosocial correlates of HRQoL in cancer patients [10]. Common risk factors identified from previous studies included older age, being female, financial burden, and advanced stage [11]. Specifically, coping strategy is indicated to contribute to HRQoL in patients with advanced cancer [12, 13]. The manner in which patients cope with the life-threatening illness may affect patients' emotional state, perceptions of illness, and health behaviors, which can have an impact on the treatment course and ultimately health outcomes [14]. Two coping strategies, confrontation and acceptance, have received considerable attention in patients with a life-threatening illness [14-17].

Confrontation is defined as a set of coping strategies that involves seeking information and advice from various sources, seeking support from family and friends, and engaging in decision making [15]. It is actively oriented, which is indicated to be adaptive for cancer patients and associated with lower negative mood [18-20] and better quality of life [16, 17]. However, other studies found insignificant associations between confrontation and



## COPING, MOOD AND HRQOL IN LUNG CANCER PATIENTS

1  
2  
3 health outcomes among cancer patients [14, 21, 22]. For instance, Nipp et al. [14] studied 350  
4  
5 patients with incurable lung or gastrointestinal cancer, and found that using active coping was  
6  
7 not associated with psychological distress or quality of life. It is suggested that confrontation  
8  
9 could direct one's attention to the disease and its side effects, making it less effective in  
10  
11 coping with cancer [15, 17].  
12  
13  
14

15 Acceptance is regarded as a strategy to cope with unchangeable or uncontrollable  
16  
17 negative events [23]. Resigned acceptance is a form of acceptance, specifically, a passive  
18  
19 form of acceptance, in which individuals accept the stressful situation and give up endeavors  
20  
21 or hope to deal with it [23, 24]. It is different from the concept of acceptance in Acceptance  
22  
23 and Commitment Therapy, which is a form of active acceptance and characterized by active  
24  
25 embracing of thoughts and feelings without unnecessary attempts to alter them [25]. Research  
26  
27 shows that resigned acceptance could be maladaptive, which was associated with less  
28  
29 favorable outcomes, such as negative mood and lower quality of life, in cancer patients and  
30  
31 survivors [21, 26, 27].  
32  
33  
34  
35

36 Confrontation and resigned acceptance may be associated with cultural views of  
37  
38 illness in the Chinese cancer population. Confucianism and Taoism are two dominant  
39  
40 philosophical tenets in Chinese culture [28]. Confucian beliefs emphasize the importance of  
41  
42 life, and death is a taboo and perceived as a negative event [29]. Consistent with this, the  
43  
44 majority of patients and their families in China would choose to continue curative treatments  
45  
46 to sustain and prolong life until the end of life [30]. On the other hand, cancer and other  
47  
48 illness are believed to be an act of Ming (also known as fate) in the Taoist belief system [28].  
49  
50 The fatalistic attitude toward cancer may lead to resigned acceptance, which may affect  
51  
52 health outcomes during the illness trajectory [28].  
53  
54  
55  
56  
57  
58  
59  
60

## COPING, MOOD AND HRQOL IN LUNG CANCER PATIENTS

1  
2  
3  
4  
5  
6  
7  
8  
9  
10  
11  
12  
13  
14  
15  
16  
17  
18  
19  
20  
21  
22  
23  
24  
25  
26  
27  
28  
29  
30  
31  
32  
33  
34  
35  
36  
37  
38  
39  
40  
41  
42  
43  
44  
45  
46  
47  
48  
49  
50  
51  
52  
53  
54  
55  
56  
57  
58  
59  
60

Although research shows that coping is associated with HRQoL in cancer patients, the mechanism of the link between coping and HRQoL remains largely unexamined in cancer patients. Preliminary exploration suggests that mood may be a potential pathway between coping and health outcomes [31-35]. Folkman and Greer developed a model of stress and coping for serious illness, and Roberts et al. revised the model based on studies among patients with advanced cancer [36, 37]. The models highlight the association between coping and emotional outcomes in the face of cancer, as the way patients cope with the stressors can influence the emotional outcomes, leading to positive and/or negative emotion [36, 37]. On the other hand, studies indicate that mood is linked to health outcomes (e.g., HRQoL) in cancer patients and survivors [27, 38, 39]. Negative and positive mood involves different physiological responses (e.g., nervous, endocrine, and immune system functioning), which can influence overall physical health [40, 41]. Additionally, the broaden-and-build theory of positive mood indicates that positive mood can broaden one's attention scope and thought-action repertoires, which could be beneficial for physical health. In contrast, negative mood can fuel a narrowed, socially isolating thought-action tendencies, which could result in poor health outcomes [42, 43]. Given that coping strategies are related to mood, and that mood is related to HRQoL, it is possible that mood may be a mediational pathway between coping and HRQoL. In a prospective study among HIV caregivers, higher social coping predicted an increase in positive affect, which decreased levels of physical symptoms, whereas higher cognitive avoidance predicted enhanced negative affect, which resulted in higher levels of physical symptoms [33]. However, in the context of advanced cancer, to our knowledge, no study has examined the pathways between coping and HRQoL through mood. Since patients with advanced cancer can encounter numerous stresses, understanding the effect of coping on health and identifying the pathways through which patients maintain health and quality of life can provide important insights for clinical practice and interventions.

## COPING, MOOD AND HRQOL IN LUNG CANCER PATIENTS

1  
2  
3 In summary, the current study addresses the relationships between coping, mood, and  
4 HRQoL among patients with advanced lung cancer. Specifically, we examined the effect of  
5 confrontation and resigned acceptance coping on positive mood, negative mood, and  
6 HRQoL. We also tested the mediating role of positive and negative mood in the relationship  
7 between coping and HRQoL among Chinese patients with advanced lung cancer.  
8  
9  
10  
11  
12  
13  
14  
15  
16  
17

## 18 2. Method

### 19 2.1 Study setting and participants

20  
21  
22  
23  
24 Participants were recruited from the inpatient unit of the department of chest-  
25 oncology medicine at a public hospital that specializes in chest-related disease in Shanghai,  
26 China. The hospital is well recognized for its expertise, resources, and treatments for chest-  
27 related disease. A large number of patients with lung cancer in east China come to this  
28 hospital and receive treatment there. Patients were eligible in the study if they (a) were 18  
29 years or older, (b) had been diagnosed with lung cancer, (c) had an expected survival time > 3  
30 months, (d) had no significant cognitive impairment, and (e) were able to communicate with  
31 interviewers. Studies show that cancer patients may experience a steep decline in HRQoL  
32 during the last 3 months of life [44]. Therefore, we purposefully included only those with an  
33 expected survival time of at least 3 months. Those who could not understand the questions  
34 were excluded from the sample. Between June 2016 and July 2016, 328 patients met the  
35 inclusion criteria and were enrolled in the study.  
36  
37  
38  
39  
40  
41  
42  
43  
44  
45  
46  
47  
48  
49  
50  
51

52 Data collection was conducted by trained undergraduate students majoring in  
53 medicine and public health. Doctors and nurses in the inpatient unit of the department of  
54 chest-oncology medicine screened the eligible patients based on the inclusion and exclusion  
55 criteria, and researchers approached them and introduced the study. Those who agreed to  
56  
57  
58  
59  
60

## COPING, MOOD AND HRQOL IN LUNG CANCER PATIENTS

participate in the study provided informed consent. Face-to-face interviews were then conducted. Disease and treatment information was extracted from medical records. The study was approved by the Ethics Committee of Shanghai Chest Hospital, Shanghai Jiao Tong University (No. KS1353). In accordance with our study aim, we focused on 267 patients with advanced-stage lung cancer (stage III or IV), and the 261 participants who provided full information on the main study variables (coping, mood, and HRQoL) were included in the data analysis. A flow chart of the sample selection procedure is presented in supplementary Figure 1.

## 2.2 Participant and public involvement

The participants were not involved in the design or recruitment process of this study. However, the patients in department of oncology who worked with the 2<sup>nd</sup> author (an oncologist) provided insights for the development of the research question. Permission to conduct the study was obtained from relevant hospital authorities and participants.

## 2.3 Measures

**2.3.1 Health-related quality of life.** The 5-level EuroQol 5-dimension (EQ-5D-5L) was used to measure HRQoL in this study [45]. It contained five questions to assess five health dimensions, as experienced in the recent days, namely mobility, self-care, usual activities, pain/discomfort, and anxiety/depression. Respondents rated the severity on 5 levels ranging from 1 (*no*) to 5 (*very severe*). In the current study, EQ-5D-5L domain scores and overall utility index were calculated. Domain scores were recoded reversely based on the original levels of each domain, with higher scores indicating better quality in the domain. EQ-5D-5L utility index was calculated based on value sets developed by the EuroQol Group. To our knowledge, no value sets have been developed in a Chinese representative sample for the calculation of utility index, so in this study, utility index was calculated based on value

## COPING, MOOD AND HRQOL IN LUNG CANCER PATIENTS

sets weighted from a representative sample of the English general population [46]. The EQ-5D-5L utility index ranged from -1 to 1, with 1 representing full health, 0 representing a state of death, and negative values representing a state worse than death.

**2.3.2 Coping.** Two subscales of the Chinese version of the Medical Coping Modes Questionnaire (MCMQ) were used to measure confrontation and resigned acceptance coping strategies for lung cancer. MCMQ was developed by Feifel, Strack, and Nagy [15] among patients with a variety of life-threatening and chronic illnesses, and it is widely used for assessing coping strategies in patients in China [17, 47]. Acceptance-resignation subscale had five items, and confrontation subscale had nine items [15]. Sample items in acceptance-resignation subscale were as follows: “there is nothing you can do about your illness”, “you don’t care what happens to you”, and “feel there is really no hope for your recovery.” Sample items in confrontation subscale were as follows: “obtained information through books, magazines, and newspapers in the past several months”, “try to talk about your illness with friends or relatives”, “be involved in decisions regarding your treatment.” In addition to original confrontation subscale with eight items, we added one item assessing how often participants “obtained information through the Internet and new media in the past several months,” as the Internet and new media have become important sources of information that supplement books, magazines, and newspaper. All the items were rated on a 4-point Likert scale ranging from 1 (*never*) to 4 (*very often*). The mean score of each coping strategy was calculated, with a higher score indicating a higher probability of using that particular coping strategy. The Cronbach’s  $\alpha$  coefficients of confrontation and resigned acceptance in this study were 0.72 and 0.71, respectively.

**2.3.3 Mood.** Mood was measured using the Positive and Negative Affect Schedule (PANAS) [48]. The PANAS contained items to describe 10 positive affects (e.g., inspired, excited, determined) and 10 negative affects (e.g., afraid, upset, distressed). Respondents

## COPING, MOOD AND HRQOL IN LUNG CANCER PATIENTS

1  
2  
3 rated their experiences of each affect during the past two weeks on a 5-point Likert scale  
4  
5 ranging from 1 (*very slightly*) to 5 (*extremely*). The mean scores of items on the two  
6  
7 subscales were calculated for positive mood and negative mood, respectively. In the current  
8  
9 study, the Cronbach's  $\alpha$  coefficients of negative mood and positive mood were 0.91 and 0.86,  
10  
11 respectively.  
12  
13

14  
15 **2.3.4 Covariates.** Sociodemographic factors included age, gender, education  
16  
17 (elementary school or lower, middle school, high school, college or higher), and marital  
18  
19 status (married, single, divorced, widowed). Perceived cancer-related financial burden was  
20  
21 assessed by the question, "Have your disease and treatment caused you and your family  
22  
23 financial difficulty?" and participants answered on a 5-point scale ranging from 0 (*No*) to 4  
24  
25 (*Very much*). Clinical factors included time of diagnosis, cancer stage, lung cancer type  
26  
27 (adenocarcinoma, squamous, poorly differentiated, small cell, not otherwise specified), and  
28  
29 treatment history (surgery, chemotherapy, radiotherapy, targeted therapy).  
30  
31  
32

## 33 34 35 **2.4 Data Analysis**

36  
37 First, descriptive statistics were presented for sociodemographic and clinical  
38  
39 characteristics, and main study variables. Mean and standard deviation, or frequency and  
40  
41 percentage, were computed for continuous and categorical variables, respectively.  
42  
43 Independent *t* test, analysis of variance, and post-hoc comparison were conducted to analyze  
44  
45 the effect of sociodemographic and clinical factors on positive mood, negative mood, and  
46  
47 HRQoL (see supplementary Table 1). Correlational analyses were performed to examine the  
48  
49 associations between the continuous variables.  
50  
51  
52

53  
54 Secondly, hierarchical, multiple, linear regression analyses were employed to  
55  
56 examine the relationships among coping, mood, and HRQoL. The hierarchical regressions  
57  
58 with HRQoL (domain scores and EQ-5D utility index) as a dependent variable involved three  
59  
60

## COPING, MOOD AND HRQOL IN LUNG CANCER PATIENTS

1  
2  
3 steps: In step one, gender, age, cancer stage, and covariates that were significantly correlated  
4 with mood and HRQoL (i.e., financial burden, lung cancer type, a history of radiotherapy)  
5 were entered; In step two, confrontation and resigned acceptance were entered; In step three,  
6 positive and negative mood were entered.  
7  
8  
9  
10  
11  
12

13 Thirdly, the mediating effects of positive and negative mood in the relationship  
14 between coping and HRQoL were tested using the *MEDIATE* macro for SPSS developed by  
15 Preacher and Hayes [49]. Bootstrapping techniques using 5000 samples were used for the  
16 analysis, which was regarded as providing a more reliable estimate for the small sample size.  
17 Significant indirect effect was indicated by a 95% confidence interval of indirect effect  
18 without including zero. Power analyses indicated that in a model with two parallel mediators,  
19 a sample of 260 has 80% power to detect a 95% confidence interval of indirect effect,  
20 assuming correlations of  $r = 0.20$  between independent variable, the dependent variable, and  
21 the mediators. Schoemann, Boulton, and Short suggest that this power analytic method is an  
22 appropriate approach for determining power and sample size in mediation models [50]. All  
23 tests were two tailed, and a  $p$ -value of  $<0.05$  was considered statistically significant.  
24  
25  
26  
27  
28  
29  
30  
31  
32  
33  
34  
35  
36  
37  
38

### 3. Results

#### 3.1 Sociodemographic and Clinical Characteristics

39  
40  
41  
42  
43  
44  
45 The sociodemographic and clinical characteristics for the samples are shown in Table  
46  
47 1. A total sample of 261 participants had a mean age of 59.99 years ( $SD = 9.53$ ). Males  
48 represented 70.1% of the samples. Most participants were married (94.6%) and perceived a  
49 slight to very severe cancer-related financial burden (85.8%). More than half of the  
50 participants had been diagnosed in the past 6 months (55.2%). More than 90% of the  
51 participants had ever received chemotherapy (96.6%), whereas a certain proportion had ever  
52 received surgery (23.4%), radiotherapy (23.4%), or targeted therapy (14.6%).  
53  
54  
55  
56  
57  
58  
59  
60

## COPING, MOOD AND HRQOL IN LUNG CANCER PATIENTS

Table 1 Sample Characteristics

| <b>Variables</b>                                 | <b>M(SD) / n (%)</b> |
|--------------------------------------------------|----------------------|
| <b>Age (years)</b>                               | 59.99 (9.53)         |
| <b>Gender</b>                                    |                      |
| Male                                             | 183 (70.1%)          |
| Female                                           | 78 (29.9%)           |
| <b>Education</b>                                 |                      |
| Elementary school or lower                       | 55 (21.1%)           |
| Middle school                                    | 91 (34.9%)           |
| High school                                      | 66 (25.3%)           |
| College or higher                                | 49 (18.8%)           |
| <b>Marital status</b>                            |                      |
| Married                                          | 247 (94.6%)          |
| Single/divorced/ widowed                         | 14 (5.4%)            |
| <b>Perceived cancer-related financial burden</b> |                      |
| None                                             | 37 (14.2%)           |
| Slight                                           | 100 (38.3%)          |
| Moderate                                         | 63 (24.1%)           |
| Severe                                           | 36 (13.8%)           |
| Very Severe                                      | 25 (9.6%)            |
| <b>Time since diagnosis <sup>a</sup></b>         |                      |
| Less than 6 months                               | 144 (55.2%)          |
| 6-12months                                       | 32 (12.3%)           |
| 12-24 months                                     | 31 (11.9%)           |
| More than 24 months                              | 46 (17.6%)           |
| <b>Stage</b>                                     |                      |
| III                                              | 82 (31.4%)           |
| IV                                               | 179 (68.6%)          |
| <b>Lung cancer type <sup>b</sup></b>             |                      |
| NSC - Adenocarcinoma                             | 140 (53.6%)          |
| NSC - Squamous                                   | 47 (18.0%)           |



## COPING, MOOD AND HRQOL IN LUNG CANCER PATIENTS

|                             |             |
|-----------------------------|-------------|
| NSC - Poorly differentiated | 24 (9.2%)   |
| NSC - Others                | 7 (2.7%)    |
| Small cell                  | 43 (16.5%)  |
| <b>Treatment history</b>    |             |
| Received surgery            |             |
| Yes                         | 61 (23.4%)  |
| No                          | 200 (76.6%) |
| Received chemotherapy       |             |
| Yes                         | 252 (96.6%) |
| No                          | 9 (3.4%)    |
| Received radiotherapy       |             |
| Yes                         | 61 (23.4%)  |
| No                          | 200 (76.6%) |
| Received targeted therapy   |             |
| Yes                         | 38 (14.6%)  |
| No                          | 223 (85.4%) |

*Note.* a. For time since diagnosis, the sum of number is not 261 due to missing data; b. NSC:

Non-small cell.

### 3.2 Coping, Mood, and HRQoL

Pearson correlation analysis was performed to examine the relationships between coping, mood, and HRQoL (see Table 2). A small and positive correlation was observed between confrontation coping and positive mood ( $r = 0.21$ ). Resigned acceptance was moderately and positively correlated with negative mood ( $r = 0.46$ ), but moderately and inversely correlated with positive mood ( $r = -0.27$ ). Use of resigned acceptance was correlated with more difficulties in mobility ( $r = -0.21$ ), self-care ( $r = -0.19$ ), usual activities ( $r = -0.19$ ), pain/discomfort ( $r = -0.19$ ), anxiety/depression ( $r = -0.41$ ), and lower EQ-5D utility index ( $r = -0.28$ ).

COPING, MOOD AND HRQOL IN LUNG CANCER PATIENTS

Table 2 Correlation among coping, affect and HRQOL

|                                | M (SD)      | 1      | 2       | 3      | 4       | 5      | 6      | 7      | 8      | 9      |
|--------------------------------|-------------|--------|---------|--------|---------|--------|--------|--------|--------|--------|
| <b>1. Confrontation</b>        | 2.37 (0.49) | 1      |         |        |         |        |        |        |        |        |
| <b>2. Resigned acceptance</b>  | 1.92 (0.62) | -0.03  | 1       |        |         |        |        |        |        |        |
| <b>3. Positive mood</b>        | 2.40 (0.76) | 0.21** | -0.27** | 1      |         |        |        |        |        |        |
| <b>4. Negative mood</b>        | 1.84 (0.76) | 0.11   | 0.46**  | -0.11  | 1       |        |        |        |        |        |
| <b>5. Mobility</b>             | 4.32 (0.99) | -0.05  | -0.21** | 0.19** | -0.28** | 1      |        |        |        |        |
| <b>6. Self-care</b>            | 4.58 (0.86) | -0.06  | -0.19** | 0.15*  | -0.28** | 0.78** | 1      |        |        |        |
| <b>7. Usual activities</b>     | 4.24 (0.97) | -0.10  | -0.19** | 0.16*  | -0.27** | 0.78** | 0.73** | 1      |        |        |
| <b>8. Pain/discomfort</b>      | 3.98 (0.87) | -0.08  | -0.19** | 0.14*  | -0.28** | 0.45** | 0.43** | 0.46** | 1      |        |
| <b>9. Anxiety/depression</b>   | 4.22 (0.73) | -0.03  | -0.41** | 0.19** | -0.50** | 0.21** | 0.21** | 0.25** | 0.27** | 1      |
| <b>10. EQ-5D utility index</b> | 0.80 (0.19) | -0.10  | -0.28** | 0.20** | -0.38** | 0.84** | 0.82** | 0.84** | 0.69** | 0.45** |

\*p<0.05, \*\*p<0.01

Scale range: Confrontation, resigned acceptance: 1 (never) – 4 (very often); Positive mood, negative mood: 1 (very slightly) – 5 (extremely); Mobility, self-care, usual activities, pain/discomfort, anxiety/depression: 1 (very severe) – 5 (no); EQ-5D utility index: -1 (worse than death) – 1 (full health)

## COPING, MOOD AND HRQOL IN LUNG CANCER PATIENTS

Hierarchical regression analyses were used to examine the relationship of confrontation and resigned acceptance coping with positive mood, negative mood, and HRQoL (see Table 3). Age, gender, cancer stage, and significant correlates of mood and/or HRQoL ( $p < 0.05$ ), including perceived cancer-related financial burden, a history of radiotherapy, and lung cancer type (poorly differentiated non-small cell, small cell, other non-small cell), were controlled in the hierarchical regression analyses. Regarding positive mood, in addition to covariates, confrontation and resigned acceptance were found to be significant factors, as confrontation was associated with higher positive mood ( $\beta = 0.19, p = 0.002$ ), whereas resigned acceptance was associated with lower positive mood ( $\beta = -0.25, p < 0.001$ ). Regarding negative mood, in addition to covariates, confrontation and resigned acceptance were significant factors, as use of confrontation ( $\beta = 0.11, p = 0.040$ ) and resigned acceptance ( $\beta = 0.44, p < 0.001$ ) were associated with higher negative mood.

Regarding the EQ-5D domain scores, after controlling sociodemographic and clinical covariates, confrontation was not associated with the domain scores, whereas resigned acceptance was inversely associated with all domains. Positive mood was associated with less difficulty in mobility, usual activities, pain/discomfort, but not associated with self-care and anxiety/depression. Negative mood was associated with more difficulty in all domains of HRQOL.

Regarding EQ-5D utility index, after controlling sociodemographic and clinical covariates, resigned acceptance was inversely associated with EQ-5D utility index ( $\beta = -0.22, p < 0.001$ ), whereas confrontation was not associated with EQ-5D utility index. Moreover, the effects of mood on EQ-5D utility index were significant, as positive mood was associated with higher EQ-5D utility index ( $\beta = 0.17, p = 0.005$ ), whereas negative mood was associated with lower EQ-5D utility index ( $\beta = -0.28, p < 0.001$ ).

## COPING, MOOD AND HRQOL IN LUNG CANCER PATIENTS

Table 3 Multiple regression results for predictors of mood and HRQOL

|                                                     | Positive mood |              | Negative mood |                  | Mobility  |              | Self-care |              | Usual activities |              | Pain / discomfort |              | Anxiety / depression |                  | EQ-5D utility index |              |
|-----------------------------------------------------|---------------|--------------|---------------|------------------|-----------|--------------|-----------|--------------|------------------|--------------|-------------------|--------------|----------------------|------------------|---------------------|--------------|
|                                                     | $\beta^f$     | <i>p</i>     | $\beta^f$     | <i>p</i>         | $\beta^f$ | <i>p</i>     | $\beta^f$ | <i>p</i>     | $\beta^f$        | <i>p</i>     | $\beta^f$         | <i>p</i>     | $\beta^f$            | <i>p</i>         | $\beta^f$           | <i>p</i>     |
| <b>Step 1</b>                                       |               |              |               |                  |           |              |           |              |                  |              |                   |              |                      |                  |                     |              |
| <b>Age</b>                                          | -0.15         | <b>0.021</b> | -0.04         | 0.53             | -0.13     | <b>0.040</b> | -0.13     | <b>0.046</b> | -0.06            | 0.31         | -0.07             | 0.25         | 0.01                 | 0.91             | -0.10               | 0.09         |
| <b>Gender <sup>a</sup></b>                          | -0.07         | 0.32         | 0.05          | 0.40             | -0.07     | 0.29         | -0.06     | 0.35         | -0.09            | 0.15         | -0.01             | 0.85         | 0.02                 | 0.76             | -0.03               | 0.68         |
| <b>Financial burden <sup>b</sup></b>                | -0.14         | <b>0.032</b> | 0.30          | <b>&lt;0.001</b> | -0.16     | <b>0.010</b> | -0.15     | <b>0.017</b> | -0.20            | <b>0.002</b> | -0.15             | <b>0.018</b> | -0.25                | <b>&lt;0.001</b> | -0.22               | <b>0.001</b> |
| <b>Cancer stage <sup>c</sup></b>                    | -0.09         | 0.16         | -0.07         | 0.22             | 0.00      | 0.99         | 0.05      | 0.46         | 0.03             | 0.67         | 0.04              | 0.58         | 0.04                 | 0.51             | 0.04                | 0.53         |
| <b>Cancer type-other non-small cell (Reference)</b> | 0             |              | 0             |                  | 0         |              | 0         |              | 0                |              | 0                 |              | 0                    |                  | 0                   |              |
| <b>Cancer type-undifferentiated <sup>d</sup></b>    | 0.01          | 0.93         | -0.03         | 0.58             | -0.07     | 0.26         | -0.08     | 0.19         | -0.12            | 0.053        | -0.08             | 0.19         | -0.04                | 0.51             | -0.14               | <b>0.027</b> |
| <b>Cancer type-small cell <sup>d</sup></b>          | -0.08         | 0.21         | -0.01         | 0.85             | 0.05      | 0.44         | 0.03      | 0.66         | 0.08             | 0.22         | 0.14              | <b>0.025</b> | 0.07                 | 0.29             | 0.10                | 0.12         |
| <b>Received radiotherapy <sup>e</sup></b>           | -0.03         | 0.63         | 0.16          | <b>0.009</b>     | -0.17     | <b>0.006</b> | -0.19     | <b>0.003</b> | -0.14            | <b>0.026</b> | -0.20             | <b>0.002</b> | -0.07                | 0.24             | -0.20               | <b>0.001</b> |
| <b><math>\Delta R^2</math></b>                      | 0.054         |              | 0.141         |                  | 0.079     |              | 0.081     |              | 0.097            |              | 0.094             |              | 0.080                |                  | 0.124               |              |
| <b>Step 2</b>                                       |               |              |               |                  |           |              |           |              |                  |              |                   |              |                      |                  |                     |              |

## COPING, MOOD AND HRQOL IN LUNG CANCER PATIENTS

|                               |       |                  |       |                  |       |              |       |              |       |              |       |              |       |                  |       |                  |
|-------------------------------|-------|------------------|-------|------------------|-------|--------------|-------|--------------|-------|--------------|-------|--------------|-------|------------------|-------|------------------|
| <b>Confrontation</b>          | 0.19  | <b>0.002</b>     | 0.11  | <b>0.040</b>     | -0.05 | 0.40         | -0.05 | 0.39         | -0.07 | 0.25         | -0.07 | 0.29         | -0.01 | 0.81             | -0.08 | 0.17             |
| <b>Resigned acceptance</b>    | -0.25 | <b>&lt;0.001</b> | 0.44  | <b>&lt;0.001</b> | -0.16 | <b>0.013</b> | -0.15 | <b>0.019</b> | -0.16 | <b>0.012</b> | -0.14 | <b>0.029</b> | -0.41 | <b>&lt;0.001</b> | -0.22 | <b>&lt;0.001</b> |
| $\Delta R^2$                  | 0.098 |                  | 0.191 |                  | 0.025 |              | 0.023 |              | 0.027 |              | 0.021 |              | 0.155 |                  | 0.053 |                  |
| <b>Step 3</b>                 |       |                  |       |                  |       |              |       |              |       |              |       |              |       |                  |       |                  |
| <b>Positive mood</b>          |       |                  |       |                  | 0.16  | <b>0.013</b> | 0.12  | 0.078        | 0.14  | <b>0.026</b> | 0.14  | <b>0.029</b> | 0.10  | 0.076            | 0.17  | <b>0.005</b>     |
| <b>Negative mood</b>          |       |                  |       |                  | -0.22 | <b>0.003</b> | -0.20 | <b>0.006</b> | -0.17 | <b>0.020</b> | -0.20 | <b>0.005</b> | -0.36 | <b>&lt;0.001</b> | -0.28 | <b>&lt;0.001</b> |
| $\Delta R^2$                  |       |                  |       |                  | 0.053 |              | 0.039 |              | 0.036 |              | 0.044 |              | 0.093 |                  | 0.076 |                  |
| <b>Adjusted R<sup>2</sup></b> | 0.120 |                  | 0.307 |                  | 0.118 |              | 0.103 |              | 0.122 |              | 0.121 |              | 0.298 |                  | 0.218 |                  |

Note. a. 0=Male, 1=Female; b. range:1 (no difficulty) – 5 (very much); c. 1=stage III, 2=stage IV; d. other non-small cell lung cancers was the reference group; e. 0=No, 1=Yes; f. standardized coefficients

### 3.3 Mediating Effect of Mood on the Association between Coping and HRQoL

The MEDIANTE macro was used to examine the mediating effect of mood in the relationship between coping and HRQoL, controlling for age, gender, cancer stage, perceived cancer-related financial burden, history of radiotherapy, and lung cancer type (poorly differentiated non-small cell, small cell, other non-small cell). The indirect effect (ab) was estimated as the product of regression coefficients predicting mood from each coping strategy (a), and HRQoL from mood (b) (see Figure 1). Bootstrapping techniques using 5000 samples revealed significant indirect effects for confrontation and resigned acceptance on HRQoL through positive and negative mood, respectively. The results are presented in Table 4.

Although the total effects of confrontation on EQ-5D domains scores and utility index were not significant, competing indirect effects via mood were identified. On one hand, positive indirect effects were found for confrontation on mobility (point estimate = 0.06,  $SE = 0.03$ , 95% CI [0.01, 0.13]), usual activities (point estimate = 0.05,  $SE = 0.03$ , 95% CI [0.01, 0.12]), pain/discomfort (point estimate = 0.05,  $SE = 0.03$ , 95% CI [0.004, 0.11]), and overall utility index (point estimate = 0.01,  $SE = 0.01$ , 95% CI [0.003, 0.03]) through positive mood. On the other hand, negative indirect effects were found for confrontation on mobility (point estimate = -0.05,  $SE = 0.03$ , 95% CI [-0.12, -0.002]), pain/discomfort (point estimate = -0.04,  $SE = 0.02$ , 95% CI [-0.10, -0.001]), anxiety/depression (point estimate = -0.06,  $SE = 0.03$ , 95% CI [-0.13, -0.003]), and overall utility index (point estimate = -0.01,  $SE = 0.01$ , 95% CI [-0.03, -0.001]) through negative mood. The direct effects of confrontation on EQ-5D domains scores and utility index were not significant.

Resigned acceptance has a significant negative total effect on EQ-5D domains scores and utility index. Furthermore, indirect effects of resigned acceptance on HRQoL via positive and negative mood were identified. Use of resigned acceptance was associated with decrease

## COPING, MOOD AND HRQOL IN LUNG CANCER PATIENTS

1  
2  
3 in positive mood, and increase in negative mood, which could lead to more difficulty in  
4  
5 mobility, self-care, usual activities, pain/discomfort, anxiety/depression, and overall utility  
6  
7 index (indirect effect via positive mood: point estimate = -0.01, *SE* = 0.01, 95% CI [-0.03, -  
8  
9 0.003]; indirect effect via negative mood: point estimate = -0.04, *SE* = 0.01, 95% CI [-0.06, -  
10  
11 0.02]).  
12  
13  
14  
15  
16  
17  
18  
19  
20  
21  
22  
23  
24  
25  
26  
27  
28  
29  
30  
31  
32  
33  
34  
35  
36  
37  
38  
39  
40  
41  
42  
43  
44  
45  
46  
47  
48  
49  
50  
51  
52  
53  
54  
55  
56  
57  
58  
59  
60

For peer review only



COPING, MOOD AND HRQOL IN LUNG CANCER PATIENTS

Table 4 Mediation model testing the direct and indirect effect of coping on HRQOL via mood

| Outcome          | Predictor           | Mediator      | Path a          | Path b          | Path ab: indirect effect of coping on HRQOL |                 | Path c': Direct effect of coping on HRQOL | Path c: Total effect of coping on HRQOL |
|------------------|---------------------|---------------|-----------------|-----------------|---------------------------------------------|-----------------|-------------------------------------------|-----------------------------------------|
|                  |                     |               | coef (se)       | coef (se)       | coef (se)                                   | 95% CI          | coef (se )                                | coef (se)                               |
| HRQOL            | Confrontation       | Positive mood | 0.30** (0.09)   | 0.04** (0.01)   | 0.01 (0.01)                                 | [0.003, 0.03]   | -0.03 (0.02)                              | -0.03 (0.02)                            |
|                  |                     | Negative mood | 0.17* (0.08)    | -0.07*** (0.02) | -0.01 (0.01)                                | [-0.03, -0.001] |                                           |                                         |
|                  | Resigned acceptance | Positive mood | -0.31*** (0.08) |                 | -0.01 (0.01)                                | [-0.03, -0.003] | -0.02 (0.02)                              | -0.07*** (0.02)                         |
|                  |                     | Negative mood | 0.54*** (0.07)  |                 | -0.04 (0.01)                                | [-0.06, -0.02]  |                                           |                                         |
| Mobility         | Confrontation       | Positive mood | 0.30** (0.09)   | 0.21* (0.08)    | 0.06 (0.03)                                 | [0.01, 0.13]    | -0.12 (0.13)                              | -0.10 (0.12)                            |
|                  |                     | Negative mood | 0.17* (0.08)    | -0.28** (0.09)  | -0.05 (0.03)                                | [-0.12, -0.002] |                                           |                                         |
|                  | Resigned acceptance | Positive mood | -0.31*** (0.08) |                 | -0.06 (0.03)                                | [-0.13, -0.01]  | -0.03 (0.11)                              | -0.25* (0.10)                           |
|                  |                     | Negative mood | 0.54*** (0.07)  |                 | -0.15 (0.06)                                | [-0.27, -0.05]  |                                           |                                         |
| Self-care        | Confrontation       | Positive mood | 0.30** (0.09)   | 0.13 (0.07)     | 0.04 (0.03)                                 | [-0.003, 0.10]  | -0.09 (0.11)                              | -0.09 (0.11)                            |
|                  |                     | Negative mood | 0.17* (0.08)    | -0.23** (0.08)  | -0.04 (0.03)                                | [-0.10, 0.002]  |                                           |                                         |
|                  | Resigned acceptance | Positive mood | -0.31*** (0.08) |                 | -0.04 (0.03)                                | [-0.10, -0.003] | -0.04 (0.10)                              | -0.21* (0.09)                           |
|                  |                     | Negative mood | 0.54*** (0.07)  |                 | -0.14 (0.05)                                | [-0.24, -0.05]  |                                           |                                         |
| Usual Activities | Confrontation       | Positive mood | 0.30** (0.09)   | 0.18* (0.08)    | 0.05 (0.03)                                 | [0.01, 0.12]    | -0.16 (0.12)                              | -0.14 (0.12)                            |
|                  |                     | Negative mood | 0.17* (0.08)    | -0.22* (0.09)   | -0.04 (0.02)                                | [-0.09, 0.001]  |                                           |                                         |
|                  | Resigned acceptance | Positive mood | -0.31*** (0.08) |                 | -0.06 (0.03)                                | [-0.12, -0.01]  | -0.07 (0.11)                              | -0.25* (0.10)                           |
|                  |                     | Negative mood | 0.54*** (0.07)  |                 | -0.12 (0.05)                                | [-0.22, -0.02]  |                                           |                                         |

## COPING, MOOD AND HRQOL IN LUNG CANCER PATIENTS

|                             |                     |                 |                 |                 |                |                 |                 |               |
|-----------------------------|---------------------|-----------------|-----------------|-----------------|----------------|-----------------|-----------------|---------------|
| <b>Pain / Discomfort</b>    | Confrontation       | Positive mood   | 0.30** (0.09)   | 0.16* (0.07)    | 0.05 (0.03)    | [0.004, 0.11]   | -0.12 (0.11)    | -0.12 (0.11)  |
|                             |                     | Negative mood   | 0.17* (0.08)    | -0.23** (0.08)  | -0.04 (0.02)   | [-0.10, -0.001] |                 |               |
| <b>Anxiety / Depression</b> | Resigned acceptance | Positive mood   | -0.31*** (0.08) |                 | -0.05 (0.03)   | [-0.11, -0.005] | -0.02 (0.10)    | -0.19* (0.09) |
|                             |                     | Negative mood   | 0.54*** (0.07)  |                 | -0.13 (0.05)   | [-0.23, -0.04]  |                 |               |
|                             | Confrontation       | Positive mood   | 0.30** (0.09)   | 0.10 (0.05)     | 0.03 (0.02)    | [-0.003, 0.74]  | 0.01 (0.08)     | -0.02 (0.08)  |
|                             |                     | Negative mood   | 0.17* (0.08)    | -0.34*** (0.06) | -0.06 (0.03)   | [-0.13, -0.003] |                 |               |
| Resigned acceptance         | Positive mood       | -0.31*** (0.08) |                 | -0.03 (0.02)    | [-0.07, 0.003] | -0.26** (0.07)  | -0.48*** (0.07) |               |
|                             | Negative mood       | 0.54*** (0.07)  |                 | -0.18 (0.04)    | [-0.27, -0.11] |                 |                 |               |

Note. Age, gender, financial burden, disease stage, lung cancer type, and history of radiotherapy were controlled in the mediation model. All coefficients (a, b, c', c) were unstandardized coefficients. \* $p < 0.05$ , \*\* $p < 0.01$ , \*\*\*  $p < 0.001$

#### 4. Discussion

To our knowledge, this is the first study to examine the relationship between coping, positive and negative mood, and HRQoL and the mediating role of mood in the relationship between coping and HRQoL among patients with advanced cancer. The findings of this study indicate that examining the pathway via positive and negative mood can generate a new understanding of the effect of coping on HRQoL among patients with advanced lung cancer, regardless of sociodemographic and clinical factors. The confrontation coping strategy was not directly associated with domains of HRQoL or overall HRQoL, but two significant indirect pathways via mood were identified. On one hand, confrontation had positive indirect effects on mobility, usual activities, pain, and overall HRQoL via positive mood; On the other hand, confrontation had negative indirect effects on mobility, pain, anxiety, and overall HRQoL via negative mood; Positive and negative indirect effect could counteract, resulting in a nonsignificant total effect. In contrast, use of resigned acceptance coping was associated with an increase in negative mood and a decrease in positive mood, which could in turn result in more difficulty in mobility, self-care, usual activities, pain, and poor overall HRQoL. On the whole, this is a unique finding that indicates the ambivalence of confrontation and the maladaptive nature of resigned acceptance among patients with advanced lung cancer.

The mean EQ-5D utility index in the current study was found to be 0.80, which was comparable to a study among patients with advanced non-small cell lung cancer in China with a utility index of 0.81 [51]. Consistent with previous studies, patients perceiving higher financial burden were more likely to report poor HRQoL compared to those perceiving lower financial burden related to cancer [11, 52]. Financial burden may restrict access to some drugs and treatment [52], and it may also lead to a sense of guilt for relying on families [29], which may affect health outcomes.

## COPING, MOOD AND HRQOL IN LUNG CANCER PATIENTS

1  
2  
3 The current findings support the theory of stress and coping in the context of  
4 advanced cancer by indicating that coping can play a role in adapting to the experience of  
5 lung cancer, which could in turn influence emotional and health outcomes [36, 37]. The  
6 current study is in line with previous studies indicating that resigned acceptance was  
7 associated with less favorable outcomes [21, 26]. Resigned acceptance is related to the  
8 fatalistic attitude toward illness in traditional Taoist beliefs [28]. Giving up control in the  
9 actual situation, or even other aspects of life and holding negative expectations about the  
10 future could be associated with low levels of positive mood, and increase negative mood,  
11 which contribute to poor health outcomes in patients with advanced cancer.  
12  
13  
14  
15  
16  
17  
18  
19  
20  
21  
22  
23

24 Confrontation was found to be associated with increased positive and negative mood.  
25 In the current study, confrontation was characterized by attempts such as seeking information  
26 and support from various sources and being involved in decision making. Through such  
27 efforts, patients may regain a sense of control and redirect energy to constructive actions  
28 during treatment and daily living, which might facilitate the occurrence of positive mood.  
29 However, it is also possible that individuals could encounter various stressful decisions and  
30 pieces of information when they actively confront the advanced disease, which might lead to  
31 negative mood.  
32  
33  
34  
35  
36  
37  
38  
39  
40  
41  
42  
43

44 Our findings are in line with other studies reporting a nonsignificant association  
45 between confrontation and HRQoL among cancer patients [14, 21, 22]. Particularly, the  
46 findings on the mediating role of mood can help clarify the mechanisms underlying the  
47 nonsignificant association. The coexisting positive and negative indirect effect via mood  
48 could counteract one another, resulting in a null, or weak, total effect of confrontation on  
49 HRQoL. The ambivalence of confrontation may also reflect the effect of fighting attitude  
50 towards life-threatening illness in Chinese population, in which the patients and their families  
51 would seek, try, and continue available curative treatments to sustain and prolong life. Even  
52  
53  
54  
55  
56  
57  
58  
59  
60

## COPING, MOOD AND HRQOL IN LUNG CANCER PATIENTS

1  
2  
3 though actively confronting the advanced cancer may have some benefits (e.g., sense of  
4 control, constructive actions and skills), it may also remind patients of the potential incurable  
5 nature of advanced cancer and increase distress.  
6  
7  
8  
9

10 This study indicated that mood can be a pathway between coping and health  
11 outcomes. One explanation is related to physiology of mood [53], as positive and negative  
12 mood are associated with physiological levels in different directions, which can lead to  
13 different health outcomes. The second explanation is related to thought-action repertoires  
14 [43]. Negative mood is suggested to narrow the thought-action repertoires and increase  
15 unhealthy lifestyle and social isolation [43, 54], which could result in poor health outcomes.  
16 In contrast, positive affect is suggested to broaden the scope of attention and thought-action  
17 repertoires and build up personal and social resources [43], which could be beneficial to  
18 health outcomes. The third explanation is related to attributional interpretation [33]. HRQoL  
19 refers to a self-perceived health status, and it is possible that participants in a negative mood  
20 tend to perceive lower health status (more difficulties in daily living and symptoms) than  
21 those in a positive mood.  
22  
23  
24  
25  
26  
27  
28  
29  
30  
31  
32  
33  
34  
35  
36  
37  
38

39 This study has some limitations. First, causality on the relationships between coping,  
40 mood, and HRQoL could not be drawn out from this cross-sectional study. Secondly,  
41 although Medical Coping Modes Questionnaire measured three coping strategies (i.e.,  
42 confrontation, acceptance-resignation, avoidance), reliability of avoidance, indicated by  
43 Cronbach'  $\alpha$  coefficient, was low in the current study. This restricted us from analyzing the  
44 effect of the avoidance strategy. Thirdly, the PANAS mostly measured the high-activated  
45 positive and negative affect [55]. Further study is suggested to investigate the relationship  
46 between resigned acceptance and low-activated mood (e.g., peace, calm). Fourthly, although  
47 EuroQol 5-dimension was used to measure HRQoL among patients with advanced cancer in  
48 a range of studies [51, 56], the measurement properties of the instrument is needed to be  
49  
50  
51  
52  
53  
54  
55  
56  
57  
58  
59  
60

## COPING, MOOD AND HRQOL IN LUNG CANCER PATIENTS

1  
2  
3 examined further in patients with advanced cancer [57]. Finally, the sample was recruited  
4  
5 from one hospital in China, which could compromise the generalizability of the findings.  
6  
7

8 Our finding that coping strategies is associated with mood and quality of life suggest  
9 that oncology providers need to pay attention to how patients are coping with the advanced  
10 cancer. Despite fostering realistic expectation for treatment and prognosis, oncology  
11 providers should watch for resigned acceptance and help the patients to learn what they can  
12 still do to regain a sense of control. On the other hand, when patients are engaging in  
13 excessive information- or treatment-seeking behaviors (i.e., part of confrontation), oncology  
14 providers should be aware that if it might a signal of underlying anxiety and make sure  
15 patients have appropriate mental health care and support. Mental health providers may help  
16 to address coping, mood, and quality of life through evidence-based interventions for  
17 advanced cancer patients. For instance, Acceptance and Commitment Therapy is indicated to  
18 reduce emotional distress and improve quality of life by facilitating the active acceptance of  
19 unpleasant thoughts and feelings in cancer patients [58, 59], which may a worthwhile  
20 approach. Finally, Early palliative care is a comprehensive, multidisciplinary, evidence-based  
21 approach for improving quality of life, which may be integrated into standard oncology care  
22 for patients with advanced cancer [60].  
23  
24  
25  
26  
27  
28  
29  
30  
31  
32  
33  
34  
35  
36  
37  
38  
39  
40  
41  
42  
43

44 **Figure 1** Positive and negative mood as mediators of the association between coping and  
45 HRQoL  
46  
47

#### 48 **Acknowledgements**

49 The authors thank all the participants for their involvement, and all healthcare workers for  
50 their kind support in the study.  
51  
52  
53  
54  
55  
56

#### 57 **Contributors**

## COPING, MOOD AND HRQOL IN LUNG CANCER PATIENTS

1  
2  
3 HY, JH, LV, CJ designed the study. HY, JH, YM, ZJ, and LG collected data. HY and CJ  
4  
5 analyzed the data. HY and CJ drafted the manuscript. HY, JH, YM, ZJ, LG, LV, CJ revised  
6  
7 the manuscript.  
8  
9

**Funding**

10  
11  
12  
13 The study is supported by Shanghai Municipal Health Bureau Foundation (No. 201740116),  
14  
15 National Natural Science Foundation of China (No. 71874111), School of Medicine of  
16  
17 Shanghai Jiao Tong University Core Education Project (No. ZD150603), The Fourth Round  
18  
19 of Three-year Action Plan on Public Health Discipline and Talent Program: Evidence-based  
20  
21 Public Health and Health Economics (No.15GWZK0901)  
22  
23  
24  
25

**Competing interests**

26  
27  
28 The authors declare that they have no conflict of interest.  
29  
30  
31

**Patient consent**

32  
33  
34  
35 Obtained.  
36  
37

**Data sharing statement**

38  
39  
40  
41 No additional data were available.  
42  
43

**References**

- 44  
45  
46  
47 1. Chen WQ, Zheng RS, Baade PD et al. Cancer Statistics in China, 2015. *Ca-a Cancer*  
48 *Journal for Clinicians* 2016; 66: 115-132.  
49  
50 2. Stewart B, Wild CP. *World cancer report 2014*. Health 2017.  
51  
52 3. Ma YX, Yang YP, Huang Y et al. An investigation of symptom burden and quality of  
53 life in Chinese chemo-naïve advanced lung cancer patients by using the Instrument-Cloud  
54 QOL System. *Lung Cancer* 2014; 84: 301-306.  
55  
56 4. Schmidt K, Damm K, Prenzler A et al. Preferences of lung cancer patients for  
57 treatment and decision-making: a systematic literature review. *European Journal of Cancer*  
58 *Care* 2016; 25: 580-591.  
59  
60 5. Huang H-Y, Shi J-F, Guo L-W et al. Expenditure and financial burden for common  
cancers in China: a hospital-based multicentre cross-sectional study. *The Lancet* 2016; 388:  
S10.

## COPING, MOOD AND HRQOL IN LUNG CANCER PATIENTS

6. Chouaid C, Agulnik J, Goker E et al. Health-Related Quality of Life and Utility in Patients with Advanced Non-Small-Cell Lung Cancer: A Prospective Cross-Sectional Patient Survey in a Real-World Setting. *Journal of Thoracic Oncology* 2013; 8: 997-1003.
7. Zeng HM, Zheng RS, Guo YM et al. Cancer survival in China, 2003-2005: A population-based study. *International Journal of Cancer* 2015; 136: 1921-1930.
8. Gupta D, Braun DP, Staren ED. Association between changes in quality of life scores and survival in non-small cell lung cancer patients. *European Journal of Cancer Care* 2012; 21: 614-622.
9. Maione P, Perrone F, Gallo C et al. Pretreatment quality of life and functional status assessment significantly predict survival of elderly patients with advanced non-small-cell lung cancer receiving chemotherapy: A prognostic analysis of the Multicenter Italian Lung Cancer in the Elderly Study. *Journal of Clinical Oncology* 2005; 23: 6865-6872.
10. Polanski J, Jankowska-Polanska B, Rosinczuk J et al. Quality of life of patients with lung cancer. *Oncotargets and Therapy* 2016; 9: 1023-1028.
11. Chen JE, Lou VW, Jian H et al. Objective and subjective financial burden and its associations with health-related quality of life among lung cancer patients. *Supportive Care in Cancer* 2018; 26: 1265-1272.
12. Mosher CE, Ott MA, Hanna N et al. Coping with physical and psychological symptoms: a qualitative study of advanced lung cancer patients and their family caregivers. *Supportive Care in Cancer* 2015; 23: 2053-2060.
13. Nipp RD, Greer JA, El-Jawahri A et al. Coping and Prognostic Awareness in Patients With Advanced Cancer. *Journal of Clinical Oncology* 2017; 35: 2551-+.
14. Nipp RD, El-Jawahri A, Fishbein JN et al. The relationship between coping strategies, quality of life, and mood in patients with incurable cancer. *Cancer* 2016; 122: 2110-2116.
15. Feifel H, Strack S, Nagy VT. Coping strategies and associated features of medically ill patients. *Psychosomatic Medicine* 1987; 49: 616-625.
16. Ma YM, Ba CF, Wang YB. Analysis of factors affecting the life quality of the patients with late stomach cancer. *Journal of Clinical Nursing* 2014; 23: 1257-1262.
17. Wu XD, Qin HY, Zhang JE et al. The prevalence and correlates of symptom distress and quality of life in Chinese oesophageal cancer patients undergoing chemotherapy after radical oesophagectomy. *European Journal of Oncology Nursing* 2015; 19: 502-508.
18. Hong JF, Wei ZZ, Wang WL. Preoperative psychological distress, coping and quality of life in Chinese patients with newly diagnosed gastric cancer. *Journal of Clinical Nursing* 2015; 24: 2439-2447.
19. van Laarhoven HWM, Schilderman J, Bleijenberg G et al. Coping, Quality of Life, Depression, and Hopelessness in Cancer Patients in a Curative and Palliative, End-of-Life Care Setting. *Cancer Nursing* 2011; 34: 302-314.
20. Sorato DB, Osorio FL. Coping, psychopathology, and quality of life in cancer patients under palliative care. *Palliative & Supportive Care* 2015; 13: 517-525.
21. Xu L, Pan QO, Lin RQ. Prevalence rate and influencing factors of preoperative anxiety and depression in gastric cancer patients in China: Preliminary study. *Journal of International Medical Research* 2016; 44: 377-388.
22. He GP, Liu S. Quality of life and coping styles in Chinese nasopharyngeal cancer patients after hospitalization. *Cancer Nursing* 2005; 28: 179-186.
23. Nakamura YM, Orth U. Acceptance as a coping reaction: adaptive or not? *Swiss Journal of Psychology* 2005; 64: 281-292.



## COPING, MOOD AND HRQOL IN LUNG CANCER PATIENTS

24. Feifel H, Strack S, Nagy VT. Degree of life-threat and differential use of coping modes. *Journal of Psychosomatic Research* 1987; 31: 91-99.
25. Hayes SC, Luoma JB, Bond FW et al. Acceptance and commitment therapy: Model, processes and outcomes. *Behaviour Research and Therapy* 2006; 44: 1-25.
26. Hack TF, Degner LF. Coping responses following breast cancer diagnosis predict psychological adjustment three years later. *Psycho-Oncology* 2004; 13: 235-247.
27. Yeung NCY, Lu Q. Affect mediates the association between mental adjustment styles and quality of life among Chinese cancer survivors. *Journal of Health Psychology* 2014; 19: 1420-1429.
28. Goss PE, Strasser-Weippl K, Lee-Bychkovsky BL et al. Challenges to effective cancer control in China, India, and Russia. *Lancet Oncology* 2014; 15: 489-538.
29. Chen H, Komaromy C, Valentine C. From hope to hope: The experience of older Chinese people with advanced cancer. *Health* 2015; 19: 154-171.
30. Bai Q, Zhang ZG, Lu XQ et al. Attitudes towards palliative care among patients and health professionals in Henan, China. *Progress in Palliative Care* 2010; 18: 341-345.
31. Park CL, Iacocca MO. A stress and coping perspective on health behaviors: theoretical and methodological considerations. *Anxiety, Stress, & Coping* 2014; 27: 123-137.
32. Drach-Zahavy A, Somech A. Coping with health problems: the distinctive relationships of Hope sub-scales with constructive thinking and resource allocation. *Personality and Individual Differences* 2002; 33: 103-117.
33. Billings DW, Folkman S, Acree M, Moskowitz JT. Coping and physical health during caregiving: The roles of positive and negative affect. *Journal of Personality and Social Psychology* 2000; 79: 131-142.
34. Katter JKQ, Greenglass E. The Influence of Mood on the Relation between Proactive Coping and Rehabilitation Outcomes. *Canadian Journal on Aging-Revue Canadienne Du Vieillessement* 2013; 32: 13-20.
35. Rueda B, Perez-Garcia AM. Coping strategies, depressive symptoms and quality of life in hypertensive patients: Mediatlional and prospective relations. *Psychology & Health* 2013; 28: 1152-1170.
36. Folkman S, Greer S. Promoting psychological well-being in the face of serious illness: When theory, research and practice inform each other. *Psycho-Oncology* 2000; 9: 11-19.
37. Roberts D, Calman L, Large P et al. A revised model for coping with advanced cancer. Mapping concepts from a longitudinal qualitative study of patients and carers coping with advanced cancer onto Folkman and Greer's theoretical model of appraisal and coping. *Psycho-Oncology* 2018; 27: 229-235.
38. Hirsch JK, Floyd AR, Duberstein PR. Perceived health in lung cancer patients: the role of positive and negative affect. *Quality of Life Research* 2012; 21: 187-194.
39. Weitzner MA, Meyers CA, Stuebing KK, Saleeba AK. Relationship between quality of life and mood in long-term survivors of breast cancer treated with mastectomy. *Supportive Care in Cancer* 1997; 5: 241-248.
40. Stellar JE, John-Henderson N, Anderson CL et al. Positive Affect and Markers of Inflammation: Discrete Positive Emotions Predict Lower Levels of Inflammatory Cytokines. *Emotion* 2015; 15: 129-133.
41. Messay B, Lim A, Marsland AL. Current understanding of the bi-directional relationship of major depression with inflammation. *Biology of Mood & Anxiety Disorders* 2012; 2.

## COPING, MOOD AND HRQOL IN LUNG CANCER PATIENTS

42. Fredrickson BL. The broaden-and-build theory of positive emotions. *Philosophical Transactions of the Royal Society of London Series B-Biological Sciences* 2004; 359: 1367-1377.
43. Garland EL, Fredrickson B, Kring AM et al. Upward spirals of positive emotions counter downward spirals of negativity: Insights from the broaden-and-build theory and affective neuroscience on the treatment of emotion dysfunctions and deficits in psychopathology. *Clinical Psychology Review* 2010; 30: 849-864.
44. Raijmakers NJH, Zijlstra M, van Roij J et al. Health-related quality of life among cancer patients in their last year of life: results from the PROFILES registry. *Supportive Care in Cancer* 2018.
45. Luo N, Li MH, Liu GG et al. Developing the Chinese version of the new 5-level EQ-5D descriptive system: the response scaling approach. *Quality of Life Research* 2013; 22: 885-890.
46. Feng Y, Devlin N, Shah K et al. New methods for modelling EQ-5D-5L value sets: an application to English data. 2016.
47. Deng MH, Lan YH, Luo SL. Quality of life estimate in stomach, colon, and rectal cancer patients in a hospital in China. *Tumor Biology* 2013; 34: 2809-2815.
48. Watson D, Clark LA, Tellegen A. Development and validation of brief measures of positive and negative affect-The PANAS scales. *Journal of Personality and Social Psychology* 1988; 54: 1063-1070.
49. Preacher KJ, Hayes AF. Asymptotic and resampling strategies for assessing and comparing indirect effects in multiple mediator models. *Behavior research methods* 2008; 40: 879-891.
50. Schoemann AM, Boulton AJ, Short SD. Determining Power and Sample Size for Simple and Complex Mediation Models. *Social Psychological and Personality Science* 2017; 8: 379-386.
51. Shen YJ, Wu B, Wang XH, Zhu J. Health state utilities in patients with advanced non-small-cell lung cancer in China. *Journal of Comparative Effectiveness Research* 2018; 7: 443-452.
52. Perrone F, Jommi C, Di Maio M et al. The association of financial difficulties with clinical outcomes in cancer patients: secondary analysis of 16 academic prospective clinical trials conducted in Italy. *Annals of Oncology* 2016; 27: 2224-2229.
53. Trudel-Fitzgerald C, Qureshi F, Appleton AA, Kubzansky LD. A healthy mix of emotions: underlying biological pathways linking emotions to physical health. *Current Opinion in Behavioral Sciences* 2017; 15: 16-21.
54. Walker MS, Larsen RJ, Zona DM et al. Smoking urges and relapse among lung cancer patients: findings from a preliminary retrospective study. *Preventive Medicine* 2004; 39: 449-457.
55. Russell JA. A circumplex model of affect. *Journal of Personality and Social Psychology* 1980; 39: 1161-1178.
56. Chouaid C, Agulnik J, Goker E et al. Health-Related Quality of Life and Utility in Patients with Advanced Non-Small-Cell Lung Cancer: A Prospective Cross-Sectional Patient Survey in a Real-World Setting. *Journal of Thoracic Oncology* 2013; 8: 997-1003.
57. van Roij J, Fransen H, van de Poll-Franse L et al. Measuring health-related quality of life in patients with advanced cancer: a systematic review of self-administered measurement instruments. *Quality of Life Research* 2018; 27: 1937-1955.

## COPING, MOOD AND HRQOL IN LUNG CANCER PATIENTS

- 1  
2  
3 58. Rost AD, Wilson K, Buchanan E et al. Improving Psychological Adjustment Among  
4 Late-Stage Ovarian Cancer Patients: Examining the Role of Avoidance in Treatment.  
5 Cognitive and Behavioral Practice 2012; 19: 508-517.  
6  
7 59. Feros DL, Lane L, Ciarrochi J, Blackledge JT. Acceptance and Commitment Therapy  
8 (ACT) for improving the lives of cancer patients: a preliminary study. Psycho-Oncology 2013;  
9 22: 459-464.  
10  
11 60. Greer JA, Jacobs JM, El-Jawahri A et al. Role of Patient Coping Strategies in  
12 Understanding the Effects of Early Palliative Care on Quality of Life and Mood. Journal of  
13 Clinical Oncology 2018; 36: 53-60.  
14  
15  
16  
17  
18  
19  
20  
21  
22  
23  
24  
25  
26  
27  
28  
29  
30  
31  
32  
33  
34  
35  
36  
37  
38  
39  
40  
41  
42  
43  
44  
45  
46  
47  
48  
49  
50  
51  
52  
53  
54  
55  
56  
57  
58  
59  
60

For peer review only

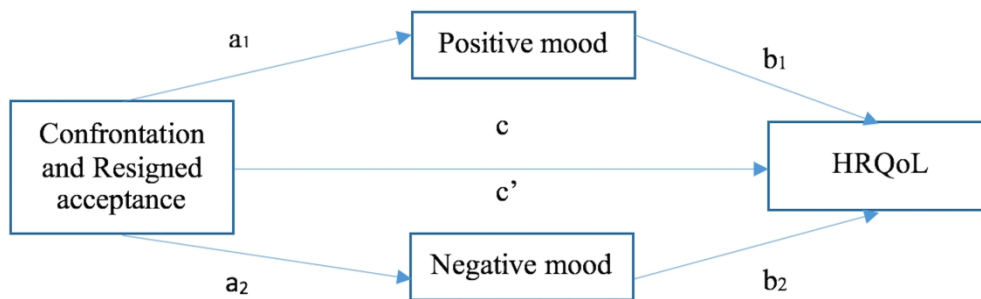

Positive and negative mood as mediators of the association between coping and HRQoL

Table 1 Mood and Health-related Quality of Life by Socio-demographic and Clinical Characteristics

| Variables                                        | M(SD) / n (%) | Positive mood | Negative mood | Mobility    | Self-care   | Usual activities | Pain/discomfort | Anxiety/depression | EQ-5D utility index |
|--------------------------------------------------|---------------|---------------|---------------|-------------|-------------|------------------|-----------------|--------------------|---------------------|
| <b>Age (years)</b>                               | 59.99 (9.53)  |               |               |             |             |                  |                 |                    |                     |
| <b>Gender</b>                                    |               |               |               |             |             |                  |                 |                    |                     |
| Male                                             | 183 (70.1%)   | 2.41 (0.75)   | 1.80 (0.73)   | 4.39 (0.95) | 4.63 (0.79) | 4.33 (0.92)      | 4.03 (0.87)     | 4.24 (0.75)        | 0.81 (0.17)         |
| Female                                           | 78 (29.9%)    | 2.34 (0.78)   | 1.93 (0.83)   | 4.21 (1.04) | 4.50 (0.96) | 4.06 (1.05)      | 3.91 (0.87)     | 4.21 (0.65)        | 0.78 (0.21)         |
| <b>Education</b>                                 |               |               |               |             |             |                  |                 |                    |                     |
| Elementary school or lower                       | 55 (21.1%)    | 2.28 (0.79)   | 1.82 (0.73)   | 4.54 (0.92) | 4.64 (0.80) | 4.31 (0.96)      | 3.98 (0.91)     | 4.11 (0.74)        | 0.80 (0.18)         |
| Middle school                                    | 91 (34.9%)    | 2.35 (0.69)   | 1.94 (0.79)   | 4.24 (0.96) | 4.57 (0.86) | 4.14 (1.04)      | 3.90 (0.87)     | 4.16 (0.79)        | 0.78 (0.19)         |
| High school                                      | 66 (25.3%)    | 2.46 (0.77)   | 1.71 (0.63)   | 4.32 (1.08) | 4.59 (0.89) | 4.29 (0.96)      | 4.05 (0.79)     | 4.32 (0.66)        | 0.82 (0.17)         |
| College or higher                                | 49 (18.8%)    | 2.51 (0.84)   | 1.83 (0.88)   | 4.41 (0.96) | 4.59 (0.84) | 4.35 (0.86)      | 4.10 (0.94)     | 4.35 (0.63)        | 0.83 (0.20)         |
| <b>Marital status</b>                            |               |               |               |             |             |                  |                 |                    |                     |
| Married                                          | 247 (94.6%)   | 2.40 (0.77)   | 1.83 (0.76)   | 4.34 (0.98) | 4.60 (0.85) | 4.25 (0.98)      | 3.98 (0.89)     | 4.23 (0.71)        | 0.80 (0.19)         |
| Single/divorced/<br>widowed                      | 14 (5.4%)     | 2.23 (0.58)   | 1.86 (0.82)   | 4.21 (1.05) | 4.57 (0.85) | 4.29 (0.83)      | 4.21 (0.58)     | 4.07 (1.00)        | 0.78 (0.18)         |
| <b>Perceived cancer-related financial burden</b> |               |               |               |             |             |                  |                 |                    |                     |
| None                                             | 37 (14.2%)    | 2.72 (0.89)   | 1.47 (0.50)   | 4.86 (0.42) | 4.92 (0.28) | 4.81 (0.46)      | 4.51 (0.56)     | 4.59 (0.50)        | 0.92 (0.08)         |
| Slight                                           | 100 (38.3%)   | 2.27 (0.74)   | 1.74 (0.63)   | 4.21 (1.09) | 4.54 (0.88) | 4.23 (0.91)      | 3.91 (0.79)     | 4.22 (0.56)        | 0.78 (0.19)         |
| Moderate                                         | 63 (24.1%)    | 2.53 (0.80)   | 1.87 (0.74)   | 4.43 (0.86) | 4.65 (0.79) | 4.17 (0.98)      | 3.90 (0.93)     | 4.27 (0.70)        | 0.80 (0.18)         |
| Severe                                           | 36 (13.8%)    | 2.16 (0.51)   | 1.94 (0.84)   | 4.25 (0.77) | 4.64 (0.68) | 4.22 (0.90)      | 4.06 (1.01)     | 4.19 (0.71)        | 0.82 (0.14)         |
| Very Severe                                      | 25 (9.6%)     | 2.38 (0.62)   | 2.52 (1.02)   | 3.96 (1.34) | 4.12 (1.33) | 3.76 (1.42)      | 3.68 (0.95)     | 3.64 (1.19)        | 0.68 (0.26)         |
| <b>Time since diagnosis<sup>a</sup></b>          |               |               |               |             |             |                  |                 |                    |                     |
| Less than 6 months                               | 144 (55.2%)   | 2.38 (0.77)   | 1.84 (0.77)   | 4.40 (0.96) | 4.60 (0.84) | 4.24 (1.02)      | 3.95 (0.90)     | 4.19 (0.76)        | 0.80 (0.19)         |
| 6-12months                                       | 32 (12.3%)    | 2.54 (0.68)   | 1.91 (0.72)   | 4.19 (1.28) | 4.50 (1.05) | 4.19 (1.12)      | 4.19 (0.78)     | 4.19 (0.82)        | 0.79 (0.23)         |
| 12-24 months                                     | 31 (11.9%)    | 2.54 (0.87)   | 1.71 (0.75)   | 4.35 (0.80) | 4.71 (0.53) | 4.42 (0.62)      | 3.97 (0.71)     | 4.32 (0.65)        | 0.83 (0.11)         |

|    |                                     |             |             |             |             |             |             |             |             |             |
|----|-------------------------------------|-------------|-------------|-------------|-------------|-------------|-------------|-------------|-------------|-------------|
| 1  |                                     |             |             |             |             |             |             |             |             |             |
| 2  |                                     |             |             |             |             |             |             |             |             |             |
| 3  | More than 24                        | 46 (17.6%)  | 2.25 (0.72) | 1.86 (0.75) | 4.17 (1.00) | 4.48 (0.96) | 4.17 (0.93) | 3.91 (0.96) | 4.26 (0.61) | 0.78 (0.20) |
| 4  | months                              |             |             |             |             |             |             |             |             |             |
| 5  | <b>Stage</b>                        |             |             |             |             |             |             |             |             |             |
| 6  | III                                 | 82 (31.4%)  | 2.50 (0.71) | 1.96 (0.90) | 4.35 (0.93) | 4.55 (0.86) | 4.20 (1.09) | 3.95 (0.94) | 4.13 (0.78) | 0.79 (0.19) |
| 7  | IV                                  | 179 (68.6%) | 2.34 (0.78) | 1.78 (0.68) | 4.33 (1.00) | 4.61 (0.84) | 4.28 (0.91) | 4.01 (0.84) | 4.27 (0.69) | 0.81 (0.18) |
| 8  | <b>Lung cancer type<sup>b</sup></b> |             |             |             |             |             |             |             |             |             |
| 9  | NSC-                                | 140 (53.6%) | 2.39 (0.78) | 1.88 (0.79) | 4.28 (0.99) | 4.56 (0.85) | 4.20 (0.94) | 3.91 (0.92) | 4.18 (0.70) | 0.79 (0.19) |
| 10 | Adenocarcinoma                      |             |             |             |             |             |             |             |             |             |
| 11 | NSC-Squamous                        | 47 (18.0%)  | 2.50 (0.81) | 1.84 (0.80) | 4.45 (0.85) | 4.68 (0.63) | 4.32 (0.86) | 4.00 (0.81) | 4.26 (0.57) | 0.81 (0.14) |
| 12 | NSC-Poorly                          | 24 (9.2%)   | 2.46 (0.61) | 1.77 (0.67) | 4.08 (1.25) | 4.38 (1.21) | 3.88 (1.39) | 3.75 (0.94) | 4.13 (0.99) | 0.72 (0.24) |
| 13 | differentiated                      |             |             |             |             |             |             |             |             |             |
| 14 | NSC-others                          | 7 (2.7%)    | 2.30 (0.60) | 1.64 (0.40) | 4.71 (0.49) | 5.00 (0.00) | 4.71 (0.49) | 4.71 (0.49) | 4.57 (0.53) | 0.92 (0.10) |
| 15 | Small cell                          | 43 (16.5%)  | 2.26 (0.76) | 1.76 (0.71) | 4.49 (0.96) | 4.67 (0.87) | 4.49 (0.88) | 4.26 (0.73) | 4.35 (0.78) | 0.85 (0.17) |
| 16 | <b>Treatment</b>                    |             |             |             |             |             |             |             |             |             |
| 17 | Received surgery                    |             |             |             |             |             |             |             |             |             |
| 18 | Yes                                 | 61 (23.4%)  | 2.49 (0.78) | 1.95 (0.85) | 4.20 (0.98) | 4.51 (0.83) | 4.20 (0.96) | 3.97 (0.86) | 4.30 (0.74) | 0.80 (0.18) |
| 19 | No                                  | 200 (76.6%) | 2.36 (0.75) | 1.80 (0.73) | 4.38 (0.98) | 4.62 (0.85) | 4.27 (0.97) | 4.00 (0.88) | 4.21 (0.72) | 0.80 (0.19) |
| 20 | Received                            |             |             |             |             |             |             |             |             |             |
| 21 | chemotherapy                        |             |             |             |             |             |             |             |             |             |
| 22 | Yes                                 | 252 (96.6%) | 2.40 (0.76) | 1.83 (0.76) | 4.33 (0.99) | 4.59 (0.86) | 4.25 (0.98) | 4.00 (0.87) | 4.22 (0.73) | 0.80 (0.19) |
| 23 | No                                  | 9 (3.4%)    | 2.16 (0.68) | 1.83 (0.72) | 4.44 (0.73) | 4.67 (0.50) | 4.33 (0.71) | 3.67 (1.00) | 4.33 (0.50) | 0.81 (0.16) |
| 24 | Received                            |             |             |             |             |             |             |             |             |             |
| 25 | radiotherapy                        |             |             |             |             |             |             |             |             |             |
| 26 | Yes                                 | 61 (23.4%)  | 2.36 (0.70) | 2.04 (0.87) | 4.05 (1.19) | 4.33 (1.21) | 4.02 (1.09) | 3.74 (1.05) | 4.13 (0.62) | 0.74 (0.23) |
| 27 | No                                  | 200 (76.6%) | 2.40 (0.78) | 1.77 (0.71) | 4.43 (0.89) | 4.68 (0.69) | 4.33 (0.92) | 4.07 (0.80) | 4.26 (0.75) | 0.82 (0.16) |
| 28 | Received targeted                   |             |             |             |             |             |             |             |             |             |
| 29 | therapy                             |             |             |             |             |             |             |             |             |             |
| 30 | Yes                                 | 38 (14.6%)  | 2.24 (0.79) | 1.83 (0.56) | 4.21 (1.14) | 4.47 (1.08) | 4.11 (1.09) | 3.79 (1.04) | 4.26 (0.64) | 0.77 (0.25) |
| 31 | No                                  | 223 (85.4%) | 2.42 (0.75) | 1.83 (0.79) | 4.36 (0.95) | 4.61 (0.80) | 4.28 (0.95) | 4.03 (0.84) | 4.22 (0.74) | 0.81 (0.17) |
| 32 |                                     |             |             |             |             |             |             |             |             |             |
| 33 |                                     |             |             |             |             |             |             |             |             |             |
| 34 |                                     |             |             |             |             |             |             |             |             |             |
| 35 |                                     |             |             |             |             |             |             |             |             |             |
| 36 |                                     |             |             |             |             |             |             |             |             |             |
| 37 |                                     |             |             |             |             |             |             |             |             |             |
| 38 |                                     |             |             |             |             |             |             |             |             |             |
| 39 |                                     |             |             |             |             |             |             |             |             |             |
| 40 |                                     |             |             |             |             |             |             |             |             |             |
| 41 |                                     |             |             |             |             |             |             |             |             |             |
| 42 |                                     |             |             |             |             |             |             |             |             |             |
| 43 |                                     |             |             |             |             |             |             |             |             |             |
| 44 |                                     |             |             |             |             |             |             |             |             |             |
| 45 |                                     |             |             |             |             |             |             |             |             |             |
| 46 |                                     |             |             |             |             |             |             |             |             |             |

1  
2  
3  
4  
5  
6  
7  
8  
9  
10  
11  
12  
13  
14  
15  
16  
17  
18  
19  
20  
21  
22  
23  
24  
25  
26  
27  
28  
29  
30  
31  
32  
33  
34  
35  
36  
37  
38  
39  
40  
41  
42  
43  
44  
45  
46

Scale range: Confrontation, resigned acceptance: 1 (never) – 4 (very often); Positive mood, negative mood: 1 (very slightly) – 5 (extremely);  
Mobility, self-care, usual activities, pain/discomfort, anxiety/depression: 1 (very severe) – 5 (no); EQ-5D utility index: -1 (worse than death) – 1  
(full health)

For peer review only

Figure 1 Flow Chart of the Sample Selection Procedure





**STROBE 2007 (v4) checklist of items to be included in reports of observational studies in epidemiology\***  
**Checklist for cohort, case-control, and cross-sectional studies (combined)**

| Section/Topic             | Item # | Recommendation                                                                                                                                                                                                                                                                                                                                                                                                                                                         | Reported on page # |
|---------------------------|--------|------------------------------------------------------------------------------------------------------------------------------------------------------------------------------------------------------------------------------------------------------------------------------------------------------------------------------------------------------------------------------------------------------------------------------------------------------------------------|--------------------|
| Title and abstract        | 1      | (a) Indicate the study's design with a commonly used term in the title or the abstract                                                                                                                                                                                                                                                                                                                                                                                 | 1,2                |
|                           |        | (b) Provide in the abstract an informative and balanced summary of what was done and what was found                                                                                                                                                                                                                                                                                                                                                                    | 2,3                |
| <b>Introduction</b>       |        |                                                                                                                                                                                                                                                                                                                                                                                                                                                                        |                    |
| Background/rationale      | 2      | Explain the scientific background and rationale for the investigation being reported                                                                                                                                                                                                                                                                                                                                                                                   | 4-7                |
| Objectives                | 3      | State specific objectives, including any pre-specified hypotheses                                                                                                                                                                                                                                                                                                                                                                                                      | 7                  |
| <b>Methods</b>            |        |                                                                                                                                                                                                                                                                                                                                                                                                                                                                        |                    |
| Study design              | 4      | Present key elements of study design early in the paper                                                                                                                                                                                                                                                                                                                                                                                                                | 7-8                |
| Setting                   | 5      | Describe the setting, locations, and relevant dates, including periods of recruitment, exposure, follow-up, and data collection                                                                                                                                                                                                                                                                                                                                        | 7-8                |
| Participants              | 6      | (a) <i>Cohort study</i> —Give the eligibility criteria, and the sources and methods of selection of participants. Describe methods of follow-up<br><i>Case-control study</i> —Give the eligibility criteria, and the sources and methods of case ascertainment and control selection. Give the rationale for the choice of cases and controls<br><i>Cross-sectional study</i> —Give the eligibility criteria, and the sources and methods of selection of participants | 8                  |
|                           |        | (b) <i>Cohort study</i> —For matched studies, give matching criteria and number of exposed and unexposed<br><i>Case-control study</i> —For matched studies, give matching criteria and the number of controls per case                                                                                                                                                                                                                                                 |                    |
| Variables                 | 7      | Clearly define all outcomes, exposures, predictors, potential confounders, and effect modifiers. Give diagnostic criteria, if applicable                                                                                                                                                                                                                                                                                                                               | 8-10               |
| Data sources/ measurement | 8*     | For each variable of interest, give sources of data and details of methods of assessment (measurement). Describe comparability of assessment methods if there is more than one group                                                                                                                                                                                                                                                                                   | 8-10               |
| Bias                      | 9      | Describe any efforts to address potential sources of bias                                                                                                                                                                                                                                                                                                                                                                                                              |                    |
| Study size                | 10     | Explain how the study size was arrived at                                                                                                                                                                                                                                                                                                                                                                                                                              | 11                 |
| Quantitative variables    | 11     | Explain how quantitative variables were handled in the analyses. If applicable, describe which groupings were chosen and why                                                                                                                                                                                                                                                                                                                                           | 10-11              |
| Statistical methods       | 12     | (a) Describe all statistical methods, including those used to control for confounding                                                                                                                                                                                                                                                                                                                                                                                  | 10-11              |
|                           |        | (b) Describe any methods used to examine subgroups and interactions                                                                                                                                                                                                                                                                                                                                                                                                    |                    |
|                           |        | (c) Explain how missing data were addressed                                                                                                                                                                                                                                                                                                                                                                                                                            | 8                  |
|                           |        | (d) <i>Cohort study</i> —If applicable, explain how loss to follow-up was addressed<br><i>Case-control study</i> —If applicable, explain how matching of cases and controls was addressed                                                                                                                                                                                                                                                                              | Not applicable     |

|                          |     |                                                                                                                                                                                                              |                        |
|--------------------------|-----|--------------------------------------------------------------------------------------------------------------------------------------------------------------------------------------------------------------|------------------------|
|                          |     | <i>Cross-sectional study</i> —If applicable, describe analytical methods taking account of sampling strategy                                                                                                 |                        |
|                          |     | (e) Describe any sensitivity analyses                                                                                                                                                                        |                        |
| <b>Results</b>           |     |                                                                                                                                                                                                              |                        |
| Participants             | 13* | (a) Report numbers of individuals at each stage of study—eg numbers potentially eligible, examined for eligibility, confirmed eligible, included in the study, completing follow-up, and analysed            | 9                      |
|                          |     | (b) Give reasons for non-participation at each stage                                                                                                                                                         | Supplementary figure 1 |
|                          |     | (c) Consider use of a flow diagram                                                                                                                                                                           | Supplementary figure 1 |
| Descriptive data         | 14* | (a) Give characteristics of study participants (eg demographic, clinical, social) and information on exposures and potential confounders                                                                     | 11-13                  |
|                          |     | (b) Indicate number of participants with missing data for each variable of interest                                                                                                                          | 13                     |
|                          |     | (c) <i>Cohort study</i> —Summarise follow-up time (eg, average and total amount)                                                                                                                             | Not applicable         |
| Outcome data             | 15* | <i>Cohort study</i> —Report numbers of outcome events or summary measures over time                                                                                                                          | Not applicable         |
|                          |     | <i>Case-control study</i> —Report numbers in each exposure category, or summary measures of exposure                                                                                                         | Not applicable         |
|                          |     | <i>Cross-sectional study</i> —Report numbers of outcome events or summary measures                                                                                                                           | 14,15                  |
| Main results             | 16  | (a) Give unadjusted estimates and, if applicable, confounder-adjusted estimates and their precision (eg, 95% confidence interval). Make clear which confounders were adjusted for and why they were included | 14-22                  |
|                          |     | (b) Report category boundaries when continuous variables were categorized                                                                                                                                    | 14-22                  |
|                          |     | (c) If relevant, consider translating estimates of relative risk into absolute risk for a meaningful time period                                                                                             | Not applicable         |
| Other analyses           | 17  | Report other analyses done—eg analyses of subgroups and interactions, and sensitivity analyses                                                                                                               |                        |
| <b>Discussion</b>        |     |                                                                                                                                                                                                              |                        |
| Key results              | 18  | Summarise key results with reference to study objectives                                                                                                                                                     | 23                     |
| Limitations              | 19  | Discuss limitations of the study, taking into account sources of potential bias or imprecision. Discuss both direction and magnitude of any potential bias                                                   | 25-26                  |
| Interpretation           | 20  | Give a cautious overall interpretation of results considering objectives, limitations, multiplicity of analyses, results from similar studies, and other relevant evidence                                   | 23-26                  |
| Generalisability         | 21  | Discuss the generalisability (external validity) of the study results                                                                                                                                        | 25-26                  |
| <b>Other information</b> |     |                                                                                                                                                                                                              |                        |
| Funding                  | 22  | Give the source of funding and the role of the funders for the present study and, if applicable, for the original study on which the present article is based                                                | 27                     |

\*Give information separately for cases and controls in case-control studies and, if applicable, for exposed and unexposed groups in cohort and cross-sectional studies.

1  
2  
3  
4  
5  
6  
7  
8  
9  
10  
11  
12  
13  
14  
15  
16  
17  
18  
19  
20  
21  
22  
23  
24  
25  
26  
27  
28  
29  
30  
31  
32  
33  
34  
35  
36  
37  
38  
39  
40  
41  
42  
43  
44  
45  
46

**Note:** An Explanation and Elaboration article discusses each checklist item and gives methodological background and published examples of transparent reporting. The STROBE checklist is best used in conjunction with this article (freely available on the Web sites of PLoS Medicine at <http://www.plosmedicine.org/>, Annals of Internal Medicine at <http://www.annals.org/>, and Epidemiology at <http://www.epidem.com/>). Information on the STROBE Initiative is available at [www.strobe-statement.org](http://www.strobe-statement.org).

For peer review only
